# Supplementary material for: Associative stigma among mental health professionals in Singapore: a cross-sectional study
Source: PubMed Central journal article supplement — BMJ Open. 2019 Jul 11;9(7):e028179. doi: 10.1136/bmjopen-2018-028179 (PMC6629392; doi:10.1136/bmjopen-2018-028179), 2019-07-11
Supplement: bmjopen-2018-028179.draft_revisions.pdf [file bmjopen-2018-028179.draft_revisions.pdf]

# BMJ Open

BMJ Open is committed to open peer review. As part of this commitment we make the peer review history of every article we publish publicly available.

When an article is published we post the peer reviewers' comments and the authors' responses online. We also post the versions of the paper that were used during peer review. These are the versions that the peer review comments apply to.

The versions of the paper that follow are the versions that were submitted during the peer review process. They are not the versions of record or the final published versions. They should not be cited or distributed as the published version of this manuscript.

BMJ Open is an open access journal and the full, final, typeset and author-corrected version of record of the manuscript is available on our site with no access controls, subscription charges or pay-per-view fees (<http://bmjopen.bmj.com>).

If you have any questions on BMJ Open's open peer review process please email [info.bmjopen@bmj.com](mailto:info.bmjopen@bmj.com)

# BMJ Open

## Associative stigma among mental health professionals: a cross-sectional study

|                               |                                                                                                                                                                                                                                                                                                                                                                                                                                                                                                                                                                                                                                                                                                                                            |
|-------------------------------|--------------------------------------------------------------------------------------------------------------------------------------------------------------------------------------------------------------------------------------------------------------------------------------------------------------------------------------------------------------------------------------------------------------------------------------------------------------------------------------------------------------------------------------------------------------------------------------------------------------------------------------------------------------------------------------------------------------------------------------------|
| Journal:                      | <i>BMJ Open</i>                                                                                                                                                                                                                                                                                                                                                                                                                                                                                                                                                                                                                                                                                                                            |
| Manuscript ID                 | bmjopen-2018-028179                                                                                                                                                                                                                                                                                                                                                                                                                                                                                                                                                                                                                                                                                                                        |
| Article Type:                 | Research                                                                                                                                                                                                                                                                                                                                                                                                                                                                                                                                                                                                                                                                                                                                   |
| Date Submitted by the Author: | 26-Nov-2018                                                                                                                                                                                                                                                                                                                                                                                                                                                                                                                                                                                                                                                                                                                                |
| Complete List of Authors:     | Picco, Louisa; Institute of Mental Health, Research Division<br>Chang, Sherilyn; Institute of Mental Health, Research Division<br>Abdin , Edimansyah ; Institute of Mental Health, Research Division<br>Chua, Boon Yiang; Institute of Mental Health, Research Division<br>Yuan, Qi; Institute of Mental Health, Research Division<br>Vaingankar, Janhavi; Institute of Mental Health, Singapore, Research<br>Ong, Samantha ; Institute of Mental Health, Nursing<br>Yow, Kah Lai; Institute of Mental Health, Allied Health<br>Chua, Hong Choon; Institute of Mental Health, Chief Executive Office<br>Chong, Siow Ann ; Institute of Mental Health, Research Division<br>Subramaniam, M; Institute of Mental Health, Singapore, Research |
| Keywords:                     | MENTAL HEALTH, PSYCHIATRY, PRIMARY CARE                                                                                                                                                                                                                                                                                                                                                                                                                                                                                                                                                                                                                                                                                                    |
|                               |                                                                                                                                                                                                                                                                                                                                                                                                                                                                                                                                                                                                                                                                                                                                            |

SCHOLARONE™  
Manuscripts

1  
2  
3 **Title: Associative stigma among mental health professionals: a cross-sectional study**  
4  
5

6 **Authors:**

7 Louisa Picco\*, [louisa.picco@gmail.com](mailto:louisa.picco@gmail.com)

8 Sherilyn Chang\*, [Sherilyn\\_Sh\\_CHANG@imh.com.sg](mailto:Sherilyn_Sh_CHANG@imh.com.sg)

9 Edimansyah Abdin\*, [edimansyah\\_abdin@imh.com.sg](mailto:edimansyah_abdin@imh.com.sg)

10 Boon Yiang Chua\*, [boon\\_yiang\\_chua@imh.com.sg](mailto:boon_yiang_chua@imh.com.sg)

11 Qi Yuan\*, [Qi\\_YUAN@imh.com.sg](mailto:Qi_YUAN@imh.com.sg)

12 Janhavi Ajit Vaingankar\*, [janhavi\\_vaingankar@imh.com.sg](mailto:janhavi_vaingankar@imh.com.sg)

13 Samantha Ong<sup>a</sup>, [samantha\\_ong@imh.com.sg](mailto:samantha_ong@imh.com.sg)

14 Kah Lai Yow<sup>b</sup>, [kah\\_lai\\_yow@imh.com.sg](mailto:kah_lai_yow@imh.com.sg)

15 Hong Choon Chua<sup>c</sup>, [Hong\\_Choon\\_Chua@imh.com.sg](mailto:Hong_Choon_Chua@imh.com.sg)

16 Siow Ann Chong\*, [siow\\_ann\\_chong@imh.com.sg](mailto:siow_ann_chong@imh.com.sg)

17 Mythily Subramaniam\*, [mythily@imh.com.sg](mailto:mythily@imh.com.sg)

18 \* Research Division, Institute of Mental Health, Singapore

19 <sup>a</sup> Nursing Administration, Institute of Mental Health, Singapore

20 <sup>b</sup> Clinical and Allied Health Professionals Services, Institute of Mental Health, Singapore

21 <sup>c</sup> Chief Executive Office, Institute of Mental Health, Singapore

22  
23  
24  
25  
26  
27  
28  
29  
30  
31  
32  
33  
34  
35 **Corresponding author:**

36 Louisa Picco

37 Manager, Research Division

38 Institute of Mental Health

39 Buangkok Green Medical Park

40 10 Buangkok View

41 Singapore 539747

42 Email: [louisa.picco@gmail.com](mailto:louisa.picco@gmail.com)

## ABSTRACT

**Objectives:** (i) Investigate and explore the extent of associative stigma using latent class analysis; (ii) Determine the socio-demographic correlates of associative stigma; and (iii) Examine the relationship between associative stigma and job satisfaction, among mental health professionals.

**Design:** Cross-sectional online survey

**Participants:** Doctors, nurses and allied health staff, working in Singapore

**Methods:** Staff (n=462) completed an online survey which comprised 11 associative stigma items and also captured socio-demographic and job satisfaction related information. Latent class analysis was used to classify associative stigma upon patterns of observed categorical variables. Multinomial logistic regression was used to examine associations between socio-demographic factors and the different classes, while multiple linear regression analyses was used to examine the relationship between associative stigma and job satisfaction.

**Results:** The latent class analysis revealed that items formed a 3-class model where the classes were classified as 'no/low associative stigma', 'moderate associative stigma' and 'high associative stigma'. 48.7%, 40.5% and 10.8% of the population comprised no/low, moderate and high associative stigma classes, respectively. Multinomial logistic regression showed that years of service and occupation were significantly associated with moderate associative stigma, while factors associated with high associative stigma were education, ethnicity and occupation. Multiple linear regression analyses revealed that high associative stigma was significantly associated with lower job satisfaction scores.

**Conclusion:** Associative stigma was not uncommon among mental health professionals and was associated with various socio-demographic factors and poorer job satisfaction. Associative stigma has received comparatively little attention from empirical researchers and continued efforts to address this under-studied yet important construct in conjunction with future efforts to dispel misconceptions related to mental illness are needed.

**Key words:** associative stigma, latent class analysis, mental health, doctors, nurses, allied health staff

## ARTICLE SUMMARY

### Strengths and limitations of the study

- This is the first study to explore associative stigma among mental health professionals in Asia.
- Latent class analysis was used to classify associative stigma upon patterns of observed categorical variables.
- Multinomial logistic regression and multiple linear regression analyses were used to examine associations between socio-demographic factors and associative stigma and the relationship between associative stigma and job satisfaction.
- The study has some limitations including the cross-sectional design, it may be subjected to social desirability bias and it lacks generalisability due to inclusion criteria.

### INTRODUCTION

Stigma relating to mental illness is a global issue and often results from misunderstandings, negative stereotypes and perceptions society has about people with mental illness. These people are frequently viewed or labeled as incompetent, irresponsible, unpredictable, and dangerous [1]. The consequences of stigma and discrimination result in people with mental illness avoiding care and treatment, preferring denial or choosing not to disclose their condition [2]. Furthermore this prejudice and discrimination has damaging effects to other aspects of their lives including employment and job opportunities, relationships, housing opportunities, life satisfaction as well as self-esteem and self-efficacy [3-6]. Stigma is multi-faceted and complex and impacts people with a mental illness, their families, caregivers, and even health professionals working in mental health care.

To date there has been extensive literature surrounding stigma towards those with a mental illness however stigma does not only affect those who are being stigmatized but can also emanate from close association to these people. Associative stigma otherwise referred to as affiliate stigma, courtesy stigma or secondary stigma describes the process by which a person experiences stigmatization as a result of an association with another stigmatized person [2,7]. This stigma by association may be experienced by parents, spouses, siblings, children, friends, caregivers or co-workers of the stigmatized. More recently, there has been a growing interest in associative stigma experienced by mental health professionals, whereby they or the psychiatric discipline is judged along the same stigmatizing stereotypes as their patients [8]. Negative and stigmatizing beliefs relating to mental health professionals not only discredit the valuable contributions these individuals make, but more importantly, these beliefs discredit the needs of

1  
2  
3 people who access mental healthcare. Furthermore, negative perceptions of mental health  
4 professionals may in fact further exacerbate the stigma of mental illness [7].  
5  
6  
7

8 There is a dearth of literature concerning associative stigma experienced by mental health care  
9 professionals. **Verhaeghe and Bracke [9]** investigated the link between associative stigma and  
10 burnout and job satisfaction among mental health professionals in Belgium, and found that  
11 associative stigma was related to more depersonalization, more emotional exhaustion, and less  
12 job satisfaction. In a second study, **Ben Natan et al., [10]** compared attitudes and stigma among  
13 psychiatric and non-psychiatric nurses in Israel and found that non-psychiatric nurses held more  
14 stigmatizing views towards mental illness, individuals with mental illness and the role of  
15 psychiatric nursing, although associative stigma did not differ between the two groups. A recent  
16 qualitative study among mental health clinicians from varying professional backgrounds including  
17 allied health staff, psychiatrists and law enforcement, found that these professionals commonly  
18 endorsed experiences of associative stigma from community members [11]. There have also  
19 been a few earlier studies which have explored associative stigma among nurses [7,12, 13], whilst  
20 to our knowledge, in addition to the qualitative study described above, there has only been one  
21 other study that included allied health staff working in mental health care [9], and none of which  
22 have been undertaken in Asian settings. Less is therefore known about the extent of associative  
23 stigma amongst health professionals working in Asia and how this may compare to Western  
24 cultures.  
25  
26  
27  
28  
29  
30  
31  
32  
33  
34  
35

36 In order to bridge this gap and address this need, we have investigated associative stigma  
37 experienced by staff working at the Institute of Mental Health (IMH). IMH is the only tertiary  
38 psychiatric hospital in Singapore and encompasses a 2000 bed in-patient facility as well as  
39 specialist outpatient clinics and employs over 1500 doctors, nurses and allied health staff  
40 including psychologists, pharmacists, occupational therapists, physiotherapists, case managers  
41 and medical social workers. The aims of this study were to: (i) investigate and explore the extent  
42 of associative stigma; (ii) determine the socio-demographic correlates of associative stigma; and  
43 (iii) examine the relationship between associative stigma and job satisfaction, among mental  
44 health professionals (doctors, nurses, psychologists, pharmacists, occupational therapists,  
45 physiotherapists, case managers, counselors and medical social workers) working at IMH.  
46  
47  
48  
49  
50  
51  
52

53 At the time this study was conducted, there was no developed or validated tool to measure  
54 associative stigma and accordingly comparisons across studies are difficult. In order to explore  
55  
56  
57

1  
2  
3 associative stigma in the current study, latent class analysis was used. Previous research has  
4 mainly been conducted to develop and validate stigma scales that measure stigma towards those  
5 with a mental illness. However, much of this research has validated these scales using a variable-  
6 centered approach, such as exploratory and confirmatory factor analysis. Such methods measure  
7 stigma as a total community or population score and this mean score may not give the full picture  
8 of the complex phenomena of stigma, which is often multi-faceted within individuals and  
9 populations [14].  
10  
11  
12  
13  
14

15  
16 An alternative approach that can enhance understanding of the varying characteristics and levels  
17 of stigma within a population is latent class analysis. Latent class analysis is a respondent-  
18 centered approach that aims to group individuals into class groups based on their responses to a  
19 set of observed variables. It has been widely used in behavioural and social science research to  
20 uncover unobserved heterogeneity in a population and to find substantively meaningful groups of  
21 people that are similar in their responses to measured variables or growth trajectories [15]. Once  
22 individuals are assigned to their most likely class, based on their responses to observed variables,  
23 it is then possible to examine other features such as socio-demographic correlates of each class,  
24 to determine predictors of these classes [16].  
25  
26  
27  
28  
29  
30

## 31 **METHODS**

### 32 **Participants and procedure**

33  
34 Doctors, nurses and allied health staff (psychologists, pharmacists, occupational therapists,  
35 physiotherapists, case managers and medical social workers) working at IMH were invited to  
36 participate in the survey, which was administered via Questionpro, an online survey application.  
37 Staff were informed of the study and the inclusion criteria via email and were sent a link to the  
38 online survey. Inclusion criteria required respondents to be: (i) Singapore citizens, permanent  
39 residents or foreigners with an employment or work permit; (ii) doctors, nurses, or allied health  
40 staff currently working at IMH and; (iii) aged 21 years and above. Staff who were willing to  
41 participate in the survey were required to read and accept an online consent form thus indicating  
42 their willingness and consent to participate in the study.  
43  
44  
45  
46  
47  
48  
49

50  
51 It was estimated that a sample size of approximately 200 nurses and 200 allied health staff would  
52 be needed to explore differences in associative stigma amongst the two groups, where sample  
53 size calculations were performed using PS (power and sample size calculation) software for  
54 comparing means. Accordingly, once this limit was reached, subsequent staff who wished to  
55  
56  
57

1  
2  
3 participate in the survey were sent a message informing them recruitment had ceased. Data were  
4 collected between February and April 2016, with a total of 470 participants completing the study;  
5 eight cases were removed due to unreliable data or staff not meeting the inclusion criteria. Ethical  
6 approval was obtained from the Domain Specific Review Board of the National Healthcare Group,  
7 Singapore.  
8  
9  
10

### 11 12 **Measures**

13  
14 At the time this study was conducted, there was no developed and validated instrument which  
15 measured associative stigma. Two recent studies [9,10] derived items to measure associative  
16 stigma, based on their own literature reviews. Modified versions of some of these items were used  
17 and additional items were also added based on our own literature review. Five items were  
18 answered using a 5-point scale from never (1) to all the time (5) [9]:  
19  
20  
21

- 22 1. People react negatively when they know I work in a mental health care setting<sup>1</sup>
- 23 2. People make jokes about me for working in a mental health care setting<sup>1</sup>
- 24 3. I feel ashamed to be working in a mental health care setting<sup>1</sup>
- 25 4. I am reluctant to tell people I work in a mental health care setting<sup>1</sup>
- 26 5. I have been treated unfairly by others when they learn I work in a mental health care setting.  
27  
28  
29

30  
31 An additional six items were answered using the following response categories and similar to  
32 those used by Ben Natan et al., [10]: Strongly agree; Slightly agree; Neither agree nor disagree;  
33 Slightly disagree; Strongly disagree. Items included:  
34  
35

- 36 1. Most people think less of a person who works in that works a mental health care setting
- 37 2. Once they know a person works in a mental health care setting, most people will take their  
38 opinions less seriously
- 39 3. Mental health care contributes to the health of people, families, communities and society in  
40 unique and meaningful ways<sup>2</sup>
- 41 4. The mental health profession lacks a scientific basis<sup>2</sup>
- 42 5. Working in a mental health care setting does not require special skills<sup>2</sup>
- 43 6. Mental health work is dangerous<sup>2</sup>.  
44  
45  
46  
47  
48  
49  
50  
51  
52  
53

---

54 <sup>1</sup> Items were based on Verhaeghe et al., 2012

55 <sup>2</sup> Items were based on Ben Natan et al., 2015



1  
2  
3 Socio-demographic information was captured including age, gender, ethnicity, marital and  
4 residency status and education. In addition, staff were asked to indicate how long they had worked  
5 at IMH, their occupation, and to rate their job satisfaction on a scale from 1-10, where 1 indicated  
6 they were very dissatisfied and 10 indicated very satisfied.  
7  
8  
9

### 10 11 **Statistical analysis**

12 All statistical analyses were done using SAS 9.2 (SAS Institute, Cary, North Carolina, USA). Mean  
13 and standard deviations were calculated for continuous variables, and frequencies and  
14 percentages for categorical variables.  
15  
16  
17

#### 18 19 *Latent class analysis*

20 Latent class analysis was used to classify associative stigma upon patterns of observed  
21 categorical variables. Latent class analysis is a “respondent-centered” approach that seeks to  
22 group individuals into “classes” based on their responses to a set of items [16], and in this case,  
23 their responses to 11 associative stigma items. Latent class analysis is a mixture model that posits  
24 that there is an underlying unobserved categorical variable (i.e associative stigma) that divides a  
25 population into mutually exclusive and exhaustive latent classes. It is used to identify  
26 homogeneous subgroups, which share a common pattern of responses within a heterogeneous  
27 population. It relates a set of observed categorical variables to a set of latent variables. A latent  
28 class model with the optimal number of classes was determined using model fit statistics,  
29 including the likelihood ratio  $G^2$ , Akaike information criterion (AIC, smallest value preferred) and  
30 Bayesian information criterion (BIC, smallest value preferred), entropy (highest value preferred)  
31 values and interpretability of the derived classes [17].  
32  
33  
34  
35  
36  
37  
38  
39  
40

#### 41 *Multinomial logistic regression*

42 Multinomial logistic regression was used to examine associations between socio-demographic  
43 factors including age, gender, ethnicity, marital and residency status, education, years of  
44 employment and occupation and the different classes. We also used multiple linear regression  
45 analyses to examine the relationship between associative stigma and job satisfaction with and  
46 without adjustment for socio-demographic correlates. Statistical significance were reported at  $p$   
47  $<0.05$ .  
48  
49  
50  
51  
52

## 53 **RESULTS**

54  
55  
56  
57

1  
2  
3 The distribution of socio-demographic characteristics is presented in Table 1. The sample (n=462)  
4 comprised 58 doctors, 201 nurses and 203 allied health staff. The majority were female (63%),  
5 Chinese (60.2%) and had been working at IMH between one and five years (42.2%).  
6  
7

8  
9 Eight unconditional models ranging from two to nine classes were compared to one another using  
10 fit statistics to determine the appropriate class structure (Table 2). The AIC value was lowest for  
11 the 4-class model (AIC=575.42) and the BIC value was lowest for the 3-class model  
12 (BIC=762.48). The BIC value typically is considered a better measure of model fit because it  
13 penalizes for model complexity more than the AIC [17]. A careful examination of both the 3 and  
14 4-class model solutions led us to select the 3-class model because it was more easily identified,  
15 had greater parsimony, and its parameter estimates presented a solution with a more  
16 interpretable and distinct set of classes than the 4-class model (Figure 1).  
17  
18  
19  
20  
21  
22

23  
24 The parameter estimates depicted in Figure 1 and Table 3 provide the necessary information for  
25 interpreting and labeling each class, with regards to item-response probability (IRP). IRP values  
26 range from 0 to 1, where numbers closer to 0 represent a low probability of endorsing a specific  
27 associative stigma item, whereas values closer to 1 represent a high probability of endorsing the  
28 item. Each class then consists of different probabilities of endorsement for each of the 11  
29 associative stigma items. For example, the first latent class is characterized by a low IRP of  
30 endorsing the following items: “I feel ashamed to be working in a mental health care setting”(Item  
31 3), “I am reluctant to tell people I work in a mental health care setting” (Item 4), “I have been  
32 treated unfairly by others when they learn I work in a mental health care setting” (Item 5), “Most  
33 people think less of a person who works in a mental health care setting” (Item 6), “Once they  
34 know a person works in a mental health care setting, most people will take their opinions less  
35 seriously” (Item 7), “Mental health care contributes to the health of people, families, communities  
36 and society in unique and meaningful ways” (Item 8), “The mental health profession lacks a  
37 scientific basis” (Item 9) and “Working in a mental health care setting does not require special  
38 skills” (Item 10). The IRP ranged from 0.001 to 0.16, thus we labeled this subgroup “no/low  
39 associative stigma”. Class 2 comprised staff who were more likely to report higher response  
40 probabilities for items 1 (“People react negatively when they know they work in a mental health  
41 care setting”), 2 (“People make jokes about me for working in a mental health care setting”), 7  
42 and 11 (“Mental health work is dangerous”) than the “no/low stigma” and accordingly, we labeled  
43 this class as “moderate associative stigma”. Finally, the high probability of endorsing “sometimes”,  
44 “often” or “all the time” to items 1 and 2, and “strongly agree” or “slightly agree” to items 6, 7, 8, 9  
45  
46  
47  
48  
49  
50  
51  
52  
53  
54  
55  
56  
57

1  
2  
3 and item 11 (IRP ranges from 0.66 to 0.91) were associated with class 3, which was labeled  
4 as “high associative stigma”. Within these three class groups, 48.7%, 40.5% and 10.8% of the  
5 population comprised no/low, moderate and high associative stigma classes, respectively.  
6  
7

8  
9 The results of the multinomial logistic regression for the moderate and high associative stigma  
10 groups, with low stigma as the reference group are presented in Table 4. We found that staff  
11 working at IMH for less than one year ( $p=0.040$ ), and between six and ten years ( $p=0.029$ ) were  
12 less likely to have moderate associative stigma (versus staff working at IMH for more than 10  
13 years). Occupation was also a significant predictor; doctors ( $p=0.007$ ) and nurses ( $p=0.006$ ) were  
14 significantly more likely to experience moderate associative stigma compared to allied health staff.  
15 Factors associated with high associative stigma were lower education ( $p=0.042$ ), Indian ethnicity  
16 ( $p=0.043$ ) and being a nurse ( $p=0.001$ ).  
17  
18  
19  
20  
21  
22  
23

24 Table 5 shows the results from multiple linear regression analyses. After adjusting for socio-  
25 demographic variables, high associative stigma remained significantly associated with lower job  
26 satisfaction scores ( $p<0.0001$ ).  
27  
28  
29

## 30 DISCUSSION

31 There is paucity in the current literature which investigates associative stigma experienced by  
32 mental health professionals. This is the first study to examine associative stigma among mental  
33 health professionals using latent class analysis and endeavors to expand and build our knowledge  
34 and understanding of the patterns of associative stigma amongst each of the classes. The findings  
35 reveal that three distinct classes exist; no/low, moderate and high associative stigma which were  
36 associated with unique socio-demographic correlates. Moderate associative stigma was  
37 significantly associated with years of service and occupation, while high associative stigma was  
38 associated with Indian ethnicity, lower education and occupation.  
39  
40  
41  
42  
43  
44  
45

46 Findings revealed that 48.7%, 40.5% and 10.8% of staff working at a psychiatric hospital  
47 experienced no/low, moderate and high associative stigma, respectively. Whilst almost half of the  
48 staff experienced no or low associative stigma (48.7%), the remaining experienced moderate or  
49 high associative stigma, which is of concern. Moderate associative stigma comprised staff who  
50 were more likely to report higher response probabilities for the following items “People react  
51 negatively when they know they work in a mental health care setting”, “People make jokes about  
52 me for working in a mental health care setting”, “Once they know a person works in a mental  
53  
54  
55  
56  
57

1  
2  
3 health care setting, most people will take their opinions less seriously” and “Mental health work is  
4 dangerous”. These items relate largely to how other people perceive them and how they react  
5 towards them as a result of their profession and therefore efforts to better educate the general  
6 population as well as interventions targeting medical and nursing students are needed to dispel  
7 such misconceptions and stigma surrounding psychiatry and mental health care [18]. High  
8 associative stigma comprised staff that were also more likely to endorse items about other  
9 people’s reactions however it also encompassed items about the mental health profession  
10 including “The mental health profession lacks a scientific basis” and “Working in a mental health  
11 care setting does not require special skills”. Given the higher positive endorsement of the latter  
12 items, this indicates that even among mental health professionals, there is a level of stigma,  
13 uncertainty and even negative perceptions relating to mental health care and psychiatry and  
14 similar findings have also been previously reported [8,10]. It is therefore possible that a  
15 consequence of experiencing ongoing associative stigma, results in these staff holding more  
16 discriminatory views, whereby they internalize this stigma or may have higher perceived stigma.  
17 Efforts within mental health care are needed to build self-esteem and self-confidence, whilst at  
18 the same time, taking the opportunity to highlight success stories in mental health to the public  
19 more frequently [19].  
20  
21  
22  
23  
24  
25  
26  
27  
28  
29  
30

31 Various socio-demographic differences were associated with moderate and high associative  
32 stigma. For example, Indians (compared to Chinese) were nearly three times more likely to  
33 experience high associative stigma. Whilst it is difficult to postulate why this may be, some  
34 possible explanations are provided. Firstly, high associative stigma was associated with higher  
35 probability of endorsing positive responses to items relating to (i) how staff perceive the mental  
36 health profession and (ii) how people react towards them. Regarding the latter, we do not know  
37 about the specific people stigmatizing these staff and therefore gaining a greater understanding  
38 of the types of people that judge and stigmatize mental health professionals would allow future  
39 anti-stigma efforts to be targeted towards these population sub-groups. For the former (how staff  
40 perceive the mental health profession), this relates to the individual’s own personal views,  
41 whereby they perceive the discipline lacks a scientific basis, the profession doesn’t require special  
42 skills or that mental health care doesn’t contribute to the health of people, families and  
43 communities in a meaningful way. This could be an embedded cultural belief where in India  
44 psychiatry is still not considered an important medical specialty due to various societal  
45 apprehensions and ignorance [20]. Another possible explanation could be inferred from a recent  
46 population wide study in Singapore which found personal stigma towards people with mental  
47  
48  
49  
50  
51  
52  
53  
54  
55  
56  
57

1  
2  
3 illness formed two distinct dimensions: 'weak-not-sick' and 'dangerous/unpredictable' [21].  
4 Findings revealed that Indian ethnicity was significantly associated with higher scores on both  
5 factors, highlighting that Indians hold more stigmatizing attitudes and therefore it is possible that  
6 not only do they stigmatize more but hence perceive greater stigma. Mental illness stigma needs  
7 to be studied within its sociocultural context in order to understand its origins, meanings and  
8 consequences [22] and in doing so, this may provide great insight into the ethnic differences  
9 observed in relation to associative stigma.  
10  
11  
12  
13

14  
15  
16 Given the study sample comprised doctors, nurses and allied health professionals, the  
17 overwhelming majority were highly educated, with over 85% having a tertiary qualification or  
18 higher. Those with the least education, which still equates to approximately 10-11 years of  
19 education, were six times more likely to experience high associative stigma. Research locally and  
20 internationally has shown that those who are less educated tend to hold more stigmatizing views  
21 towards the mentally ill [21,23,24]. Whilst these studies are related to stigma towards people with  
22 mental illness and not stigma by association, the two are inter-related and therefore could explain  
23 this finding. Another possible explanation could be that those working in mental healthcare are  
24 perceived to not 'require special skills' and therefore those with lower education are predominantly  
25 working in this profession. Alternatively, given that high associative stigma was related to a higher  
26 likelihood of positively endorsing items such as "The mental health profession lacks a scientific  
27 basis" and "Working in a mental health care setting does not require special skills" this may  
28 suggest that staff with less education perceive that being highly educated is not essential to this  
29 profession.  
30  
31  
32  
33  
34  
35  
36  
37  
38

39  
40 The number of years of service in a mental health hospital was associated with moderate  
41 associative stigma. Staff working at the psychiatric hospital for less than one year and those with  
42 6-10 years of service, were less likely to experience moderate associative stigma, compared to  
43 those with over 10 years of service, whilst no significant differences were observed for those with  
44 1-5 years of service. For newer staff (less than one year), their association via a professional  
45 capacity with people who have a mental illness would be minimal compared to those with over 10  
46 years of experience. Therefore they would have only been exposed to possible associative stigma  
47 for this short period and hence less likely to experience any form of stigma, discrimination or  
48 prejudice. It is difficult however to postulate why staff with 6-10 years of service would experience  
49 less moderate associative stigma, versus those with over 10 years of service. Halter [7] in her  
50 study among nurses found that age was positively correlated with viewing psychiatric nurses as  
51  
52  
53  
54  
55  
56  
57

1  
2  
3 skilled, logical, dynamic and or respected. The author speculated that years of experience  
4 increased the likelihood of contact with people with mental illness, thus mediating the influence of  
5 stigmatizing attitudes [25]. We predicted, that as a result of working in mental healthcare for an  
6 extended period, staff would no longer be confronted with associative stigma and people would  
7 be less likely to 'react negatively' or 'make jokes' about where they work, whilst at the same time  
8 they would be 'acclimatized' to working in this setting. It could also be a result of some form of  
9 'stigma resistance', whereby these staff can resist or ignore the stigma associated with their  
10 profession, however this does not explain why staff with 6-10 years of service are less likely to  
11 experience associative stigma compared to those with over 10 years of service. Further research  
12 exploring the impact of the number of years or experience in mental health care and associative  
13 stigma are needed.  
14  
15  
16  
17  
18  
19  
20  
21

22 The strongest predictor of moderate and high associative stigma was occupation. Nurses were  
23 significantly more likely to experience both moderate and high associative stigma, while doctors  
24 were significantly more likely to experience moderate associative stigma, when compared to allied  
25 health staff. Numerous studies have recently investigated stigma towards mental health nursing  
26 [12,26], psychiatrists [27,28] and the discipline of psychiatry and mental health in general [19,29]  
27 which is often perpetuated by nurses, doctors, medical and nursing students and health  
28 professionals working in other sectors, as well as the general public [25]. Studies among medical  
29 students have shown that the overall status of psychiatry is low [18], where perceived low prestige  
30 and low respect among other medical disciplines are among the main reasons for not choosing  
31 psychiatry [30-34]. Similarly, a recent study among nursing students in Singapore found that only  
32 5.2% of students would 'definitely decide to do' psychiatric nursing [35]. A study among doctors  
33 which assessed reasons why they left the specialty they had initially chosen found that among  
34 psychiatrists, the most common reasons reported included the specialty's poor public image and  
35 the perceived lack of respect among other doctors [36]. It is therefore possible that for some  
36 doctors, psychiatry was not their first preference, whilst for others the sense of being 'looked down  
37 upon' by other health professionals resulted in increased associative stigma.  
38  
39  
40  
41  
42  
43  
44  
45  
46  
47  
48

49 Several studies among nurses and nursing students have found that psychiatry is ranked as one  
50 of the least preferred, attractive and respected disciplines in nursing [7,37]. Halter [7] explored  
51 the characteristics attributed to nurses in multiple disciplines, where psychiatric nurses were often  
52 described as unskilled, illogical, idle and disrespected. Whilst it could not be concluded whether  
53 these attitudes and perceptions were a consequence of associative stigma, such perceptions  
54  
55  
56  
57



1  
2  
3 about nurses working at the only tertiary psychiatric hospital in Singapore could explain why  
4 nurses were significantly more likely to experience associative stigma. An alternative explanation  
5 could be related to how nurses are perceived. Previous research in Singapore has shown that  
6 the local population often possesses low perceptions of nurses [38], which may further  
7 exacerbate the stigma they experience.  
8  
9  
10

11  
12 It is also possible that this stigma experienced by psychiatrists and nurses operates in two  
13 directions; the first being the stereotypic attitudes or perceptions projected out by them, whilst the  
14 second is the associated attributes projected on them, which they may internalize [13].  
15 Irrespective of the type of stigma, it is important that mental health professionals are aware of this  
16 and how this may impact their role and work-related tasks. In order to address moderate and high  
17 associative stigma associated with nurses and psychiatrists, these mental health professionals  
18 need to explore and challenge such cases of stigma experienced by them. Associative stigma not  
19 only devalues the individual but also the profession as a whole and therefore mental health  
20 professionals play an important role in dispelling mental illness stigma [13].  
21  
22  
23  
24  
25  
26  
27

28 Associative stigma was found to be associated with job satisfaction. After adjusting for socio-  
29 demographic correlates, we found that high associative stigma was associated with poorer job  
30 satisfaction. **Verhaeghe and Bracke [9]** found associative stigma was associated with  
31 depersonalization and emotional exhaustion among mental health professionals in Belgium, with  
32 the latter leading to decreased job satisfaction. The consequences of stigma in relation to job  
33 satisfaction have been well documented. Similarly, associative stigma among mental health  
34 professionals, can contribute to job stress and poorer outcomes not only in terms of staff well-  
35 being but the quality of care provided to patients and therefore the implications can be detrimental  
36 to both staff and their patients. Due to the cross-sectional nature of this study, the relation between  
37 job satisfaction and associative stigma could be bi-directional and therefore exploring this  
38 association over time would be beneficial.  
39  
40  
41  
42  
43  
44  
45  
46

47 The findings of this study should be viewed in light of the following limitations. Firstly, at the time  
48 the study was conducted, there was no developed and validated associative stigma measure,  
49 and therefore items used to measure associative stigma were based on previous research. Whilst  
50 such items have previously been used to measure associative stigma among various health care  
51 professionals, the settings have varied and therefore a detailed pilot or expert review in the local  
52 setting, would have been beneficial. Furthermore, given research has consistently highlighted the  
53  
54  
55  
56  
57

1  
2  
3 stigma associated with the mental healthcare profession, there is a need for a validated  
4 instrument which measures this important construct. This was a cross-sectional study among staff  
5 working at IMH and therefore these findings are not generalizable to all mental health  
6 professionals in Singapore, nor could causal relationships be established. However, given that  
7 this hospital is the primary provider of tertiary psychiatric care in Singapore, and all staff included  
8 in the study are involved with the care of patients with mental illness, it provides valuable insight  
9 into the stigma associated with the mental health profession. The study was limited to doctors,  
10 nurses and allied health staff and therefore associative stigma of other staff including health care  
11 attendants, patient services associates and administrative staff was not gathered and may differ.  
12 Data were not collected on response rates, but rather once the desired quota of nurses and allied  
13 health staff was reached (i.e 200 of each group) recruitment ceased, therefore it is difficult to  
14 ascertain the degree of selection bias. Finally, data collected were based on self-report and  
15 therefore respondents may have provided socially desirable responses or may not have felt  
16 comfortable disclosing possible stigma they may have experienced.  
17  
18  
19  
20  
21  
22  
23  
24  
25  
26

27 These limitations notwithstanding, this is one of just a few studies to explore associative stigma  
28 among mental health professionals, and to our knowledge the only study to explore this within an  
29 Asian setting, and has thus added to the existing sparse literature. Using latent class analysis,  
30 the current study has provided a greater understanding of the extent of associative stigma among  
31 psychiatrists, nurses and allied health staff working at a psychiatric hospital. A 3-class model of  
32 associative stigma was found to have the best fit, where classes were labeled as no/low, moderate  
33 and high associative stigma. Based on these classes, it would be beneficial to further explore this  
34 construct via longitudinal studies or repeatedly measuring associative stigma over time to  
35 compare outcomes across the different classes in order to determine effective interventions to  
36 reduce associative stigma among mental health professionals. At the same time, there is also a  
37 scarcity of literature relating to the development and evaluation of interventions to combat stigma  
38 experienced by health professionals [18]. Research has however shown that increment or  
39 improvement in knowledge as well as actual contact with people who have a mental illness can  
40 help to reduce stigma, whilst improving the image of psychiatry and psychiatrists [19].  
41  
42  
43  
44  
45  
46  
47  
48  
49

50 There is a need to further explore the outcomes of associative stigma, not just from the  
51 perspective of those experiencing this stigma (in this case mental health professionals) but the  
52 impact this stigma may have on their patients and potentially the wider community. Given that  
53 high associative stigma was associated with poorer job satisfaction, which has been shown to  
54  
55  
56  
57



1  
2  
3 have poorer outcomes for patients [9], the implications of this finding are not only important to the  
4 well-being of staff but also patients. In order to address and reduce associative stigma among  
5 mental health professionals, we need to know more about those who are stigmatizing mental  
6 health professionals, so targeted interventions towards these people or population sub-groups  
7 can be implemented to help reduce associative stigma and stigma in general. As stigma towards  
8 people with mental illness, psychiatrists, and the mental health profession is highly interrelated,  
9 the ongoing process and difficult task of combating mental illness stigma continues. Associative  
10 stigma has received comparatively little attention from empirical researchers and continued efforts  
11 to address this under-studied yet important construct in conjunction with future efforts to dispel  
12 many of these misconceptions are needed.  
13  
14  
15  
16  
17  
18  
19

20 **Word Count:** 4901  
21

## 22 **DECLARATIONS**

23  
24  
25 **Ethics approval:** Ethical approval was obtained from the Domain Specific Review Board of the  
26 National Healthcare Group, Singapore prior to the launch of the survey.  
27

28 **Patient consent:** Obtained  
29

30 **Acknowledgement of funding:** This research was supported by the Singapore Ministry of  
31 Health's National Medical Research Council under the Centre Grant Programme (Grant No.:  
32 NMRC/CG/004/2013).  
33

34 **Competing interest:** The authors declare they have no competing interests  
35

36 **Author contributions:** LP developed the study design, collected and verified the data and wrote  
37 the manuscript. SC assisted with the data collection and verification and provided intellectual  
38 inputs to the manuscript. EA and QY analyzed and interpreted the data and provided intellectual  
39 inputs to the manuscript. BYC assisted with the set-up and monitored the online survey and  
40 provided intellectual inputs to the manuscript. JAV provided intellectual inputs into the study  
41 design and interpretation of the findings. SO and KLY provided intellectual inputs into the study  
42 design and provided inputs to the manuscript. HCC provided clinical inputs into the findings and  
43 edited the manuscript. SAC and MS assisted in study design, interpreted the data, and provided  
44 intellectual inputs on the manuscript. All authors read and approved the final manuscript.  
45  
46  
47  
48  
49

50 **Availability of data and materials:** Data is not available for online access, however readers who  
51 wish to gain access to the data can write to the senior author Dr Mythily Subramaniam at  
52 [mythily@imh.com.sg](mailto:mythily@imh.com.sg) with their requests. Access can be granted subject to the Institutional  
53  
54  
55  
56  
57

1  
2  
3 Review Board (IRB) and the research collaborative agreement guidelines. This is a requirement  
4 mandated for this research study by our IRB and funders.  
5

6 **Acknowledgement:** The authors would like to thank Dr Merav Ben Natan for sharing their  
7 associative stigma questionnaire.  
8  
9  
10  
11  
12  
13  
14  
15  
16  
17  
18  
19  
20  
21  
22  
23  
24  
25  
26  
27  
28  
29  
30  
31  
32  
33  
34  
35  
36  
37  
38  
39  
40  
41  
42  
43  
44  
45  
46  
47  
48  
49  
50  
51  
52  
53  
54  
55  
56  
57  
58  
59  
60

For peer review only

## REFERENCES

1. Corrigan PW, Kosyluk KA. Mental illness stigma: types, constructs, and vehicles for change. In: Corrigan PW, editor. *The stigma of disease and disability*. Washington, DC: American Psychological Association; 2014.
2. Goffman, E. *Stigma: Notes on the management of spoiled identity*. New York: Simon and Schuster. 1963
3. Glozier, N. Workplace Effects of the Stigmatization of Depression. *J. Occup. Env. Med.* 1998;40:793-800.
4. Corrigan PW and Watson AC. Understanding the impact of stigma on people with mental illness. *World Psychiatry.* 2002;1: 16–20.
5. Link, B. G., E. Struening, S. Neese-Todd, S. Asmussen, and J. C. Phelan. The Consequences of Stigma for the Self-Esteem of People with Mental Illnesses. *Psych Serv* 2001; 52:1621-26.
6. Markowitz FE. The Effects of Stigma on the Psychological Well-Being and Life Satisfaction of Persons with Mental Illness. *J. Health Soc. Behav* 1998;39:335-47.
7. Halter, M. J. Perceived characteristics of psychiatric nurses: Stigma by association. *Arch Psychiatr Nurs*, 2008; 22: 20-26.
8. Ross, CA., & Goldner, EM. Stigma, negative attitudes and discrimination towards mental illness within the nursing profession: A review of the literature. *Journal of Psychiatric and Mental Health Nursing*, 2009;16: 558-567.
9. Verhaeghe M and Bracke P. Associative Stigma among Mental Health Professionals: Implications for Professional and Service User Well-Being. *J. Health Soc. Behav* 2012; 53(1):17-32
10. Ben Natan M, Drori T and Hochman O. Associative Stigma related to Psychiatric Nursing within the Nursing Profession. *Arch Psych Nurs* 2015;29(6):388-392.
11. Vayshenker BA, DeLuca J, Bustle T, Yanos P. "As soon as people hear that word...": Associative stigma among clinicians working with people with serious mental illness, *Journal of Public Mental Health*, 2018;17(1):pp.20-28
12. Gouthro, T. J. Recognizing and addressing the stigma associated with mental health nursing: A critical perspective. *Issues Ment. Health Nurs*, 2009;30(11),669-676
13. Delaney KR. Psychiatric Mental Health Nurses: Stigma Issues We Fail to See. *Arch Psych Nurs*, 2012; 26: 333–335
14. Pharris A, Hoa NP, Tishelman C, Marrone G, Kim Chuc NT, Brugha R, Thorson A. Community patterns of stigma towards persons living with HIV: a population-based latent class analysis from rural Vietnam. *BMC Public Health.* 2011 Sep 18;11:705.
15. Nylund KL, Asparouhov T, Muthen BO. Deciding on the number of classes in latent class analysis and growth mixture modeling: A Monte Carlo simulation study. *Structural equation modeling* 2007;14: 535–69
16. Hadzi-Pavlovic D (2009) Finding patterns and groupings: I. Introduction to latent class analysis. *Acta Neuropsychiatrica* 21: 312–13.
17. Collins LM, Lanza ST: *Latent class and latent transition analysis with applications in the social, behavioral, and health sciences*. Hoboken, New Jersey: John Wiley & Sons, Inc; 2010.
18. Sartorius N, Gaebel W, Cleveland H, Stuart H, Akiyama T et al. WPA guidance on how to combat stigmatization of psychiatry and psychiatrists. *World Psychiatry* 2010;9:131-144
19. Moller-Leimkuhler AM, Möller HJ, Maier W, Gaebel W, Falkai P. EPA guidance on improving the image of psychiatry. *Eur Arch Psychiatry Clin Neurosci* 2016; 266:139–154

20. Sood M and Chadda RK. Women in psychiatry: A view from the Indian subcontinent. *Indian J Psychiatry*. 2009; 51(3): 199–201
21. Subramaniam M, Abidin E, Picco L, Pang S, Shafie S, Vaingankar JA, Kwok KW, Verma K and Chong SA. Stigma towards people with mental disorders and its components – a perspective from multi-ethnic Singapore. *Epidemiology and Psychiatric Sciences*, 2106; 28:1-12.
22. Thara R & Srinivasan TN. How stigmatizing is schizophrenia in India? *Int J Soc Psychiatry* 2000; 46: 135-41
23. Griffiths KM, Christensen H, Jorm AF. Predictors of depression stigma. *BMC Psychiatry* 2008; 8:25.
24. Corrigan PW, Watson AC. The stigma of psychiatric disorders and the gender, ethnicity, and education of the perceiver. *Community Ment Health J* 2007;43, 439–458.
25. Alexander LA and Link BG. The impact of contact on stigmatizing attitudes toward people with mental illness. *Journal of Mental Health*, 2003;12, 271–289.
26. Halter, M. J. Stigma in psychiatric nursing. *Perspectives in Psychiatric Care*, 2002;38, 23-29.
27. Cattoor K, Hutsebaut J, Schrijvers D, De Hert M, Peuskens J, Sabbe B. Preliminary study of associative stigma among trainee psychiatrists in Flanders, Belgium. *World J Psychiatry* 2014;4:62–68
28. Gaebel W, Zask H, Zielasek J, Cleveland H, Samjeske K et al. Stigmatization of psychiatrists and general practitioners: results of an international survey. *Eur Arch Psychiatry Clin Neurosci* 2015; 265:189–197
29. Gaebel W, Zäske H, Cleveland HR, Zielasek J, Stuart H, Arboleda-Florez J et al., Measuring the stigma of psychiatry and psychiatrists: Development of a questionnaire. *European Archives of Psychiatry and Clinical Neuroscience*, 2011; 261(2), 119-123.
30. Compton MT, Frank E, Elon L et al. Changes in U.S. medical students' specialty interests over the course of medical school. *J Gen Intern Med* 2008;23:1095-100.
31. Gat I, Abramowitz MZ, Bentov-Gofrit D et al. Changes in the attitudes of Israeli students at the Hebrew University Medical School toward residency in psychiatry: a cohort study. *Isr J Psychiatry Relat Sci* 2007;44:194-203.
32. Laugharne R, Appiah-Poku J, Laugharne J et al. Attitudes toward psychiatry among final-year medical students in Kumasi, Ghana. *Acad Psychiatry* 2009;33:71-5.
33. Malhi GS, Parker GB, Parker K et al. Shrinking away from psychiatry? A survey of Australian medical students' interest in psychiatry. *Aust N Zeal J Psychiatry* 2002;36:416-23.
34. Pailhez G, Bulbena A, Coll J et al. Attitudes and views on psychiatry: a comparison between Spanish and U.S. medical students. *Acad Psychiatry* 2005;29:82-91.
35. Ong HL, Seow E, Chua BY, Xie H, Wang J, Lau YW, Chong SA, Subramaniam M. Why is psychiatric nursing not the preferred option for nursing students: A cross-sectional study examining pre-nursing and nursing school factors *Nurse Education Today* 52 (2017) 95–102
36. Lambert TW, Turner G, Fazel S et al. Reasons why some UK medical graduates who initially choose psychiatry do not pursue it as a long-term career. *Psychol Med* 2006;36:679-84.
37. Malhi, G. S., Parker, G. B., Carr, V. J., Kirkby, K. C., Yellowlees, P., Boyce, P., et al. Attitudes toward psychiatry among students entering medical school. *Acta Psychiatrica Scandinavica*, 2003;107, 424–429.
38. Tay LH, Ang E and Hegney D. Nurses' perceptions of the barriers to effective communication with inpatient cancer adults in Singapore. *J of Clin Nurs* 2012; 21:2647-58

**Table 1: Characteristics of the study sample**

| Characteristics                                   | n    | %    |
|---------------------------------------------------|------|------|
| <b>Age (mean years, SD)</b>                       | 36.4 | 10.6 |
| <b>Gender</b>                                     |      |      |
| Female                                            | 291  | 63.0 |
| Male                                              | 171  | 37.0 |
| <b>Ethnicity</b>                                  |      |      |
| Chinese                                           | 278  | 60.2 |
| Malay                                             | 36   | 7.8  |
| Indian                                            | 64   | 13.8 |
| Filipino                                          | 59   | 12.8 |
| Myanmar                                           | 16   | 3.5  |
| Others                                            | 9    | 1.9  |
| <b>Marital status</b>                             |      |      |
| Never married                                     | 205  | 44.4 |
| Ever married                                      | 257  | 55.6 |
| <b>Education level</b>                            |      |      |
| Secondary/ ITE/'O' level                          | 18   | 3.9  |
| 'A' level/diploma                                 | 49   | 10.6 |
| Bachelor                                          | 241  | 52.2 |
| Master or above                                   | 154  | 33.3 |
| <b>Residential status</b>                         |      |      |
| Singapore Citizen                                 | 320  | 69.2 |
| Permanent Resident                                | 59   | 12.8 |
| Non Resident                                      | 83   | 18.0 |
| <b>Occupation</b>                                 |      |      |
| Doctor                                            | 58   | 12.6 |
| Nurse                                             | 201  | 43.5 |
| Allied Health                                     | 203  | 43.9 |
| <b>Years worked at Institute Of Mental Health</b> |      |      |
| Less than 1 year                                  | 52   | 11.3 |
| 1-5 years                                         | 195  | 42.2 |
| 6-10 years                                        | 103  | 22.3 |
| More than 10 years                                | 112  | 24.2 |

**Table 2: Model comparisons and fit indices**

| Classes | AIC    | BIC           | CAIC    | ABIC   | Entropy |
|---------|--------|---------------|---------|--------|---------|
| 2       | 711.02 | 806.14        | 829.14  | 733.14 | 0.77    |
| 3       | 617.74 | <b>762.48</b> | 797.48  | 651.40 | 0.80    |
| 4       | 575.42 | 769.79        | 816.79  | 620.63 | 0.78    |
| 5       | 571.02 | 815.02        | 874.02  | 627.77 | 0.79    |
| 6       | 589.06 | 882.69        | 953.69  | 657.35 | 0.68    |
| 7       | 549.33 | 892.58        | 975.58  | 629.16 | 0.78    |
| 8       | 550.76 | 943.64        | 1038.64 | 642.13 | 0.80    |
| 9       | 567.26 | 1009.77       | 1116.77 | 670.18 | 0.80    |

Note: Akaike information criterion (AIC), Bayesian information criterion (BIC), consistent AIC (CAIC), adjusted BIC (ABIC) and entropy all measure model fit. These model comparison measurements were used for choosing the optimal number of classes in latent class analysis, where the models with the smallest values indicate a better fit.

**Table 3: Three latent class model of associative stigma prevalence and item-response probabilities**

|      |                                                                                                                         | Latent class                 |          |         |
|------|-------------------------------------------------------------------------------------------------------------------------|------------------------------|----------|---------|
|      |                                                                                                                         | CLASS 1                      | CLASS 2  | CLASS 3 |
|      |                                                                                                                         | No/low                       | Moderate | High    |
|      |                                                                                                                         | Prevalence                   |          |         |
|      |                                                                                                                         | 48.7%                        | 40.5%    | 10.8%   |
| Item | Statement                                                                                                               | Item response probabilities* |          |         |
| 1    | People react negatively when they know I work in a mental health care setting                                           | 0.46                         | 0.70     | 0.91    |
| 2    | People make jokes about me for working in a mental health care setting                                                  | 0.56                         | 0.65     | 0.91    |
| 3    | I feel ashamed to be working in a mental health care setting                                                            | 0.00                         | 0.00     | 0.39    |
| 4    | I am reluctant to tell people I work in a mental health care setting                                                    | 0.10                         | 0.09     | 0.49    |
| 5    | I have been treated unfairly by others when they learn I work in a mental health care setting                           | 0.04                         | 0.13     | 0.50    |
| 6    | Most people think less of a person who works in a mental health care setting                                            | 0.04                         | 0.86     | 0.77    |
| 7    | Once they know a person works in a mental health care setting, most people will take their opinions less seriously      | 0.00                         | 0.65     | 0.81    |
| 8    | Mental health care contributes to the health of people, families, communities and society in unique and meaningful ways | 0.08                         | 0.15     | 0.60    |
| 9    | The mental health profession lacks a scientific basis                                                                   | 0.16                         | 0.27     | 0.79    |
| 10   | Working in a mental health care setting does not require special skills                                                 | 0.02                         | 0.02     | 0.36    |
| 11   | Mental health work is dangerous                                                                                         | 0.45                         | 0.59     | 0.66    |

\*Item response probability values range from 0 to 1, where numbers closer to 0 represent a low probability of endorsing a specific item, whereas values closer to 1 represent a high probability of endorsing the item.

**Table 4: Socio-demographic correlates of associative stigma among mental health professionals**

|                      |                                     | Moderate Associative Stigma |             |             | High Associative Stigma |             |             |              |              |
|----------------------|-------------------------------------|-----------------------------|-------------|-------------|-------------------------|-------------|-------------|--------------|--------------|
|                      |                                     | Odds Ratio                  | 95% CI      |             | p value                 | Odds Ratio  | 95% CI      |              | p value      |
| Age                  |                                     | 0.98                        | 0.95        | 1.00        | 0.092                   | 0.98        | 0.94        | 1.02         | 0.345        |
| Sex                  | Female                              | Ref                         |             |             |                         |             |             |              |              |
|                      | Male                                | 1.23                        | 0.78        | 1.94        | 0.369                   | 1.18        | 0.57        | 2.43         | 0.655        |
| Residency status     | Singapore Citizen                   | Ref                         |             |             |                         |             |             |              |              |
|                      | Permanent Resident                  | 1.34                        | 0.64        | 2.82        | 0.443                   | 0.72        | 0.21        | 2.48         | 0.607        |
|                      | Non Resident                        | 1.12                        | 0.47        | 2.65        | 0.801                   | 0.36        | 0.08        | 1.66         | 0.189        |
| Ethnicity            | Chinese                             | Ref                         |             |             |                         |             |             |              |              |
|                      | Malay                               | 0.59                        | 0.22        | 1.55        | 0.282                   | 0.97        | 0.29        | 3.26         | 0.965        |
|                      | Indian                              | 1.61                        | 0.80        | 3.27        | 0.186                   | <b>2.97</b> | <b>1.04</b> | <b>8.53</b>  | <b>0.043</b> |
|                      | Filipino                            | 0.88                        | 0.31        | 2.45        | 0.802                   | 3.00        | 0.63        | 14.38        | 0.170        |
|                      | Myanmar                             | 1.69                        | 0.43        | 6.62        | 0.450                   | 0.92        | 0.07        | 11.56        | 0.947        |
|                      | Others                              | 1.13                        | 0.25        | 5.19        | 0.874                   | .           | .           | .            | .            |
| Marital status       | Never married                       | Ref                         |             |             |                         |             |             |              |              |
|                      | Ever married                        | 1.13                        | 0.70        | 1.83        | 0.625                   | 1.06        | 0.48        | 2.37         | 0.885        |
| Education            | Secondary/ 'O/N' level <sup>a</sup> | 3.06                        | 0.77        | 12.10       | 0.111                   | <b>6.18</b> | <b>1.07</b> | <b>35.89</b> | <b>0.042</b> |
|                      | 'A' level <sup>b</sup> & diploma    | 1.61                        | 0.62        | 4.21        | 0.333                   | 2.50        | 0.61        | 10.28        | 0.203        |
|                      | Bachelor                            | 1.22                        | 0.71        | 2.11        | 0.470                   | 1.28        | 0.44        | 3.74         | 0.656        |
|                      | Masters or above                    | Ref                         |             |             |                         |             |             |              |              |
| Occupation           | Doctor                              | <b>2.74</b>                 | <b>1.31</b> | <b>5.71</b> | <b>0.007</b>            | 2.22        | 0.46        | 10.84        | 0.324        |
|                      | Nurse                               | <b>2.44</b>                 | <b>1.29</b> | <b>4.64</b> | <b>0.006</b>            | <b>6.62</b> | <b>2.23</b> | <b>19.63</b> | <b>0.001</b> |
|                      | Allied Health                       | Ref                         |             |             |                         |             |             |              |              |
| Years worked at IMH* | <1 year                             | <b>0.36</b>                 | <b>0.13</b> | <b>0.95</b> | <b>0.040</b>            | 0.23        | 0.03        | 1.71         | 0.151        |
|                      | 1-5 years                           | 0.53                        | 0.25        | 1.09        | 0.083                   | 0.98        | 0.28        | 3.39         | 0.977        |
|                      | 6-10 years                          | <b>0.45</b>                 | <b>0.22</b> | <b>0.92</b> | <b>0.029</b>            | 0.79        | 0.24        | 2.55         | 0.689        |
|                      | >10 years                           | Ref                         |             |             |                         |             |             |              |              |

\*Institute of Mental Health a= 'O' and 'N' levels indicate 10 and 11 years of education, respectively. B= 'A' level indicates 12 years of education.



**Table 5: Relationship between associative stigma and job satisfaction**

|                             | n   | Mean | SD   | Model 1     |        |       | Model 2       |                      |        |       |                  |
|-----------------------------|-----|------|------|-------------|--------|-------|---------------|----------------------|--------|-------|------------------|
|                             |     |      |      | Beta coeff. | 95% CI |       | p value       | Adjusted Beta coeff. | 95% CI |       | p value          |
| No/low associative stigma   | 225 | 7.24 | 1.52 | Ref.        |        |       |               | Ref.                 |        |       |                  |
| Moderate associative stigma | 187 | 7.26 | 1.51 | 0.02        | -0.28  | 0.32  | 0.9132        | -0.18                | -0.49  | 0.12  | 0.2337           |
| High associative stigma     | 50  | 6.46 | 1.79 | -0.78       | -1.26  | -0.30 | <b>0.0013</b> | -1.08                | -1.57  | -0.59 | <b>&lt;.0001</b> |

Ref= Reference group

Model 1 = Simple linear regression

Model 2 = Multiple linear regression after adjusting for socio-demographic correlates including age, gender, ethnicity, residency status, marital status, education, occupation and years worked at Institute of Mental Health

1  
2  
3  
4  
5  
6  
7  
8  
9  
10  
11  
12  
13  
14  
15  
16  
17  
18  
19  
20  
21  
22  
23  
24  
25  
26  
27  
28  
29  
30  
31  
32  
33  
34  
35  
36  
37  
38  
39  
40  
41  
42  
43  
44  
45  
46  
47  
48  
49  
50  
51  
52  
53  
54  
55  
56  
57  
58  
59  
60

For peer review only

1  
2  
3  
4  
5  
6  
7  
8  
9  
10  
11  
12  
13  
14  
15  
16  
17  
18  
19  
20  
21  
22  
23  
24  
25  
26  
27  
28  
29  
30  
31  
32  
33  
34  
35  
36  
37  
38  
39  
40  
41  
42  
43  
44  
45  
46  
47  
48  
49  
50  
51  
52  
53  
54  
55  
56  
57  
58  
59  
60

**Figure 1: 3-class unconditional latent class analysis of associative stigma**

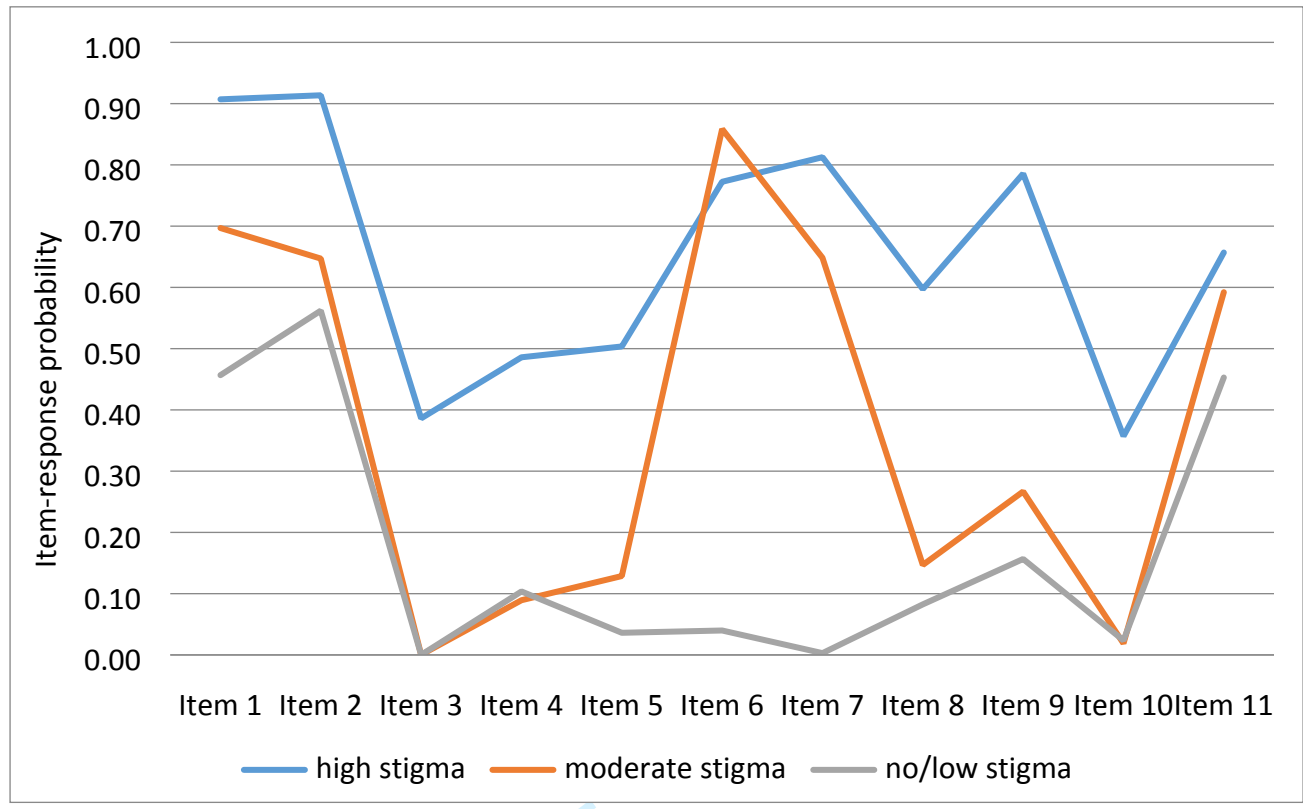

review only

**STROBE 2007 (v4) Statement—Checklist of items that should be included in reports of *cross-sectional studies***

| Section/Topic                | Item # | Recommendation                                                                                                                                                                       | Reported on page # |
|------------------------------|--------|--------------------------------------------------------------------------------------------------------------------------------------------------------------------------------------|--------------------|
| <b>Title and abstract</b>    | 1      | (a) Indicate the study's design with a commonly used term in the title or the abstract                                                                                               | 1                  |
|                              |        | (b) Provide in the abstract an informative and balanced summary of what was done and what was found                                                                                  | 2                  |
| <b>Introduction</b>          |        |                                                                                                                                                                                      |                    |
| Background/rationale         | 2      | Explain the scientific background and rationale for the investigation being reported                                                                                                 | 3                  |
| Objectives                   | 3      | State specific objectives, including any prespecified hypotheses                                                                                                                     | 4                  |
| <b>Methods</b>               |        |                                                                                                                                                                                      |                    |
| Study design                 | 4      | Present key elements of study design early in the paper                                                                                                                              | 5                  |
| Setting                      | 5      | Describe the setting, locations, and relevant dates, including periods of recruitment, exposure, follow-up, and data collection                                                      | 5                  |
| Participants                 | 6      | (a) Give the eligibility criteria, and the sources and methods of selection of participants                                                                                          | 5                  |
| Variables                    | 7      | Clearly define all outcomes, exposures, predictors, potential confounders, and effect modifiers. Give diagnostic criteria, if applicable                                             | 6                  |
| Data sources/<br>measurement | 8*     | For each variable of interest, give sources of data and details of methods of assessment (measurement). Describe comparability of assessment methods if there is more than one group | 6                  |
| Bias                         | 9      | Describe any efforts to address potential sources of bias                                                                                                                            |                    |
| Study size                   | 10     | Explain how the study size was arrived at                                                                                                                                            | 5                  |
| Quantitative variables       | 11     | Explain how quantitative variables were handled in the analyses. If applicable, describe which groupings were chosen and why                                                         | 7                  |
| Statistical methods          | 12     | (a) Describe all statistical methods, including those used to control for confounding                                                                                                | 7                  |
|                              |        | (b) Describe any methods used to examine subgroups and interactions                                                                                                                  |                    |
|                              |        | (c) Explain how missing data were addressed                                                                                                                                          |                    |
|                              |        | (d) If applicable, describe analytical methods taking account of sampling strategy                                                                                                   |                    |
|                              |        | (e) Describe any sensitivity analyses                                                                                                                                                |                    |
| <b>Results</b>               |        |                                                                                                                                                                                      |                    |

|                          |     |                                                                                                                                                                                                                                                                                                                                                                                                               |       |
|--------------------------|-----|---------------------------------------------------------------------------------------------------------------------------------------------------------------------------------------------------------------------------------------------------------------------------------------------------------------------------------------------------------------------------------------------------------------|-------|
| Participants             | 13* | (a) Report numbers of individuals at each stage of study—eg numbers potentially eligible, examined for eligibility, confirmed eligible, included in the study, completing follow-up, and analysed<br>(b) Give reasons for non-participation at each stage<br>(c) Consider use of a flow diagram                                                                                                               | 7-8   |
| Descriptive data         | 14* | (a) Give characteristics of study participants (eg demographic, clinical, social) and information on exposures and potential confounders<br>(b) Indicate number of participants with missing data for each variable of interest                                                                                                                                                                               | 7-8   |
| Outcome data             | 15* | Report numbers of outcome events or summary measures                                                                                                                                                                                                                                                                                                                                                          |       |
| Main results             | 16  | (a) Give unadjusted estimates and, if applicable, confounder-adjusted estimates and their precision (eg, 95% confidence interval). Make clear which confounders were adjusted for and why they were included<br>(b) Report category boundaries when continuous variables were categorized<br>(c) If relevant, consider translating estimates of relative risk into absolute risk for a meaningful time period | 8-9   |
| Other analyses           | 17  | Report other analyses done—eg analyses of subgroups and interactions, and sensitivity analyses                                                                                                                                                                                                                                                                                                                | 8-9   |
| <b>Discussion</b>        |     |                                                                                                                                                                                                                                                                                                                                                                                                               |       |
| Key results              | 18  | Summarise key results with reference to study objectives                                                                                                                                                                                                                                                                                                                                                      | 9-12  |
| Limitations              | 19  | Discuss limitations of the study, taking into account sources of potential bias or imprecision. Discuss both direction and magnitude of any potential bias                                                                                                                                                                                                                                                    | 13-14 |
| Interpretation           | 20  | Give a cautious overall interpretation of results considering objectives, limitations, multiplicity of analyses, results from similar studies, and other relevant evidence                                                                                                                                                                                                                                    | 14-15 |
| Generalisability         | 21  | Discuss the generalisability (external validity) of the study results                                                                                                                                                                                                                                                                                                                                         | 14    |
| <b>Other information</b> |     |                                                                                                                                                                                                                                                                                                                                                                                                               |       |
| Funding                  | 22  | Give the source of funding and the role of the funders for the present study and, if applicable, for the original study on which the present article is based                                                                                                                                                                                                                                                 | 15    |

\*Give information separately for cases and controls in case-control studies and, if applicable, for exposed and unexposed groups in cohort and cross-sectional studies.

**Note:** An Explanation and Elaboration article discusses each checklist item and gives methodological background and published examples of transparent reporting. The STROBE checklist is best used in conjunction with this article (freely available on the Web sites of PLoS Medicine at <http://www.plosmedicine.org/>, Annals of Internal Medicine at <http://www.annals.org/>, and Epidemiology at <http://www.epidem.com/>). Information on the STROBE Initiative is available at [www.strobe-statement.org](http://www.strobe-statement.org).

# BMJ Open

## Associative stigma among mental health professionals in Singapore: a cross-sectional study

|                                 |                                                                                                                                                                                                                                                                                                                                                                                                                                                                                                                                                                                                                                                                                                                                            |
|---------------------------------|--------------------------------------------------------------------------------------------------------------------------------------------------------------------------------------------------------------------------------------------------------------------------------------------------------------------------------------------------------------------------------------------------------------------------------------------------------------------------------------------------------------------------------------------------------------------------------------------------------------------------------------------------------------------------------------------------------------------------------------------|
| Journal:                        | <i>BMJ Open</i>                                                                                                                                                                                                                                                                                                                                                                                                                                                                                                                                                                                                                                                                                                                            |
| Manuscript ID                   | bmjopen-2018-028179.R1                                                                                                                                                                                                                                                                                                                                                                                                                                                                                                                                                                                                                                                                                                                     |
| Article Type:                   | Research                                                                                                                                                                                                                                                                                                                                                                                                                                                                                                                                                                                                                                                                                                                                   |
| Date Submitted by the Author:   | 25-Mar-2019                                                                                                                                                                                                                                                                                                                                                                                                                                                                                                                                                                                                                                                                                                                                |
| Complete List of Authors:       | Picco, Louisa; Institute of Mental Health, Research Division<br>Chang, Sherilyn; Institute of Mental Health, Research Division<br>Abdin , Edimansyah ; Institute of Mental Health, Research Division<br>Chua, Boon Yiang; Institute of Mental Health, Research Division<br>Yuan, Qi; Institute of Mental Health, Research Division<br>Vaingankar, Janhavi; Institute of Mental Health, Singapore, Research<br>Ong, Samantha ; Institute of Mental Health, Nursing<br>Yow, Kah Lai; Institute of Mental Health, Allied Health<br>Chua, Hong Choon; Institute of Mental Health, Chief Executive Office<br>Chong, Siow Ann ; Institute of Mental Health, Research Division<br>Subramaniam, M; Institute of Mental Health, Singapore, Research |
| <b>Primary Subject Heading</b>: | Mental health                                                                                                                                                                                                                                                                                                                                                                                                                                                                                                                                                                                                                                                                                                                              |
| Secondary Subject Heading:      | Health services research, Public health                                                                                                                                                                                                                                                                                                                                                                                                                                                                                                                                                                                                                                                                                                    |
| Keywords:                       | MENTAL HEALTH, PSYCHIATRY, PRIMARY CARE                                                                                                                                                                                                                                                                                                                                                                                                                                                                                                                                                                                                                                                                                                    |
|                                 |                                                                                                                                                                                                                                                                                                                                                                                                                                                                                                                                                                                                                                                                                                                                            |

SCHOLARONE™  
Manuscripts

**Title: Associative stigma among mental health professionals in Singapore: a cross-sectional study**

**Authors:**

Louisa Picco\*, [louisa.picco@gmail.com](mailto:louisa.picco@gmail.com)

Sherilyn Chang\*, [Sherilyn\\_Sh\\_CHANG@imh.com.sg](mailto:Sherilyn_Sh_CHANG@imh.com.sg)

Edimansyah Abdin\*, [edimansyah\\_abdin@imh.com.sg](mailto:edimansyah_abdin@imh.com.sg)

Boon Yiang Chua\*, [boon\\_yiang\\_chua@imh.com.sg](mailto:boon_yiang_chua@imh.com.sg)

Qi Yuan\*, [Qi\\_YUAN@imh.com.sg](mailto:Qi_YUAN@imh.com.sg)

Janhavi Ajit Vaingankar\*, [janhavi\\_vaingankar@imh.com.sg](mailto:janhavi_vaingankar@imh.com.sg)

Samantha Ong<sup>a</sup>, [samantha\\_ong@imh.com.sg](mailto:samantha_ong@imh.com.sg)

Kah Lai Yow<sup>b</sup>, [kah\\_lai\\_yow@imh.com.sg](mailto:kah_lai_yow@imh.com.sg)

Hong Choon Chua<sup>c</sup>, [Hong\\_Choon\\_Chua@imh.com.sg](mailto:Hong_Choon_Chua@imh.com.sg)

Siow Ann Chong\*, [siow\\_ann\\_chong@imh.com.sg](mailto:siow_ann_chong@imh.com.sg)

Mythily Subramaniam\*, [mythily@imh.com.sg](mailto:mythily@imh.com.sg)

\* Research Division, Institute of Mental Health, Singapore

<sup>a</sup> Nursing Administration, Institute of Mental Health, Singapore

<sup>b</sup> Clinical and Allied Health Professionals Services, Institute of Mental Health, Singapore

<sup>c</sup> Chief Executive Office, Institute of Mental Health, Singapore

**Corresponding author:**

Louisa Picco

Manager, Research Division

Institute of Mental Health

Buangkok Green Medical Park

10 Buangkok View

Singapore 539747

Email: [louisa.picco@gmail.com](mailto:louisa.picco@gmail.com)

## ABSTRACT

**Objectives:** (i) Investigate and explore whether different classes of associative stigma (the process by which a person experiences stigmatization as a result of an association with another stigmatized person) could be identified using latent class analysis; (ii) Determine the socio-demographic and employment related correlates of associative stigma; and (iii) Examine the relationship between associative stigma and job satisfaction, among mental health professionals.

**Design:** Cross-sectional online survey

**Participants:** Doctors, nurses and allied health staff, working in Singapore

**Methods:** Staff (n=462) completed an online survey which comprised 11 associative stigma items and also captured socio-demographic and job satisfaction related information. Latent class analysis was used to classify associative stigma upon patterns of observed categorical variables. Multinomial logistic regression was used to examine associations between socio-demographic and employment related factors and the different classes, while multiple linear regression analyses was used to examine the relationship between associative stigma and job satisfaction.

**Results:** The latent class analysis revealed that items formed a 3-class model where the classes were classified as 'no/low associative stigma', 'moderate associative stigma' and 'high associative stigma'. 48.7%, 40.5% and 10.8% of the population comprised no/low, moderate and high associative stigma classes, respectively. Multinomial logistic regression showed that years of service and occupation were significantly associated with moderate associative stigma, while factors associated with high associative stigma were education, ethnicity and occupation. Multiple linear regression analyses revealed that high associative stigma was significantly associated with lower job satisfaction scores.

**Conclusion:** Associative stigma was not uncommon among mental health professionals and was associated with various socio-demographic factors and poorer job satisfaction. Associative stigma has received comparatively little attention from empirical researchers and continued efforts to address this under-studied yet important construct in conjunction with future efforts to dispel misconceptions related to mental illnesses are needed.

**Key words:** associative stigma, latent class analysis, mental health, doctors, nurses, allied health staff



## ARTICLE SUMMARY

### Strengths and limitations of the study

- This is the first study to explore associative stigma among mental health professionals in Asia.
- Latent class analysis was used to classify associative stigma upon patterns of observed categorical variables.
- Multinomial logistic regression and multiple linear regression analyses were used to examine associations between socio-demographic factors and associative stigma and the relationship between associative stigma and job satisfaction.
- The study has some limitations including the cross-sectional design, it may be subjected to social desirability bias and it lacks generalisability due to inclusion criteria.

### INTRODUCTION

Stigma is a complex and multi-faceted construct and often results from misunderstandings and perceptions society has about people with mental illnesses. Link and Phelan describe stigma as an overarching construct that exists when five interrelated components occur: (1) labelling, (2) negative attributes, (3) separation (4) status loss and (5) discrimination [1]. People with mental illnesses are frequently viewed or labeled as incompetent, irresponsible, unpredictable, and dangerous [2]. The consequences of this prejudice and discrimination can result in people with mental illnesses avoiding care and treatment, preferring denial or choosing not to disclose their condition [3]. This can then have damaging effects to other aspects of their lives including employment and job opportunities, relationships, housing opportunities, life satisfaction as well as self-esteem and self-efficacy [4-7]. The impact of stigma is significant not only for people with mental illnesses, but also their families, caregivers, and even health professionals providing mental health care.

To date there has been extensive literature surrounding stigma towards those with a mental illness however stigma does not only affect those who are being stigmatized but can also emanate from close association to these people. Associative stigma otherwise referred to as affiliate stigma, courtesy stigma or secondary stigma describes the process by which a person experiences stigmatization as a result of an association with another stigmatized person [3,8]. This stigma by association may be experienced by parents, spouses, siblings, children, friends, caregivers or co-workers of the stigmatized. More recently, there has been a growing interest in associative stigma experienced by mental health professionals, whereby they or the psychiatric

1  
2  
3 discipline is judged along the same stigmatizing stereotypes as their patients [9]. Negative and  
4 stigmatizing beliefs relating to mental health professionals not only discredit the valuable  
5 contributions these individuals make, but more importantly, these beliefs discredit the needs of  
6 people who access mental healthcare. Furthermore, negative perceptions of mental health  
7 professionals may in fact further exacerbate the stigma of mental illnesses [8].  
8  
9  
10

11  
12 There is a dearth of literature concerning associative stigma experienced by mental health care  
13 professionals. **Verhaeghe and Bracke [10]** investigated the link between associative stigma and  
14 burnout and job satisfaction among mental health professionals in Belgium, and found that  
15 associative stigma was related to more depersonalization, more emotional exhaustion, and less  
16 job satisfaction. In a second study, **Ben Natan et al., [11]** compared attitudes and stigma among  
17 psychiatric and non-psychiatric nurses in Israel and found that non-psychiatric nurses held more  
18 stigmatizing views towards mental illnesses, individuals with a mental illness and the role of  
19 psychiatric nursing, although associative stigma did not differ between the two groups. A recent  
20 qualitative study among mental health clinicians from varying professional backgrounds including  
21 allied health staff, psychiatrists and law enforcement, found that these professionals commonly  
22 endorsed experiences of associative stigma from community members [12]. There have also  
23 been a few earlier studies which have explored associative stigma among nurses [8,13, 14], whilst  
24 to our knowledge, besides the qualitative study described above, there has only been one other  
25 study that included allied health staff working in mental health care [10], and none of which have  
26 been undertaken in Asian settings. Less is therefore known about the extent of associative stigma  
27 amongst health professionals working in Asia and how this may compare to Western cultures.  
28  
29  
30  
31  
32  
33  
34  
35  
36  
37  
38

39 At the time this study was conducted, there was no developed or validated tool to measure  
40 associative stigma and accordingly comparisons across studies are difficult. A recent study  
41 however has explored the validity and factor structure of associative stigma via the Clinician  
42 Associative Stigma Scale (CASS) [15]. Findings revealed that amongst a sample of clinicians in  
43 the US, the CASS displayed good internal consistency and evidence of convergent validity and  
44 is an effective tool for measuring associative stigma among mental health professionals who work  
45 with people with serious mental illness. A second study, has also validated this scale amongst a  
46 sample of clinicians in China, with results revealing how cultural differences can impact  
47 associative stigma [16].  
48  
49  
50  
51  
52  
53  
54

55 The current study investigated associative stigma experienced by staff working at the Institute of  
56  
57

1  
2  
3 Mental Health (IMH). IMH is the only tertiary psychiatric hospital in Singapore and encompasses  
4 a 2000 bed in-patient facility as well as specialist outpatient clinics and employs over 1500  
5 doctors, nurses and allied health staff including psychologists, pharmacists, occupational  
6 therapists, physiotherapists, case managers and medical social workers. The aims of this study  
7 were to: (i) investigate and explore whether different classes of associative stigma could be  
8 identified using latent class analysis; (ii) determine the socio-demographic and employment  
9 related correlates of associative stigma; and (iii) examine the relationship between associative  
10 stigma and job satisfaction, among mental health professionals (doctors, nurses, psychologists,  
11 pharmacists, occupational therapists, physiotherapists, case managers, counselors and medical  
12 social workers) working at IMH.  
13  
14  
15  
16  
17  
18  
19

20  
21 In order to explore associative stigma in the current study, latent class analysis was used.  
22 Previous research has mainly been conducted to develop and validate stigma scales that  
23 measure stigma towards those with a mental illness. However, much of this research has  
24 validated these scales using a variable-centered approach, such as exploratory and confirmatory  
25 factor analysis. Such methods measure stigma as a total community or population score and this  
26 mean score may not give the full picture of the complex phenomena of stigma, which is often  
27 multi-faceted within individuals and populations [17].  
28  
29  
30  
31  
32

33 An alternative approach that can enhance understanding of the varying characteristics and levels  
34 of stigma within a population is latent class analysis. Latent class analysis is a respondent-  
35 centered approach that aims to group individuals into class groups based on their responses to a  
36 set of observed variables. It has been widely used in behavioural and social science research to  
37 uncover unobserved heterogeneity in a population and to find substantively meaningful groups of  
38 people that are similar in their responses to measured variables or growth trajectories [18]. Once  
39 individuals are assigned to their most likely class, based on their responses to observed variables,  
40 it is then possible to examine other features such as socio-demographic correlates of each class,  
41 to determine predictors of these classes [19].  
42  
43  
44  
45  
46  
47  
48

## 49 **METHODS**

### 50 **Participants and procedure**

51 All doctors, nurses and allied health staff (psychologists, pharmacists, occupational therapists,  
52 physiotherapists, case managers and medical social workers) working at IMH were invited to  
53 participate in the survey, which was administered via Questionpro, an online survey application.  
54  
55  
56  
57

1  
2  
3 Staff were informed of the study and the inclusion criteria via email and were sent a link to the  
4 online survey. Inclusion criteria required respondents to be: (i) Singapore citizens, permanent  
5 residents or foreigners with an employment or work permit; (ii) doctors, nurses, or allied health  
6 staff currently working at IMH and; (iii) aged 21 years and above. Staff who were willing to  
7 participate in the survey were required to read and accept an online consent form thus indicating  
8 their willingness and consent to participate in the study.  
9  
10  
11  
12

13  
14 In order to explore employment related correlates such as occupation, it was estimated that a  
15 sample size of approximately 200 nurses and 200 allied health staff would be needed to explore  
16 differences in associative stigma amongst the two groups, where sample size calculations were  
17 performed using PS (power and sample size calculation) software for comparing means. As  
18 reported in a previous study, Natan et al [11] found there to be significant mean difference in  
19 stigma scores between psychiatric and non psychiatric nurses, with psychiatric nurses having  
20 more positive attitudes towards mental illness (mean= 2.5; SD= 0.76 versus mean = 2.25; SD=  
21 0.71), individuals with mental illness (mean= 3.33; SD= 0.6) versus mean= 3.57; SD=0.7) and the  
22 role of psychiatric nursing (mean=1.79; SD=0.6 versus mean=2.5; SD=0.5). Assuming a  
23 significance level at p value less than 0.05 and 80% power of the study, the minimum sample size  
24 required to replicate these analysis is 146 subjects per group (i.e., Group 1= nurses and Group  
25 2= allied health (psychologists, pharmacists, occupational therapists, physiotherapists, case  
26 managers, counselors and medical social workers)). Taking into account a 40% rate of incomplete  
27 or partial completion a sample size of 200 per group (400 in total) was required. Accordingly, once  
28 this limit was reached, subsequent staff who wished to participate in the survey were sent a  
29 message informing them recruitment had ceased. Data were collected between February and  
30 April 2016, with a total of 470 participants completing the study; eight cases were removed due  
31 to unreliable data or staff not meeting the inclusion criteria. Ethical approval was obtained from  
32 the Domain Specific Review Board of the National Healthcare Group, Singapore.  
33  
34  
35  
36  
37  
38  
39  
40  
41  
42  
43  
44  
45

#### 46 **Patient and public involvement**

47 There was no patient or public involvement in the study design, however staff at IMH will be  
48 informed of the study findings.  
49  
50

#### 51 **Measures**

52 At the time this study was conducted, there was no developed and validated instrument which  
53 measured associative stigma. Two recent studies [10,11] derived items to measure associative  
54  
55  
56  
57

1  
2  
3 stigma, based on their own literature reviews. Modified versions of some of these items were used  
4 and additional items were also added based on our own literature review. Five items were  
5 answered using a 5-point Likert scale (i.e Never, Rarely, Sometimes, Often, All the time) [10]:  
6

- 7 1. People react negatively when they know I work in a mental health care setting<sup>1</sup>
- 8 2. People make jokes about me for working in a mental health care setting<sup>1</sup>
- 9 3. I feel ashamed to be working in a mental health care setting<sup>1</sup>
- 10 4. I am reluctant to tell people I work in a mental health care setting<sup>1</sup>
- 11 5. I have been treated unfairly by others when they learn I work in a mental health care setting.
- 12
- 13
- 14
- 15
- 16

17 An additional six items were answered using the following response categories and similar to  
18 those used by Ben Natan et al., [11]: Strongly agree (1); Slightly agree (2); Neither agree nor  
19 disagree (3); Slightly disagree (4); Strongly disagree (5). Items included:  
20

- 21 1. Most people think less of a person who works in a mental health care setting
- 22 2. Once they know a person works in a mental health care setting, most people will take their  
23 opinions less seriously
- 24 3. Mental health care contributes to the health of people, families, communities and society in  
25 unique and meaningful ways<sup>2</sup>
- 26 4. The mental health profession lacks a scientific basis<sup>2</sup>
- 27 5. Working in a mental health care setting does not require special skills<sup>2</sup>
- 28 6. Mental health work is dangerous<sup>2</sup>.
- 29
- 30
- 31
- 32
- 33
- 34
- 35

36 Socio-demographic information was captured including age, gender, ethnicity, marital and  
37 residency status and education. In addition, staff were asked to indicate how long they had worked  
38 at IMH, their occupation, and to rate their job satisfaction on a scale from 1-10, where 1 indicated  
39 they were very dissatisfied and 10 indicated very satisfied.  
40  
41  
42  
43

#### 44 **Statistical analysis**

45 All statistical analyses were done using SAS 9.2 (SAS Institute, Cary, North Carolina, USA). Mean  
46 and standard deviations were calculated for continuous variables, and frequencies and  
47 percentages for categorical variables. Missing data were very low (0.2 to 0.6%) and only in relation  
48 to associative stigma items. Listwise deletion methods were applied for all analyses.  
49  
50  
51  
52  
53

---

54 <sup>1</sup> Items were based on Verhaeghe et al., 2012

55 <sup>2</sup> Items were based on Ben Natan et al., 2015

### *Latent class analysis*

Latent class analysis was used to classify associative stigma upon patterns of observed categorical variables. Latent class analysis is a “respondent-centered” approach that seeks to group individuals into “classes” based on their responses to a set of items [19], and in this case, their responses to 11 associative stigma items. All items responses were dichotomized (strongly agree, slightly agree, often, sometimes or all the time were combined as one category while neither agree nor disagree, slightly disagree, strongly disagree, never or rarely were combined as one category). Latent class analysis is a mixture model that posits that there is an underlying unobserved categorical variable (i.e associative stigma) that divides a population into mutually exclusive and exhaustive latent classes. It is used to identify homogeneous subgroups, which share a common pattern of responses within a heterogeneous population. It relates a set of observed categorical variables to a set of latent variables. A latent class model with the optimal number of classes was determined using model fit statistics, including the likelihood ratio  $G^2$ , Akaike information criterion (AIC, smallest value preferred) and Bayesian information criterion (BIC, smallest value preferred), entropy (highest value preferred) values and interpretability of the derived classes [20]. All latent class analyses were conducted by PROC LCA in SAS 9.4 software.

### *Multinomial logistic regression*

Multinomial logistic regression was used to examine associations between socio-demographic factors including age, gender, ethnicity, marital and residency status, education, years of employment and occupation and the different classes. Multinomial logistic regression analysis was chosen as it is an appropriate statistical test when analyzing outcome variables with more than 2 categories. We also used multiple linear regression analyses to examine the relationship between associative stigma and job satisfaction with and without adjustment for socio-demographic correlates. Statistical significance were reported at  $p < 0.05$ .

## **RESULTS**

The distribution of socio-demographic characteristics is presented in Table 1. The sample ( $n=462$ ) comprised 58 doctors, 201 nurses and 203 allied health staff. The majority were female (63%), Chinese (60.2%) and had been working at IMH between one and five years (42.2%).



1  
2  
3 Eight unconditional models ranging from two to nine classes were compared to one another using  
4 fit statistics to determine the appropriate class structure (Table 2). The AIC value was lowest for  
5 the 7-class model (AIC=549.33) and the BIC value was lowest for the 3-class model  
6 (BIC=762.48), followed by 4-class model (BIC=769.79). The BIC value typically is considered a  
7 better measure of model fit because it penalizes for model complexity more than the AIC [20]. A  
8 careful examination of both the 3 and 4-class model solutions led us to select the 3-class model  
9 because it was more easily identified, had greater parsimony, and its parameter estimates  
10 presented a solution with a more interpretable and distinct set of classes than the 3-class model  
11 (Figure 1).  
12  
13  
14  
15  
16  
17  
18

19 The parameter estimates depicted in Figure 1 and Table 3 provide the 3-class model of  
20 associative stigma prevalence and item-response probability (IRP). IRP values range from 0 to 1,  
21 where numbers closer to 0 represent a low probability of endorsing a specific associative stigma  
22 item, whereas values closer to 1 represent a high probability of endorsing the item. Each class  
23 then consists of different probabilities of endorsement for each of the 11 associative stigma items.  
24 For example, the first latent class is characterized by a low IRP of endorsing the following items:  
25 “I feel ashamed to be working in a mental health care setting”(Item 3), “I am reluctant to tell people  
26 I work in a mental health care setting” (Item 4), “I have been treated unfairly by others when they  
27 learn I work in a mental health care setting” (Item 5), “Most people think less of a person who  
28 works in a mental health care setting” (Item 6), “Once they know a person works in a mental health  
29 care setting, most people will take their opinions less seriously” (Item 7), “Mental health care  
30 contributes to the health of people, families, communities and society in unique and meaningful  
31 ways” (Item 8), “The mental health profession lacks a scientific basis” (Item 9) and “Working in a  
32 mental health care setting does not require special skills” (Item 10). The IRP ranged from 0.001  
33 to 0.16, thus we labeled this subgroup “no/low associative stigma”. Class 2 comprised staff who  
34 were more likely to report higher response probabilities for items 1 (“People react negatively when  
35 they know they work in a mental health care setting”), 2 (“People make jokes about me for working  
36 in a mental health care setting”), 7 and 11 (“Mental health work is dangerous”) than the “no/low  
37 stigma” and accordingly, we labeled this class as “moderate associative stigma”. Finally, the high  
38 probability of endorsing “sometimes”, “often” or “all the time” to items 1 and 2, and “strongly agree”  
39 or “slightly agree” to items 6, 7, 8, 9 and item 11 (IRP ranges from 0.66 to 0.91) were associated  
40 with class 3, which was labeled as “high associative stigma”. Within these three class groups,  
41 48.7%, 40.5% and 10.8% of the population comprised no/low, moderate and high associative  
42 stigma classes, respectively.  
43  
44  
45  
46  
47  
48  
49  
50  
51  
52  
53  
54  
55  
56  
57  
58  
59  
60

1  
2  
3  
4  
5 The results of the multinomial logistic regression for the moderate and high associative stigma  
6 groups, with low stigma as the reference group are presented in Table 4. We found that staff  
7 working at IMH for less than one year ( $p=0.040$ ), and between six and ten years ( $p=0.029$ ) were  
8 less likely to have moderate associative stigma (versus staff working at IMH for more than 10  
9 years). Occupation was also a significant predictor; doctors ( $p=0.007$ ) and nurses ( $p=0.006$ ) were  
10 significantly more likely to experience moderate associative stigma compared to allied health staff.  
11 Factors associated with high associative stigma were lower education ( $p=0.042$ ), Indian ethnicity  
12 ( $p=0.043$ ) and being a nurse ( $p=0.001$ ).  
13  
14  
15  
16  
17  
18

19 Table 5 shows the results from multiple linear regression analyses. After adjusting for socio-  
20 demographic variables, high associative stigma remained significantly associated with lower job  
21 satisfaction scores ( $p<0.0001$ ).  
22  
23  
24

## 25 DISCUSSION

26 There is paucity in the current literature which investigates associative stigma experienced by  
27 mental health professionals. This is the first study to examine associative stigma among mental  
28 health professionals using latent class analysis and endeavors to expand and build our knowledge  
29 and understanding of the patterns of associative stigma amongst each of the classes. The findings  
30 reveal that among the study sample, three distinct classes exist; no/low, moderate and high  
31 associative stigma which were associated with unique socio-demographic correlates. Moderate  
32 associative stigma was significantly associated with years of service and occupation, while high  
33 associative stigma was associated with Indian ethnicity, lower education and occupation.  
34  
35  
36  
37  
38  
39  
40

41 Findings revealed that 48.7%, 40.5% and 10.8% of staff working at a psychiatric hospital  
42 experienced no/low, moderate and high associative stigma, respectively. Whilst almost half of the  
43 staff experienced no or low associative stigma (48.7%), the remaining experienced moderate or  
44 high associative stigma, which is of concern. The moderate associative stigma class comprised  
45 staff who were more likely to report higher response probabilities for the following items “People  
46 react negatively when they know they work in a mental health care setting”, “People make jokes  
47 about me for working in a mental health care setting”, “Once they know a person works in a mental  
48 health care setting, most people will take their opinions less seriously” and “Mental health work is  
49 dangerous”. These items are similar to those in the CASS scale which comprised items relating  
50 to the negative perceptions and stereotypes of mental healthcare, psychiatry and people with  
51  
52  
53  
54  
55  
56  
57



1  
2  
3 mental illnesses and people's reluctance to disclose working in this field [15]. These items relate  
4 largely to how other people perceive them and how they react towards them as a result of their  
5 profession and therefore efforts to better educate the general population as well as interventions  
6 targeting medical and nursing students are needed to dispel such misconceptions and stigma  
7 surrounding psychiatry and mental health care [21]. High associative stigma comprised staff that  
8 were also more likely to endorse items about other people's reactions however it also  
9 encompassed items about the mental health profession including "The mental health profession  
10 lacks a scientific basis" and "Working in a mental health care setting does not require special  
11 skills". Given the higher positive endorsement of the latter items, this indicates that even among  
12 mental health professionals, there is a level of stigma, uncertainty and even negative perceptions  
13 relating to mental health care and psychiatry and similar findings have also been previously  
14 reported [9,11]. It is therefore possible that a consequence of experiencing ongoing associative  
15 stigma, results in these staff holding more discriminatory views, whereby they internalize this  
16 stigma or may have higher perceived stigma. Efforts within mental health care are needed to build  
17 self-esteem and self-confidence, whilst at the same time, taking the opportunity to highlight  
18 success stories in mental health to the public more frequently [22].  
19  
20  
21  
22  
23  
24  
25  
26  
27  
28  
29

30 Various socio-demographic differences were associated with moderate and high associative  
31 stigma. For example, Indians (compared to Chinese) were nearly three times more likely to  
32 experience high associative stigma. Whilst it is difficult to postulate why this may be, some  
33 possible explanations are provided. Firstly, high associative stigma was associated with higher  
34 probability of endorsing positive responses to items relating to (i) how staff perceive the mental  
35 health profession and (ii) how people react towards them. Regarding the latter, we do not know  
36 about the specific people stigmatizing these staff and therefore gaining a greater understanding  
37 of the types of people that judge and stigmatize mental health professionals would allow future  
38 anti-stigma efforts to be targeted towards these population sub-groups. For the former (how staff  
39 perceive the mental health profession), this relates to the individual's own personal views,  
40 whereby they perceive the discipline lacks a scientific basis, the profession doesn't require special  
41 skills or that mental health care doesn't contribute to the health of people, families and  
42 communities in a meaningful way. This could be an embedded cultural belief where in India  
43 psychiatry is still not considered an important medical specialty due to societal apprehensions  
44 and ignorance [23]. This is further substantiated by a recent study among a general population  
45 sample in India which found that one third of participants believed that psychiatrists specialize in  
46 psychiatry because they are not good enough for other specialties [24]. Mental illness stigma  
47  
48  
49  
50  
51  
52  
53  
54  
55  
56  
57

1  
2  
3 needs to be studied within its sociocultural context in order to understand its origins, meanings  
4 and consequences [25] and in doing so, this may provide great insight into the ethnic differences  
5 observed in relation to associative stigma.  
6  
7

8  
9 Given the study sample comprised doctors, nurses and allied health professionals, the  
10 overwhelming majority were highly educated, with over 85% having a tertiary qualification or  
11 higher. Those with the least education, which still equates to approximately 10-11 years of  
12 education, were six times more likely to experience high associative stigma and these findings  
13 resonate with those of a recent study which also explored associative stigma among mental health  
14 professionals in China and the US [16]. Research locally and internationally has shown that those  
15 who are less educated tend to hold more stigmatizing views towards the mentally ill [26,27,28].  
16 Whilst these studies are related to stigma towards people with a mental illness and not stigma by  
17 association, the two are inter-related and therefore could explain this finding. Another possible  
18 explanation could be that those working in mental healthcare are perceived to not 'require special  
19 skills' and therefore those with lower education are predominantly working in this profession.  
20 Alternatively, given that high associative stigma was related to a higher likelihood of positively  
21 endorsing items such as "The mental health profession lacks a scientific basis" and "Working in  
22 a mental health care setting does not require special skills" this may suggest that staff with less  
23 education perceive that being highly educated is not essential to this profession.  
24  
25  
26  
27  
28  
29  
30  
31  
32  
33

34  
35 The number of years of service in a mental health hospital was associated with moderate  
36 associative stigma. Staff working at the psychiatric hospital for less than one year and those with  
37 6-10 years of service, were less likely to experience moderate associative stigma, compared to  
38 those with over 10 years of service, whilst no significant differences were observed for those with  
39 1-5 years of service. For newer staff (less than one year), their association via a professional  
40 capacity with people who have a mental illness would be minimal compared to those with over 10  
41 years of experience. Therefore they would have only been exposed to possible associative stigma  
42 for this short period and hence less likely to experience any form of stigma, discrimination or  
43 prejudice. It is difficult however to postulate why staff with 6-10 years of service would experience  
44 less moderate associative stigma, versus those with over 10 years of service. **Halter [8]** in her  
45 study among nurses found that age was positively correlated with viewing psychiatric nurses as  
46 skilled, logical, dynamic and or respected. The author speculated that years of experience  
47 increased the likelihood of contact with people with a mental illness, thus mediating the influence  
48 of stigmatizing attitudes [29]. We predicted, that as a result of working in mental healthcare for  
49  
50  
51  
52  
53  
54  
55  
56  
57

1  
2  
3 an extended period, staff would no longer be confronted with associative stigma and people would  
4 be less likely to 'react negatively' or 'make jokes' about where they work, whilst at the same time  
5 they would be 'acclimatized' to working in this setting. It could also be a result of some form of  
6 'stigma resistance', whereby these staff can resist or ignore the stigma associated with their  
7 profession, however this does not explain why staff with 6-10 years of service are less likely to  
8 experience associative stigma compared to those with over 10 years of service. Further research  
9 exploring the impact of the number of years or experience in mental health care and associative  
10 stigma are needed.  
11  
12  
13  
14  
15

16  
17 The strongest predictor of moderate and high associative stigma was occupation. Nurses were  
18 significantly more likely to experience both moderate and high associative stigma, while doctors  
19 were significantly more likely to experience moderate associative stigma, when compared to allied  
20 health staff. Numerous studies have recently investigated stigma towards mental health nursing  
21 **[13,30]**, psychiatrists **[31,32]** and the discipline of psychiatry and mental health in general **[22,33]**  
22 which is often perpetuated by nurses, doctors, medical and nursing students and health  
23 professionals working in other sectors, as well as the general public **[29]**. Studies among medical  
24 students have shown that the overall status of psychiatry is low **[21]**, where perceived low prestige  
25 and low respect among other medical disciplines are among the main reasons for not choosing  
26 psychiatry **[34-38]**. Similarly, a recent study among nursing students in Singapore found that only  
27 5.2% of students would 'definitely decide to do' psychiatric nursing **[39]**. A study among doctors  
28 which assessed reasons why they left the specialty they had initially chosen found that among  
29 psychiatrists, the most common reasons reported included the specialty's poor public image and  
30 the perceived lack of respect among other doctors **[40]**. It is therefore possible that for some  
31 doctors, psychiatry was not their first preference, whilst for others the sense of being 'looked down  
32 upon' by other health professionals resulted in increased associative stigma.  
33  
34  
35  
36  
37  
38  
39  
40  
41  
42  
43

44 Several studies among nurses and nursing students have found that psychiatry is ranked as one  
45 of the least preferred, attractive and respected disciplines in nursing **[8,41]**. Halter **[8]** explored  
46 the characteristics attributed to nurses in multiple disciplines, where psychiatric nurses were often  
47 described as unskilled, illogical, idle and disrespected. Whilst it could not be concluded whether  
48 these attitudes and perceptions were a consequence of associative stigma, such perceptions  
49 about nurses working at the only tertiary psychiatric hospital in Singapore could explain why  
50 nurses were significantly more likely to experience associative stigma. An alternative explanation  
51 could be related to how nurses are perceived. Previous research in Singapore has shown that  
52  
53  
54  
55  
56  
57

1  
2  
3 the local population often possesses low perceptions of nurses [42], which may further  
4 exacerbate the stigma they experience.  
5  
6

7  
8 It is also possible that this stigma experienced by psychiatrists and nurses operates in two  
9 directions; the first being the stereotypic attitudes or perceptions projected out by them, whilst the  
10 second is the associated attributes projected on them, which they may internalize [14].  
11 Irrespective of the type of stigma, it is important that mental health professionals are aware of this  
12 and how this may impact their role and work-related tasks. In order to address moderate and high  
13 associative stigma associated with nurses and psychiatrists, these mental health professionals  
14 need to explore and challenge such cases of stigma experienced by them. Associative stigma not  
15 only devalues the individual but also the profession as a whole and therefore mental health  
16 professionals play an important role in dispelling stigma related to mental illnesses [14].  
17  
18  
19  
20  
21  
22

23  
24 Associative stigma was found to be associated with job satisfaction. After adjusting for socio-  
25 demographic correlates, we found that high associative stigma was associated with poorer job  
26 satisfaction. **Verhaeghe and Bracke [10]** found associative stigma was associated with  
27 depersonalization and emotional exhaustion among mental health professionals in Belgium, with  
28 the latter leading to decreased job satisfaction. The consequences of stigma in relation to job  
29 satisfaction have been well documented. Similarly, associative stigma among mental health  
30 professionals, can contribute to job stress and poorer outcomes not only in terms of staff well-  
31 being but the quality of care provided to patients and therefore the implications can be detrimental  
32 to both staff and their patients. Due to the cross-sectional nature of this study, the relation between  
33 job satisfaction and associative stigma could be bi-directional and therefore exploring this  
34 association over time would be beneficial.  
35  
36  
37  
38  
39  
40  
41

42  
43 The findings of this study should be viewed in light of the following limitations. Firstly, at the time  
44 the study was conducted, there was no developed and validated psychometric associative stigma  
45 measure, and therefore items used to measure associative stigma were based on previous  
46 research. Whilst such items have previously been used to measure associative stigma among  
47 various health care professionals, the settings have varied and therefore a detailed pilot or expert  
48 review in the local setting, would have been beneficial. There are now psychometric instruments  
49 that do measure associative stigma such as the CASS, which have been validated in various  
50 populations and are contributing to what was an under researched field. This was a cross-  
51 sectional study among staff working at IMH and therefore these findings are not generalizable to  
52  
53  
54  
55  
56  
57

1  
2  
3 all mental health professionals in Singapore, nor could causal relationships be established.  
4 However, given that this hospital is the primary provider of tertiary psychiatric care in Singapore,  
5 and all staff included in the study are involved with the care of patients with a mental illness, it  
6 provides valuable insight into the stigma associated with the mental health profession. The study  
7 was limited to doctors, nurses and allied health staff and therefore associative stigma of other  
8 staff including health care attendants, patient services associates and administrative staff was not  
9 gathered and may differ. Data were not collected on response rates, but rather once the desired  
10 quota of nurses and allied health staff was reached (i.e 200 of each group) recruitment ceased,  
11 therefore it is difficult to ascertain the degree of selection bias. Furthermore, data was not  
12 collected on those people that were invited to participate but chose not to respond and therefore  
13 it is possible that responders and non-responders experiences of associative stigma may differ.  
14 The invitation emails were sent to eligible staff through their institution email addresses. Data collected  
15 were based on self-report and therefore respondents may have provided socially desirable  
16 responses or may not have felt comfortable disclosing possible stigma they may have  
17 experienced. Finally, it is important to acknowledge that stigma in general is a complex and multi-  
18 faceted construct which has been theorised and defined in many ways and can present in different  
19 forms such as personal stigma, perceived stigma, self-stigma, structural stigma or associative  
20 stigma. This in itself poses various challenges as there may be some overlap in these constructs  
21 and how they are measured.  
22  
23  
24  
25  
26  
27  
28  
29  
30  
31  
32  
33  
34

35 These limitations notwithstanding, this is one of just a few studies to explore associative stigma  
36 among mental health professionals, and to our knowledge the only study to explore this within an  
37 multi-ethnic Asian setting, and has thus added to the existing sparse literature. Using latent class  
38 analysis, the current study has provided a greater understanding of the extent of associative  
39 stigma among psychiatrists, nurses and allied health staff working at a psychiatric hospital. A 3-  
40 class model of associative stigma was found to have the best fit, where classes were labeled as  
41 no/low, moderate and high associative stigma. Based on these classes, it would be beneficial to  
42 further explore this construct via longitudinal studies or repeatedly measuring associative stigma  
43 over time to compare outcomes such as quality of life and burnout, as well as different types of  
44 job satisfaction across the different classes in order to determine effective interventions to reduce  
45 associative stigma among mental health professionals. At the same time, there is also a scarcity  
46 of literature relating to the development and evaluation of interventions to combat stigma  
47 experienced by health professionals [21]. Research has however shown that increment or  
48  
49  
50  
51  
52  
53  
54  
55  
56  
57  
58  
59  
60

1  
2  
3 improvement in knowledge as well as actual contact with people who have a mental illness can  
4 help to reduce stigma, whilst improving the image of psychiatry and psychiatrists [22].  
5  
6  
7

8 There is a need to further explore the outcomes of associative stigma, not just from the  
9 perspective of those experiencing this stigma (in this case mental health professionals) but the  
10 impact this stigma may have on their patients and potentially the wider community. Given that  
11 high associative stigma was associated with poorer job satisfaction, which has been shown to  
12 have poorer outcomes for patients [10], the implications of this finding are not only important to  
13 the well-being of staff but also patients. As stigma towards people with a mental illness,  
14 psychiatrists, and the mental health profession is highly interrelated, the ongoing process and  
15 difficult task of combating stigma related to mental illnesses continues. Associative stigma has  
16 received comparatively little attention from empirical researchers and continued efforts to address  
17 this under-studied yet important construct in conjunction with future efforts to dispel many of these  
18 misconceptions are needed.  
19  
20  
21  
22  
23  
24  
25  
26

27 **Word Count:** 5482  
28  
29

## 30 **DECLARATIONS**

31 **Ethics approval:** Ethical approval was obtained from the Domain Specific Review Board of the  
32 National Healthcare Group, Singapore prior to the launch of the survey.  
33  
34

35 **Patient consent:** Obtained

36 **Acknowledgement of funding:** This research was supported by the Singapore Ministry of  
37 Health's National Medical Research Council under the Centre Grant Programme (Grant No.:  
38 NMRC/CG/004/2013).  
39  
40

41 **Competing interest:** The authors declare they have no competing interests  
42

43 **Author contributions:** LP developed the study design, collected and verified the data and wrote  
44 the manuscript. SC assisted with the data collection and verification and provided intellectual  
45 inputs to the manuscript. EA and QY analyzed and interpreted the data and provided intellectual  
46 inputs to the manuscript. BYC assisted with the set-up and monitored the online survey and  
47 provided intellectual inputs to the manuscript. JAV provided intellectual inputs into the study  
48 design and interpretation of the findings. SO and KLY provided intellectual inputs into the study  
49 design and provided inputs to the manuscript. HCC provided clinical inputs into the findings and  
50 edited the manuscript. SAC and MS assisted in study design, interpreted the data, and provided  
51 intellectual inputs on the manuscript. All authors read and approved the final manuscript.  
52  
53  
54  
55  
56  
57

1  
2  
3 **Availability of data and materials:** Data is not available for online access, however readers who  
4 wish to gain access to the data can write to the senior author Dr Mythily Subramaniam at  
5 [mythily@imh.com.sg](mailto:mythily@imh.com.sg) with their requests. Access can be granted subject to the Institutional  
6 Review Board (IRB) and the research collaborative agreement guidelines. This is a requirement  
7 mandated for this research study by our IRB and funders.  
8  
9

10  
11 **Acknowledgement:** The authors would like to thank Dr Merav Ben Natan for sharing their  
12 associative stigma questionnaire.  
13  
14

15  
16  
17  
18  
19  
20  
21  
22  
23  
24  
25  
26  
27  
28  
29  
30  
31  
32  
33  
34  
35  
36  
37  
38  
39  
40  
41  
42  
43  
44  
45  
46  
47  
48  
49  
50  
51  
52  
53  
54  
55  
56  
57  
58  
59  
60

For peer review only



## REFERENCES

1. Link, B.G. and Phelan, J.C. (2001) Conceptualizing stigma. *Annual Review Sociology*, 27, 363-385
2. Corrigan PW, Kosyluk KA. Mental illness stigma: types, constructs, and vehicles for change. In: Corrigan PW, editor. *The stigma of disease and disability*. Washington, DC: American Psychological Association; 2014.
3. Goffman, E. *Stigma: Notes on the management of spoiled identity*. New York: Simon and Schuster. 1963
4. Glozier, N. Workplace Effects of the Stigmatization of Depression. *J. Occup. Env. Med.* 1998;40:793-800.
5. Corrigan PW and Watson AC. Understanding the impact of stigma on people with mental illness. *World Psychiatry*. 2002;1: 16–20.
6. Link, B. G., E. Struening, S. Neese-Todd, S. Asmussen, and J. C. Phelan. The Consequences of Stigma for the Self-Esteem of People with Mental Illnesses. *Psych Serv* 2001; 52:1621-26.
7. Markowitz FE. The Effects of Stigma on the Psychological Well-Being and Life Satisfaction of Persons with Mental Illness. *J. Health Soc. Behav* 1998;39:335-47.
8. Halter, M. J. Perceived characteristics of psychiatric nurses: Stigma by association. *Arch Psychiatr Nurs*, 2008; 22: 20-26.
9. Ross, CA., & Goldner, EM. Stigma, negative attitudes and discrimination towards mental illness within the nursing profession: A review of the literature. *Journal of Psychiatric and Mental Health Nursing*, 2009;16: 558-567.
10. Verhaeghe M and Bracke P. Associative Stigma among Mental Health Professionals: Implications for Professional and Service User Well-Being. *J. Health Soc. Behav* 2012; 53(1):17-32
11. Ben Natan M, Drori T and Hochman O. Associative Stigma related to Psychiatric Nursing within the Nursing Profession. *Arch Psych Nurs* 2015;29(6):388-392.
12. Vayshenker BA, DeLuca J, Bustle T, Yanos P. "As soon as people hear that word...": Associative stigma among clinicians working with people with serious mental illness, *Journal of Public Mental Health*, 2018;17(1):pp.20-28
13. Gouthro, T. J. Recognizing and addressing the stigma associated with mental health nursing: A critical perspective. *Issues Ment. Health Nurs*, 2009;30(11),669-676
14. Delaney KR. Psychiatric Mental Health Nurses: Stigma Issues We Fail to See. *Arch Psych Nurs*, 2012; 26: 333–335
15. Yanos, P. T., Vayshenker, B., Deluca, J., & O'Connor, L. K. Development and validation of a scale of mental health clinicians' experiences of associative stigma. *Psychiatric Services*, 2017;68, 1053-1060.
16. Lin, X., Rosenheck, R., Sun., B., Xie., G., Zhong., G., Tan., C., Li., Z., Yu., M., & He., H. Associative stigma experienced by mental health professionals in China and the United States. *Social Psychiatry and Psychiatric Epidemiology*. 2018; 1-9 <https://doi.org/10.1007/s00127-018-1643-6>
17. Pharris A, Hoa NP, Tishelman C, Marrone G, Kim Chuc NT, Brugha R, Thorson A. Community patterns of stigma towards persons living with HIV: a population-based latent class analysis from rural Vietnam. *BMC Public Health*. 2011 Sep 18;11:705.
18. Nylund KL, Asparouhov T, Muthen BO. Deciding on the number of classes in latent class analysis and growth mixture modeling: A Monte Carlo simulation study. *Structural equation modeling* 2007;14: 535–69
19. Hadzi-Pavlovic D (2009) Finding patterns and groupings: I. Introduction to latent class analysis. *Acta Neuropsychiatrica* 21: 312–13.



20. Collins LM, Lanza ST: Latent class and latent transition analysis with applications in the social, behavioral, and health sciences. Hoboken, New Jersey: John Wiley & Sons, Inc; 2010.
21. Sartorius N, Gaebel W, Cleveland H, Stuart H, Akiyama T et al. WPA guidance on how to combat stigmatization of psychiatry and psychiatrists. *World Psychiatry* 2010;9:131-144
22. Moller-Leimkuhler AM, Möller HJ, Maier W, Gaebel W, Falkai P. EPA guidance on improving the image of psychiatry. *Eur Arch Psychiatry Clin Neurosci* 2016; 266:139–154
23. Sood M and Chadda RK. Women in psychiatry: A view from the Indian subcontinent. *Indian J Psychiatry*. 2009; 51(3): 199–201
24. Zieger A, Mungee A, Schomerus G, Ta TM, Weyers A, Böge K et al. Attitude toward psychiatrists and psychiatric medication: A survey from five metropolitan cities in India. *Indian J Psychiatry* 2017;59:341-6.
25. Thara R & Srinivasan TN. How stigmatizing is schizophrenia in India? *Int J Soc Psychiatry* 2000; 46: 135-41
26. Subramaniam M, Abidin E, Picco L, Pang S, Shafie S, Vaingankar JA, Kwok KW, Verma K and Chong SA. Stigma towards people with mental disorders and its components – a perspective from multi-ethnic Singapore. *Epidemiology and Psychiatric Sciences*, 2106; 28:1-12.
27. Griffiths KM, Christensen H, Jorm AF. Predictors of depression stigma. *BMC Psychiatry* 2008; 8:25.
28. Corrigan PW, Watson AC. The stigma of psychiatric disorders and the gender, ethnicity, and education of the perceiver. *Community Ment Health J* 2007;43, 439–458.
29. Alexander LA and Link BG. The impact of contact on stigmatizing attitudes toward people with mental illness. *Journal of Mental Health*, 2003;12, 271–289.
30. Halter, M. J. Stigma in psychiatric nursing. *Perspectives in Psychiatric Care*, 2002;38, 23-29.
31. Catthoor K, Hutsebaut J, Schrijvers D, De Hert M, Peuskens J, Sabbe B. Preliminary study of associative stigma among trainee psychiatrists in Flanders, Belgium. *World J Psychiatry* 2014;4:62–68
32. Gaebel W, Zasko H, Zielasek J, Cleveland H, Samjeske K et al. Stigmatization of psychiatrists and general practitioners: results of an international survey. *Eur Arch Psychiatry Clin Neurosci* 2015; 265:189–197
33. Gaebel W, Zäske H, Cleveland HR, Zielasek J, Stuart H, Arboleda-Florez J et al., Measuring the stigma of psychiatry and psychiatrists: Development of a questionnaire. *European Archives of Psychiatry and Clinical Neuroscience*, 2011; 261(2), 119-123.
34. Compton MT, Frank E, Elon L et al. Changes in U.S. medical students' specialty interests over the course of medical school. *J Gen Intern Med* 2008;23:1095-100.
35. Gat I, Abramowitz MZ, Bentov-Gofrit D et al. Changes in the attitudes of Israeli students at the Hebrew University Medical School toward residency in psychiatry: a cohort study. *Isr J Psychiatry Relat Sci* 2007;44:194-203.
36. Laugharne R, Appiah-Poku J, Laugharne J et al. Attitudes toward psychiatry among final-year medical students in Kumasi, Ghana. *Acad Psychiatry* 2009;33:71-5.
37. Malhi GS, Parker GB, Parker K et al. Shrinking away from psychiatry? A survey of Australian medical students' interest in psychiatry. *Aust N Zeal J Psychiatry* 2002;36:416-23.
38. Pailhez G, Bulbena A, Coll J et al. Attitudes and views on psychiatry: a comparison between Spanish and U.S. medical students. *Acad Psychiatry* 2005;29:82-91.
39. Ong HL, Seow E, Chua BY, Xie H, Wang J, Lau YW, Chong SA, Subramaniam M. Why is psychiatric nursing not the preferred option for nursing students: A cross-sectional study examining pre-nursing and nursing school factors *Nurse Education Today* 52 (2017) 95–102

- 1
- 2
- 3
- 4 40. Lambert TW, Turner G, Fazel S et al. Reasons why some UK medical graduates who
- 5 initially choose psychiatry do not pursue it as a long-term career. *Psychol Med* 2006;36:679-
- 6 84.
- 7 41. Malhi, G. S., Parker, G. B., Carr, V. J., Kirkby, K. C., Yellowlees, P., Boyce, P., et al.
- 8 Attitudes toward psychiatry among students entering medical school. *Acta Psychiatrica*
- 9 *Scandinavica*, 2003;107, 424–429.
- 10 42. Tay LH, Ang E and Hegney D. Nurses' perceptions of the barriers to effective
- 11 communication with inpatient cancer adults in Singapore. *J of Clin Nurs* 2012; 21:2647-58
- 12
- 13
- 14
- 15
- 16
- 17
- 18
- 19
- 20
- 21
- 22
- 23
- 24
- 25
- 26
- 27
- 28
- 29
- 30
- 31
- 32
- 33
- 34
- 35
- 36
- 37
- 38
- 39
- 40
- 41
- 42
- 43
- 44
- 45
- 46
- 47
- 48
- 49
- 50
- 51
- 52
- 53
- 54
- 55
- 56
- 57
- 58
- 59
- 60

For peer review only

**Table 1: Characteristics of the study sample**

| <b>Characteristics</b>                        | <b>n</b> | <b>%</b> |
|-----------------------------------------------|----------|----------|
| Age (mean years, SD)                          | 36.4     | 10.6     |
| Minimum to Maximum                            | 21 to    | 71       |
| Gender                                        |          |          |
| Female                                        | 291      | 63.0     |
| Male                                          | 171      | 37.0     |
| Ethnicity                                     |          |          |
| Chinese                                       | 278      | 60.2     |
| Malay                                         | 36       | 7.8      |
| Indian                                        | 64       | 13.8     |
| Filipino                                      | 59       | 12.8     |
| Myanmar                                       | 16       | 3.5      |
| Others                                        | 9        | 1.9      |
| Marital status                                |          |          |
| Never married                                 | 205      | 44.4     |
| Ever married                                  | 257      | 55.6     |
| Education level                               |          |          |
| Secondary/ ITE/'O' level                      | 18       | 3.9      |
| 'A' level/diploma                             | 49       | 10.6     |
| Bachelor                                      | 241      | 52.2     |
| Master or above                               | 154      | 33.3     |
| Residential status                            |          |          |
| Singapore Citizen                             | 320      | 69.2     |
| Permanent Resident                            | 59       | 12.8     |
| Non Resident                                  | 83       | 18.0     |
| Occupation                                    |          |          |
| Doctor                                        | 58       | 12.6     |
| Nurse                                         | 201      | 43.5     |
| Allied Health                                 | 203      | 43.9     |
| Years worked at Institute<br>Of Mental Health |          |          |
| Less than 1 year                              | 52       | 11.3     |
| 1-5 years                                     | 195      | 42.2     |
| 6-10 years                                    | 103      | 22.3     |
| More than 10 years                            | 112      | 24.2     |
| <b>Job satisfaction</b> (mean years, SD)      | 7.2      | 1.6      |
| Minimum to Maximum                            | 1 to     | 10       |

**SD= standard deviation**

**Table 2: Model comparisons and fit indices**

| Classes | AIC    | BIC           | CAIC    | ABIC   | Entropy |
|---------|--------|---------------|---------|--------|---------|
| 2       | 711.02 | 806.14        | 829.14  | 733.14 | 0.77    |
| 3       | 617.74 | <b>762.48</b> | 797.48  | 651.40 | 0.80    |
| 4       | 575.42 | 769.79        | 816.79  | 620.63 | 0.78    |
| 5       | 571.02 | 815.02        | 874.02  | 627.77 | 0.79    |
| 6       | 589.06 | 882.69        | 953.69  | 657.35 | 0.68    |
| 7       | 549.33 | 892.58        | 975.58  | 629.16 | 0.78    |
| 8       | 550.76 | 943.64        | 1038.64 | 642.13 | 0.80    |
| 9       | 567.26 | 1009.77       | 1116.77 | 670.18 | 0.80    |

Note: Akaike information criterion (AIC), Bayesian information criterion (BIC), consistent AIC (CAIC), adjusted BIC (ABIC) and entropy all measure model fit. These model comparison measurements were used for choosing the optimal number of classes in latent class analysis, where the models with the smallest values indicate a better fit.

**Table 3: Three latent class model of associative stigma prevalence and item-response probabilities**

| Item | Statement                                                                                                               | Endorsement rate** (n=462) | Latent class (Model 2)       |                | Latent class (Model 3) |               |              |
|------|-------------------------------------------------------------------------------------------------------------------------|----------------------------|------------------------------|----------------|------------------------|---------------|--------------|
|      |                                                                                                                         |                            | CLASS 1                      | CLASS 2        | CLASS 1                | CLASS 2       | CLASS 3      |
|      |                                                                                                                         |                            |                              |                | No/low Prevalence      | Moderate      | High         |
|      |                                                                                                                         |                            | 41.34% (n=191)               | 58.86% (n=271) | 48.7% (n=225)          | 40.5% (n=187) | 10.8% (n=50) |
|      |                                                                                                                         |                            | Item response probabilities* |                |                        |               |              |
| 1    | People react negatively when they know I work in a mental health care setting                                           | 60.61                      | 0.24                         | 0.51           | 0.46                   | 0.70          | 0.91         |
| 2    | People make jokes about me for working in a mental health care setting                                                  | 63.85                      | 0.27                         | 0.43           | 0.56                   | 0.65          | 0.91         |
| 3    | I feel ashamed to be working in a mental health care setting                                                            | 4.76                       | 0.89                         | 1.00           | 0.00                   | 0.00          | 0.39         |
| 4    | I am reluctant to tell people I work in a mental health care setting                                                    | 14.50                      | 0.79                         | 0.91           | 0.10                   | 0.09          | 0.49         |
| 5    | I have been treated unfairly by others when they learn I work in a mental health care setting                           | 12.99                      | 0.71                         | 0.98           | 0.04                   | 0.13          | 0.50         |
| 6    | Most people think less of a person who works in a mental health care setting                                            | 28.14                      | 0.97                         | 0.17           | 0.04                   | 0.86          | 0.77         |
| 7    | Once they know a person works in a mental health care setting, most people will take their opinions less seriously      | 20.13                      | 0.87                         | 0.04           | 0.00                   | 0.65          | 0.81         |
| 8    | Mental health care contributes to the health of people, families, communities and society in unique and meaningful ways | 91.99                      | 0.95                         | 0.96           | 0.08                   | 0.15          | 0.60         |
| 9    | The mental health profession lacks a scientific basis                                                                   | 14.94                      | 0.48                         | 0.18           | 0.16                   | 0.27          | 0.79         |

|    |                                                                         |       |      |      |      |      |      |
|----|-------------------------------------------------------------------------|-------|------|------|------|------|------|
| 10 | Working in a mental health care setting does not require special skills | 2.81  | 0.13 | 0.03 | 0.02 | 0.02 | 0.36 |
| 11 | Mental health work is dangerous                                         | 40.69 | 0.79 | 0.50 | 0.45 | 0.59 | 0.66 |

\*Item response probability values range from 0 to 1, where numbers closer to 0 represent a low probability of endorsing a specific item, whereas values closer to 1 represent a high probability of endorsing the item. \*\*Endorsement rate was determined if respondents provided the following responses: sometimes, often, all the time, slightly agree or strongly agree.

For peer review only

**Table 4: Socio-demographic and employment related correlates of associative stigma among mental health professionals versus the reference group**

|                      |                                     | Moderate Associative Stigma |             |             |              | High Associative Stigma |             |              |              |
|----------------------|-------------------------------------|-----------------------------|-------------|-------------|--------------|-------------------------|-------------|--------------|--------------|
|                      |                                     | Odds Ratio                  | 95% CI      |             | p value      | Odds Ratio              | 95% CI      |              | p value      |
|                      |                                     |                             | Lower       | Upper       |              |                         | Lower       | Upper        |              |
| Age                  |                                     | 0.98                        | 0.95        | 1.00        | 0.092        | 0.98                    | 0.94        | 1.02         | 0.345        |
| Sex                  | Female                              | Ref                         |             |             |              |                         |             |              |              |
|                      | Male                                | 1.23                        | 0.78        | 1.94        | 0.369        | 1.18                    | 0.57        | 2.43         | 0.655        |
| Residency status     | Singapore Citizen                   | Ref                         |             |             |              |                         |             |              |              |
|                      | Permanent Resident                  | 1.34                        | 0.64        | 2.82        | 0.443        | 0.72                    | 0.21        | 2.48         | 0.607        |
|                      | Non Resident                        | 1.12                        | 0.47        | 2.65        | 0.801        | 0.36                    | 0.08        | 1.66         | 0.189        |
| Ethnicity            | Chinese                             | Ref                         |             |             |              |                         |             |              |              |
|                      | Malay                               | 0.59                        | 0.22        | 1.55        | 0.282        | 0.97                    | 0.29        | 3.26         | 0.965        |
|                      | Indian                              | 1.61                        | 0.80        | 3.27        | 0.186        | <b>2.97</b>             | <b>1.04</b> | <b>8.53</b>  | <b>0.043</b> |
|                      | Filipino                            | 0.88                        | 0.31        | 2.45        | 0.802        | 3.00                    | 0.63        | 14.38        | 0.170        |
|                      | Myanmar                             | 1.69                        | 0.43        | 6.62        | 0.450        | 0.92                    | 0.07        | 11.56        | 0.947        |
|                      | Others                              | 1.13                        | 0.25        | 5.19        | 0.874        | .                       | .           | .            | .            |
| Marital status       | Never married                       | Ref                         |             |             |              |                         |             |              |              |
|                      | Ever married                        | 1.13                        | 0.70        | 1.83        | 0.625        | 1.06                    | 0.48        | 2.37         | 0.885        |
| Education            | Secondary/ 'O/N' level <sup>a</sup> | 3.06                        | 0.77        | 12.10       | 0.111        | <b>6.18</b>             | <b>1.07</b> | <b>35.89</b> | <b>0.042</b> |
|                      | 'A' level <sup>b</sup> & diploma    | 1.61                        | 0.62        | 4.21        | 0.333        | 2.50                    | 0.61        | 10.28        | 0.203        |
|                      | Bachelor                            | 1.22                        | 0.71        | 2.11        | 0.470        | 1.28                    | 0.44        | 3.74         | 0.656        |
|                      | Masters or above                    | Ref                         |             |             |              |                         |             |              |              |
| Occupation           | Doctor                              | <b>2.74</b>                 | <b>1.31</b> | <b>5.71</b> | <b>0.007</b> | 2.22                    | 0.46        | 10.84        | 0.324        |
|                      | Nurse                               | <b>2.44</b>                 | <b>1.29</b> | <b>4.64</b> | <b>0.006</b> | <b>6.62</b>             | <b>2.23</b> | <b>19.63</b> | <b>0.001</b> |
|                      | Allied Health                       | Ref                         |             |             |              |                         |             |              |              |
| Years worked at IMH* | <1 year                             | <b>0.36</b>                 | <b>0.13</b> | <b>0.95</b> | <b>0.040</b> | 0.23                    | 0.03        | 1.71         | 0.151        |
|                      | 1-5 years                           | 0.53                        | 0.25        | 1.09        | 0.083        | 0.98                    | 0.28        | 3.39         | 0.977        |
|                      | 6-10 years                          | <b>0.45</b>                 | <b>0.22</b> | <b>0.92</b> | <b>0.029</b> | 0.79                    | 0.24        | 2.55         | 0.689        |
|                      | >10 years                           | Ref                         |             |             |              |                         |             |              |              |

Ref= reference group CI= confidence interval

\*Institute of Mental Health

a= 'O' and 'N' levels indicate 10 and 11 years of education, respectively b= 'A' level indicates 12 years of education.

**Table 5: Relationship between associative stigma and job satisfaction**

| Latent classes              | n   | Mean | SD   | Model 1          |        |       | Model 2                   |        |       |         |                  |
|-----------------------------|-----|------|------|------------------|--------|-------|---------------------------|--------|-------|---------|------------------|
|                             |     |      |      | Beta coefficient | 95% CI |       | Adjusted Beta coefficient | 95% CI |       | p value |                  |
|                             |     |      |      |                  | Lower  | Upper |                           | Lower  | Upper |         |                  |
| No/low associative stigma   | 225 | 7.24 | 1.52 | Ref.             |        |       | Ref.                      |        |       |         |                  |
| Moderate associative stigma | 187 | 7.26 | 1.51 | 0.02             | -0.28  | 0.32  | 0.9132                    | -0.18  | -0.49 | 0.12    | 0.2337           |
| High associative stigma     | 50  | 6.46 | 1.79 | -0.78            | -1.26  | -0.30 | <b>0.0013</b>             | -1.08  | -1.57 | -0.59   | <b>&lt;.0001</b> |

Ref= Reference group CI= confidence interval SD= standard deviation

Note: Job satisfaction scores were based on a single item (how satisfied are you with your job?) using a scale from 1 to 10, where 1 indicates very dissatisfied and 10 indicate very satisfied.

Model 1 = Simple linear regression

Model 2 = Multiple linear regression after adjusting for socio-demographic and employment related correlates including age, gender, ethnicity, residency status, marital status, education, occupation and years worked at Institute of Mental Health



1  
2  
3  
4  
5  
6  
7  
8  
9  
10  
11  
12  
13  
14  
15  
16  
17  
18  
19  
20  
21  
22  
23  
24  
25  
26  
27  
28  
29  
30  
31  
32  
33  
34  
35  
36  
37  
38  
39  
40  
41  
42  
43  
44  
45  
46  
47  
48  
49  
50  
51  
52  
53  
54  
55  
56  
57  
58  
59  
60

For peer review only

**Figure 1: 3-class unconditional latent class analysis of associative stigma**

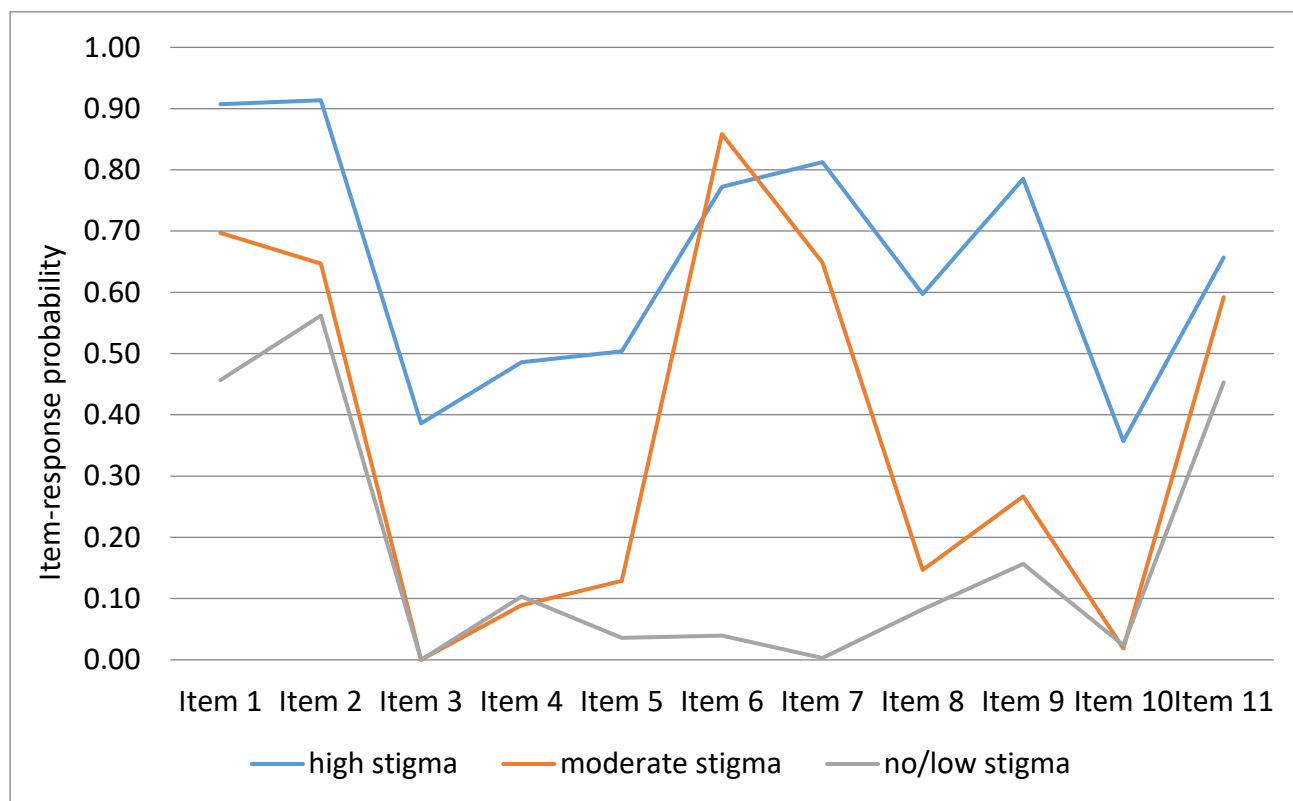

review only

**STROBE 2007 (v4) Statement—Checklist of items that should be included in reports of *cross-sectional studies***

| Section/Topic                | Item # | Recommendation                                                                                                                                                                       | Reported on page # |
|------------------------------|--------|--------------------------------------------------------------------------------------------------------------------------------------------------------------------------------------|--------------------|
| <b>Title and abstract</b>    | 1      | (a) Indicate the study's design with a commonly used term in the title or the abstract                                                                                               | 1                  |
|                              |        | (b) Provide in the abstract an informative and balanced summary of what was done and what was found                                                                                  | 2                  |
| <b>Introduction</b>          |        |                                                                                                                                                                                      |                    |
| Background/rationale         | 2      | Explain the scientific background and rationale for the investigation being reported                                                                                                 | 3                  |
| Objectives                   | 3      | State specific objectives, including any prespecified hypotheses                                                                                                                     | 4                  |
| <b>Methods</b>               |        |                                                                                                                                                                                      |                    |
| Study design                 | 4      | Present key elements of study design early in the paper                                                                                                                              | 5                  |
| Setting                      | 5      | Describe the setting, locations, and relevant dates, including periods of recruitment, exposure, follow-up, and data collection                                                      | 5                  |
| Participants                 | 6      | (a) Give the eligibility criteria, and the sources and methods of selection of participants                                                                                          | 5                  |
| Variables                    | 7      | Clearly define all outcomes, exposures, predictors, potential confounders, and effect modifiers. Give diagnostic criteria, if applicable                                             | 6                  |
| Data sources/<br>measurement | 8*     | For each variable of interest, give sources of data and details of methods of assessment (measurement). Describe comparability of assessment methods if there is more than one group | 6                  |
| Bias                         | 9      | Describe any efforts to address potential sources of bias                                                                                                                            |                    |
| Study size                   | 10     | Explain how the study size was arrived at                                                                                                                                            | 5                  |
| Quantitative variables       | 11     | Explain how quantitative variables were handled in the analyses. If applicable, describe which groupings were chosen and why                                                         | 7                  |
| Statistical methods          | 12     | (a) Describe all statistical methods, including those used to control for confounding                                                                                                | 7                  |
|                              |        | (b) Describe any methods used to examine subgroups and interactions                                                                                                                  |                    |
|                              |        | (c) Explain how missing data were addressed                                                                                                                                          |                    |
|                              |        | (d) If applicable, describe analytical methods taking account of sampling strategy                                                                                                   |                    |
|                              |        | (e) Describe any sensitivity analyses                                                                                                                                                |                    |
| <b>Results</b>               |        |                                                                                                                                                                                      |                    |

|                          |     |                                                                                                                                                                                                                                                                                                                                                                                                               |       |
|--------------------------|-----|---------------------------------------------------------------------------------------------------------------------------------------------------------------------------------------------------------------------------------------------------------------------------------------------------------------------------------------------------------------------------------------------------------------|-------|
| Participants             | 13* | (a) Report numbers of individuals at each stage of study—eg numbers potentially eligible, examined for eligibility, confirmed eligible, included in the study, completing follow-up, and analysed<br>(b) Give reasons for non-participation at each stage<br>(c) Consider use of a flow diagram                                                                                                               | 7-8   |
| Descriptive data         | 14* | (a) Give characteristics of study participants (eg demographic, clinical, social) and information on exposures and potential confounders<br>(b) Indicate number of participants with missing data for each variable of interest                                                                                                                                                                               | 7-8   |
| Outcome data             | 15* | Report numbers of outcome events or summary measures                                                                                                                                                                                                                                                                                                                                                          |       |
| Main results             | 16  | (a) Give unadjusted estimates and, if applicable, confounder-adjusted estimates and their precision (eg, 95% confidence interval). Make clear which confounders were adjusted for and why they were included<br>(b) Report category boundaries when continuous variables were categorized<br>(c) If relevant, consider translating estimates of relative risk into absolute risk for a meaningful time period | 8-9   |
| Other analyses           | 17  | Report other analyses done—eg analyses of subgroups and interactions, and sensitivity analyses                                                                                                                                                                                                                                                                                                                | 8-9   |
| <b>Discussion</b>        |     |                                                                                                                                                                                                                                                                                                                                                                                                               |       |
| Key results              | 18  | Summarise key results with reference to study objectives                                                                                                                                                                                                                                                                                                                                                      | 9-12  |
| Limitations              | 19  | Discuss limitations of the study, taking into account sources of potential bias or imprecision. Discuss both direction and magnitude of any potential bias                                                                                                                                                                                                                                                    | 13-14 |
| Interpretation           | 20  | Give a cautious overall interpretation of results considering objectives, limitations, multiplicity of analyses, results from similar studies, and other relevant evidence                                                                                                                                                                                                                                    | 14-15 |
| Generalisability         | 21  | Discuss the generalisability (external validity) of the study results                                                                                                                                                                                                                                                                                                                                         | 14    |
| <b>Other information</b> |     |                                                                                                                                                                                                                                                                                                                                                                                                               |       |
| Funding                  | 22  | Give the source of funding and the role of the funders for the present study and, if applicable, for the original study on which the present article is based                                                                                                                                                                                                                                                 | 15    |

\*Give information separately for cases and controls in case-control studies and, if applicable, for exposed and unexposed groups in cohort and cross-sectional studies.

**Note:** An Explanation and Elaboration article discusses each checklist item and gives methodological background and published examples of transparent reporting. The STROBE checklist is best used in conjunction with this article (freely available on the Web sites of PLoS Medicine at <http://www.plosmedicine.org/>, Annals of Internal Medicine at <http://www.annals.org/>, and Epidemiology at <http://www.epidem.com/>). Information on the STROBE Initiative is available at [www.strobe-statement.org](http://www.strobe-statement.org).

# BMJ Open

## Associative stigma among mental health professionals in Singapore: a cross-sectional study

|                                 |                                                                                                                                                                                                                                                                                                                                                                                                                                                                                                                                                                                                                                                                                                                                            |
|---------------------------------|--------------------------------------------------------------------------------------------------------------------------------------------------------------------------------------------------------------------------------------------------------------------------------------------------------------------------------------------------------------------------------------------------------------------------------------------------------------------------------------------------------------------------------------------------------------------------------------------------------------------------------------------------------------------------------------------------------------------------------------------|
| Journal:                        | <i>BMJ Open</i>                                                                                                                                                                                                                                                                                                                                                                                                                                                                                                                                                                                                                                                                                                                            |
| Manuscript ID                   | bmjopen-2018-028179.R2                                                                                                                                                                                                                                                                                                                                                                                                                                                                                                                                                                                                                                                                                                                     |
| Article Type:                   | Research                                                                                                                                                                                                                                                                                                                                                                                                                                                                                                                                                                                                                                                                                                                                   |
| Date Submitted by the Author:   | 13-Jun-2019                                                                                                                                                                                                                                                                                                                                                                                                                                                                                                                                                                                                                                                                                                                                |
| Complete List of Authors:       | Picco, Louisa; Institute of Mental Health, Research Division<br>Chang, Sherilyn; Institute of Mental Health, Research Division<br>Abdin , Edimansyah ; Institute of Mental Health, Research Division<br>Chua, Boon Yiang; Institute of Mental Health, Research Division<br>Yuan, Qi; Institute of Mental Health, Research Division<br>Vaingankar, Janhavi; Institute of Mental Health, Singapore, Research<br>Ong, Samantha ; Institute of Mental Health, Nursing<br>Yow, Kah Lai; Institute of Mental Health, Allied Health<br>Chua, Hong Choon; Institute of Mental Health, Chief Executive Office<br>Chong, Siow Ann ; Institute of Mental Health, Research Division<br>Subramaniam, M; Institute of Mental Health, Singapore, Research |
| <b>Primary Subject Heading</b>: | Mental health                                                                                                                                                                                                                                                                                                                                                                                                                                                                                                                                                                                                                                                                                                                              |
| Secondary Subject Heading:      | Health services research, Public health                                                                                                                                                                                                                                                                                                                                                                                                                                                                                                                                                                                                                                                                                                    |
| Keywords:                       | MENTAL HEALTH, PSYCHIATRY, PRIMARY CARE                                                                                                                                                                                                                                                                                                                                                                                                                                                                                                                                                                                                                                                                                                    |
|                                 |                                                                                                                                                                                                                                                                                                                                                                                                                                                                                                                                                                                                                                                                                                                                            |

SCHOLARONE™  
Manuscripts

1  
2  
3 **Title: Associative stigma among mental health professionals in Singapore: a cross-**  
4 **sectional study**  
5  
6  
7

8 **Authors:**

9 Louisa Picco\*, [louisa.picco@gmail.com](mailto:louisa.picco@gmail.com)

10 Sherilyn Chang\*, [Sherilyn\\_Sh\\_CHANG@imh.com.sg](mailto:Sherilyn_Sh_CHANG@imh.com.sg)

11 Edimansyah Abdin\*, [edimansyah\\_abdin@imh.com.sg](mailto:edimansyah_abdin@imh.com.sg)

12 Boon Yiang Chua\*, [boon\\_yiang\\_chua@imh.com.sg](mailto:boon_yiang_chua@imh.com.sg)

13 Qi Yuan\*, [Qi\\_YUAN@imh.com.sg](mailto:Qi_YUAN@imh.com.sg)

14 Janhavi Ajit Vaingankar\*, [janhavi\\_vaingankar@imh.com.sg](mailto:janhavi_vaingankar@imh.com.sg)

15 Samantha Ong<sup>a</sup>, [samantha\\_ong@imh.com.sg](mailto:samantha_ong@imh.com.sg)

16 Kah Lai Yow<sup>b</sup>, [kah\\_lai\\_yow@imh.com.sg](mailto:kah_lai_yow@imh.com.sg)

17 Hong Choon Chua<sup>c</sup>, [Hong\\_Choon\\_Chua@imh.com.sg](mailto:Hong_Choon_Chua@imh.com.sg)

18 Siow Ann Chong\*, [siow\\_ann\\_chong@imh.com.sg](mailto:siow_ann_chong@imh.com.sg)

19 Mythily Subramaniam\*, [mythily@imh.com.sg](mailto:mythily@imh.com.sg)

20  
21  
22  
23  
24  
25  
26  
27  
28 \* Research Division, Institute of Mental Health, Singapore

29  
30 <sup>a</sup> Nursing Administration, Institute of Mental Health, Singapore

31  
32 <sup>b</sup> Clinical and Allied Health Professionals Services, Institute of Mental Health, Singapore

33  
34 <sup>c</sup> Chief Executive Office, Institute of Mental Health, Singapore  
35  
36

37 **Corresponding author:**

38 Louisa Picco

39 Manager, Research Division

40 Institute of Mental Health

41 Buangkok Green Medical Park

42 10 Buangkok View

43 Singapore 539747

44 Email: [louisa.picco@gmail.com](mailto:louisa.picco@gmail.com)  
45  
46  
47  
48  
49  
50  
51  
52  
53  
54  
55  
56  
57  
58  
59  
60

## ABSTRACT

**Objectives:** (i) Investigate and explore whether different classes of associative stigma (the process by which a person experiences stigmatization as a result of an association with another stigmatized person) could be identified using latent class analysis; (ii) Determine the socio-demographic and employment related correlates of associative stigma; and (iii) Examine the relationship between associative stigma and job satisfaction, among mental health professionals.

**Design:** Cross-sectional online survey

**Participants:** Doctors, nurses and allied health staff, working in Singapore

**Methods:** Staff (n=462) completed an online survey which comprised 11 associative stigma items and also captured socio-demographic and job satisfaction related information. Latent class analysis was used to classify associative stigma upon patterns of observed categorical variables. Multinomial logistic regression was used to examine associations between socio-demographic and employment related factors and the different classes, while multiple linear regression analyses was used to examine the relationship between associative stigma and job satisfaction.

**Results:** The latent class analysis revealed that items formed a 3-class model where the classes were classified as 'no/low associative stigma', 'moderate associative stigma' and 'high associative stigma'. 48.7%, 40.5% and 10.8% of the population comprised no/low, moderate and high associative stigma classes, respectively. Multinomial logistic regression showed that years of service and occupation were significantly associated with moderate associative stigma, while factors associated with high associative stigma were education, ethnicity and occupation. Multiple linear regression analyses revealed that high associative stigma was significantly associated with lower job satisfaction scores.

**Conclusion:** Associative stigma was not uncommon among mental health professionals and was associated with various socio-demographic factors and poorer job satisfaction. Associative stigma has received comparatively little attention from empirical researchers and continued efforts to address this under-studied yet important construct in conjunction with future efforts to dispel misconceptions related to mental illnesses are needed.

**Key words:** associative stigma, latent class analysis, mental health, doctors, nurses, allied health staff

## ARTICLE SUMMARY

### Strengths and limitations of the study

- This is the first study to explore associative stigma among mental health professionals in Asia.
- Latent class analysis was used to classify associative stigma upon patterns of observed categorical variables.
- Multinomial logistic regression and multiple linear regression analyses were used to examine associations between socio-demographic factors and associative stigma and the relationship between associative stigma and job satisfaction.
- The study has some limitations including the cross-sectional design, it may be subjected to social desirability bias and it lacks generalisability due to inclusion criteria.

### INTRODUCTION

Stigma is a complex and multi-faceted construct and often results from misunderstandings and perceptions society has about people with mental illnesses. Link and Phelan describe stigma as an overarching construct that exists when five interrelated components occur: (1) labelling, (2) negative attributes, (3) separation (4) status loss and (5) discrimination [1]. People with mental illnesses are frequently viewed or labeled as incompetent, irresponsible, unpredictable, and dangerous [2]. The consequences of this prejudice and discrimination can result in people with mental illnesses avoiding care and treatment, preferring denial or choosing not to disclose their condition [3]. This can then have damaging effects to other aspects of their lives including employment and job opportunities, relationships, housing opportunities, life satisfaction as well as self-esteem and self-efficacy [4-7]. The impact of stigma is significant not only for people with mental illnesses, but also their families, caregivers, and even health professionals providing mental health care.

To date there has been extensive literature surrounding stigma towards those with a mental illness however stigma does not only affect those who are being stigmatized but can also emanate from close association to these people. Associative stigma otherwise referred to as affiliate stigma, courtesy stigma or secondary stigma describes the process by which a person experiences stigmatization as a result of an association with another stigmatized person [3,8]. This stigma by association may be experienced by parents, spouses, siblings, children, friends, caregivers or co-workers of the stigmatized. More recently, there has been a growing interest in associative stigma experienced by mental health professionals, whereby they or the psychiatric



1  
2  
3 discipline is judged along the same stigmatizing stereotypes as their patients [9]. Negative and  
4 stigmatizing beliefs relating to mental health professionals not only discredit the valuable  
5 contributions these individuals make, but more importantly, these beliefs discredit the needs of  
6 people who access mental healthcare. Furthermore, negative perceptions of mental health  
7 professionals may in fact further exacerbate the stigma of mental illnesses [8].  
8  
9  
10

11  
12 There is a dearth of literature concerning associative stigma experienced by mental health care  
13 professionals. **Verhaeghe and Bracke [10]** investigated the link between associative stigma and  
14 burnout and job satisfaction among mental health professionals in Belgium, and found that  
15 associative stigma was related to more depersonalization, more emotional exhaustion, and less  
16 job satisfaction. In a second study, **Ben Natan et al., [11]** compared attitudes and stigma among  
17 psychiatric and non-psychiatric nurses in Israel and found that non-psychiatric nurses held more  
18 stigmatizing views towards mental illnesses, individuals with a mental illness and the role of  
19 psychiatric nursing, although associative stigma did not differ between the two groups. A recent  
20 qualitative study among mental health clinicians from varying professional backgrounds including  
21 allied health staff, psychiatrists and law enforcement, found that these professionals commonly  
22 endorsed experiences of associative stigma from community members [12].  
23  
24  
25  
26  
27  
28  
29  
30

31  
32 There have also been a few earlier studies which have explored associative stigma among nurses  
33 [8,13, 14], whilst to our knowledge, besides the qualitative study described above, there has only  
34 been one other study that included allied health staff working in mental health care [10], and none  
35 of which have been undertaken in Asian settings. Less is therefore known about the extent of  
36 associative stigma amongst health professionals working in Asia and how this may compare to  
37 Western cultures. Despite the lack of research in this field, numerous studies have explored  
38 perceptions, attitudes and stigma towards psychiatry and psychiatrists among medical students  
39 in various parts of the world [15]. It is therefore possible that these negative perceptions are a  
40 result of public stigma, media portrayal of psychiatry and people with mental illness or even  
41 influences by medical teaching staff and such perceptions may contribute to associative stigma  
42 among mental health professionals.  
43  
44  
45  
46  
47  
48  
49

50  
51 At the time this study was conducted, there was no developed or validated tool to specifically  
52 measure associative stigma among mental health professionals and accordingly comparisons  
53 across studies are difficult. A recent study however has explored the validity and factor structure  
54 of associative stigma via the Clinician Associative Stigma Scale (CASS) [16]. Findings revealed  
55  
56  
57

1  
2  
3 that amongst a sample of clinicians in the US, the CASS displayed good internal consistency and  
4 evidence of convergent validity and is an effective tool for measuring associative stigma among  
5 mental health professionals who work with people with serious mental illness. A second study,  
6 has also validated this scale amongst a sample of clinicians in China, with results revealing how  
7 cultural differences can impact associative stigma **[17]**.  
8  
9  
10

11  
12 The current study investigated associative stigma experienced by staff working at the Institute of  
13 Mental Health (IMH). IMH is the only tertiary psychiatric hospital in Singapore and encompasses  
14 a 2000 bed in-patient facility as well as specialist outpatient clinics and employs over 1500  
15 doctors, nurses and allied health staff including psychologists, pharmacists, occupational  
16 therapists, physiotherapists, case managers and medical social workers. The aims of this study  
17 were to: (i) investigate and explore whether different classes of associative stigma could be  
18 identified using latent class analysis; (ii) determine the socio-demographic and employment  
19 related correlates of associative stigma; and (iii) examine the relationship between associative  
20 stigma and job satisfaction, among mental health professionals (doctors, nurses, psychologists,  
21 pharmacists, occupational therapists, physiotherapists, case managers, counselors and medical  
22 social workers) working at IMH.  
23  
24  
25  
26  
27  
28  
29  
30

31 In order to explore associative stigma in the current study, latent class analysis was used.  
32 Previous research has mainly been conducted to develop and validate stigma scales that  
33 measure stigma towards those with a mental illness. However, much of this research has  
34 validated these scales using a variable-centered approach, such as exploratory and confirmatory  
35 factor analysis. Such methods measure stigma as a total community or population score and this  
36 mean score may not give the full picture of the complex phenomena of stigma, which is often  
37 multi-faceted within individuals and populations **[18]**.  
38  
39  
40  
41  
42  
43

44 An alternative approach that can enhance understanding of the varying characteristics and levels  
45 of stigma within a population is latent class analysis. Latent class analysis is a respondent-  
46 centered approach that aims to group individuals into class groups based on their responses to a  
47 set of observed variables. It has been widely used in behavioural and social science research to  
48 uncover unobserved heterogeneity in a population and to find substantively meaningful groups of  
49 people that are similar in their responses to measured variables or growth trajectories **[19]**. Once  
50 individuals are assigned to their most likely class, based on their responses to observed variables,  
51  
52  
53  
54  
55  
56  
57

1  
2  
3 it is then possible to examine other features such as socio-demographic correlates of each class,  
4 to determine predictors of these classes [20].  
5  
6  
7

## 8 **METHODS**

### 9 **Participants and procedure**

10 All doctors, nurses and allied health staff (psychologists, pharmacists, occupational therapists,  
11 physiotherapists, case managers and medical social workers) working at IMH were invited to  
12 participate in the survey, which was administered via Questionpro, an online survey application.  
13 Staff were informed of the study and the inclusion criteria via email and were sent a link to the  
14 online survey. Inclusion criteria required respondents to be: (i) Singapore citizens, permanent  
15 residents or foreigners with an employment or work permit; (ii) doctors, nurses, or allied health  
16 staff currently working at IMH and; (iii) aged 21 years and above. Staff who were willing to  
17 participate in the survey were required to read and accept an online consent form thus indicating  
18 their willingness and consent to participate in the study.  
19  
20  
21  
22  
23  
24  
25  
26

27 In order to explore employment related correlates such as occupation, it was estimated that a  
28 sample size of approximately 200 nurses and 200 allied health staff would be needed to explore  
29 differences in associative stigma amongst the two groups, where sample size calculations were  
30 performed using PS (power and sample size calculation) software for comparing means. Doctors  
31 were not included in the sample size calculation as at the time of the survey we knew that less  
32 than 100 doctors were currently employed at IMH and therefore a small number of doctors were  
33 expected to participate in the study. As reported in a previous study, Natan et al [11] found there  
34 to be significant mean difference in stigma scores between psychiatric and non psychiatric nurses,  
35 with psychiatric nurses having more positive attitudes towards mental illness (mean= 2.5; SD=  
36 0.76 versus mean = 2.25; SD= 0.71), individuals with mental illness (mean= 3.33; SD= 0.6) versus  
37 mean= 3.57; SD=0.7) and the role of psychiatric nursing (mean=1.79; SD=0.6 versus mean=2.5;  
38 SD=0.5). Assuming a significance level at p value less than 0.05 and 80% power of the study, the  
39 minimum sample size required to replicate these analysis is 146 subjects per group (i.e., Group  
40 1= nurses and Group 2= allied health (psychologists, pharmacists, occupational therapists,  
41 physiotherapists, case managers, counselors and medical social workers)). Taking into account  
42 a 40% rate of incomplete or partial completes a sample size of 200 per group (400 in total) was  
43 required. Accordingly, once this limit was reached, subsequent staff who wished to participate in  
44 the survey were sent a message informing them recruitment had ceased. Data were collected  
45 between February and April 2016, with a total of 470 participants completing the study; eight  
46  
47  
48  
49  
50  
51  
52  
53  
54  
55  
56  
57

1  
2  
3 cases were removed due to unreliable data or staff not meeting the inclusion criteria. Ethical  
4 approval was obtained from the Domain Specific Review Board of the National Healthcare Group,  
5 Singapore.  
6  
7

### 8 9 **Patient and public involvement**

10  
11 There was no patient or public involvement in the study design, however staff at IMH will be  
12 informed of the study findings.  
13  
14

### 15 16 **Measures**

17  
18 At the time this study was conducted, there was no developed and validated instrument which  
19 measured associative stigma. Two recent studies [10,11] derived items to measure associative  
20 stigma, based on their own literature reviews. Modified versions of some of these items were used  
21 and additional items were also added based on our own literature review. Five items were  
22 answered using a 5-point Likert scale (i.e Never, Rarely, Sometimes, Often, All the time) [10]:  
23  
24

- 25 1. People react negatively when they know I work in a mental health care setting<sup>1</sup>
- 26 2. People make jokes about me for working in a mental health care setting<sup>1</sup>
- 27 3. I feel ashamed to be working in a mental health care setting<sup>1</sup>
- 28 4. I am reluctant to tell people I work in a mental health care setting<sup>1</sup>
- 29 5. I have been treated unfairly by others when they learn I work in a mental health care setting.

30  
31  
32  
33  
34  
35 An additional six items were answered using the following response categories and similar to  
36 those used by Ben Natan et al., [11]: Strongly agree (1); Slightly agree (2); Neither agree nor  
37 disagree (3); Slightly disagree (4); Strongly disagree (5). Items included:  
38

- 39 1. Most people think less of a person who works in a mental health care setting
- 40 2. Once they know a person works in a mental health care setting, most people will take their  
41 opinions less seriously
- 42 3. Mental health care contributes to the health of people, families, communities and society in  
43 unique and meaningful ways<sup>2</sup>
- 44 4. The mental health profession lacks a scientific basis<sup>2</sup>
- 45 5. Working in a mental health care setting does not require special skills<sup>2</sup>
- 46 6. Mental health work is dangerous<sup>2</sup>.

47  
48  
49  
50  
51  
52  
53  
54  
55 <sup>1</sup> Items were based on Verhaeghe et al., 2012

56 <sup>2</sup> Items were based on Ben Natan et al., 2015

1  
2  
3  
4  
5 Socio-demographic information was captured including age, gender, ethnicity, marital and  
6 residency status and education. In addition, staff were asked to indicate how long they had worked  
7 at IMH, their occupation, and to rate their job satisfaction on a scale from 1-10, where 1 indicated  
8 they were very dissatisfied and 10 indicated very satisfied.  
9  
10

### 11 12 **Statistical analysis**

13  
14 All statistical analyses were done using SAS 9.2 (SAS Institute, Cary, North Carolina, USA). Mean  
15 and standard deviations (SD) were calculated for continuous variables, and frequencies and  
16 percentages for categorical variables. Missing data were very low (0.2 to 0.6%) and only in relation  
17 to associative stigma items. Listwise deletion methods were applied for all analyses.  
18  
19

#### 20 21 22 *Latent class analysis*

23  
24 Latent class analysis was used to classify associative stigma upon patterns of observed  
25 categorical variables. Latent class analysis is a “respondent-centered” approach that seeks to  
26 group individuals into “classes” based on their responses to a set of items [20], and in this case,  
27 their responses to 11 associative stigma items. All associative stigma item responses were  
28 dichotomized such that for the first five questions, 'sometimes' 'often' and 'all the time' defined  
29 endorsement of the items; and for the remaining six questions, 'strongly agree' and 'slightly agree'  
30 defined endorsement. Responses 'rarely' and 'never' from the first set, and 'neither agree nor  
31 disagree' 'slightly disagree' and 'strongly disagree' from the second set defined non-endorsement.  
32  
33 Latent class analysis is a mixture model that posits that there is an  
34 underlying unobserved categorical variable (i.e associative stigma) that divides a population into  
35 mutually exclusive and exhaustive latent classes. It is used to identify homogeneous subgroups,  
36 which share a common pattern of responses within a heterogeneous population. It relates a set  
37 of observed categorical variables to a set of latent variables. A latent class model with the optimal  
38 number of classes was determined using model fit statistics, including the likelihood ratio  $G^2$ ,  
39 Akaike information criterion (AIC, smallest value preferred) and Bayesian information criterion  
40 (BIC, smallest value preferred), entropy (highest value preferred) values and interpretability of  
41 the derived classes [21]. All latent class analyses were conducted by PROC LCA in SAS 9.4  
42 software.  
43  
44  
45  
46  
47  
48  
49  
50  
51

#### 52 53 54 *Multinomial logistic regression*

Multinomial logistic regression was used to examine associations between socio-demographic factors including age, gender, ethnicity, marital and residency status, education, years of employment and occupation and the different classes. Multinomial logistic regression analysis was chosen instead of ordinal regression as it is an appropriate statistical test when analyzing outcome variables with more than two categories. We found that the proportional odds assumption of the ordinal regression model has been violated using the Brant test [22]. These were tested at once and in a hierarchical fashion and were found to be significant. We also used multiple linear regression analyses to examine the relationship between associative stigma and job satisfaction with and without adjustment for socio-demographic correlates. Statistical significance were reported at  $p < 0.05$ .

## RESULTS

The distribution of socio-demographic characteristics is presented in Table 1. The sample ( $n=462$ ) comprised 58 doctors, 201 nurses and 203 allied health staff. The majority were female (63%), Chinese (60.2%) and had been working at IMH between one and five years (42.2%).

Eight unconditional models ranging from two to nine classes were compared to one another using fit statistics to determine the appropriate class structure (Table 2). The AIC value was lowest for the 7-class model (AIC=549.33) and the BIC value was lowest for the 3-class model (BIC=762.48), followed by 4-class model (BIC=769.79). The BIC value typically is considered a better measure of model fit because it penalizes for model complexity more than the AIC [20]. A careful examination of both the 3 and 4-class model solutions led us to select the 3-class model because it was more easily identified, had greater parsimony, and its parameter estimates presented a solution with a more interpretable and distinct set of classes than the 3-class model (Figure 1).

The parameter estimates depicted in Figure 1 and Table 3 provide the 3-class model of associative stigma prevalence and item-response probability (IRP). IRP values range from 0 to 1, where numbers closer to 0 represent a low probability of endorsing a specific associative stigma item, whereas values closer to 1 represent a high probability of endorsing the item. Each class then consists of different probabilities of endorsement for each of the 11 associative stigma items. For example, the first latent class is characterized by a low IRP of endorsing the following items: “I feel ashamed to be working in a mental health care setting” (Item 3), “I am reluctant to tell people I work in a mental health care setting” (Item 4), “I have been treated unfairly by others when they



1  
2  
3 learn I work in a mental health care setting” (Item 5), “Most people think less of a person who  
4 works in a mental health care setting” (Item 6), “Once they know a person works in a mental health  
5 care setting, most people will take their opinions less seriously” (Item 7), “Mental health care  
6 contributes to the health of people, families, communities and society in unique and meaningful  
7 ways” (Item 8), “The mental health profession lacks a scientific basis” (Item 9) and “Working in a  
8 mental health care setting does not require special skills” (Item 10). The IRP ranged from 0.001  
9 to 0.16, thus we labeled this subgroup “no/low associative stigma”. Class 2 comprised staff who  
10 were more likely to report higher response probabilities for items 1 (“People react negatively when  
11 they know they work in a mental health care setting”), 2 (“People make jokes about me for working  
12 in a mental health care setting”), 7 and 11 (“Mental health work is dangerous”) than the “no/low  
13 stigma” and accordingly, we labeled this class as “moderate associative stigma” (IRP ranges from  
14 0.59-0.70). Finally, the high probability of endorsing “sometimes”, “often” or “all the time” to items  
15 1 and 2, and “strongly agree” or “slightly agree” to items 6, 7, 8, 9 and item 11 (IRP ranges from  
16 0.66 to 0.91) were associated with class 3, which was labeled as “high associative stigma”. Within  
17 these three class groups, 48.7%, 40.5% and 10.8% of the population comprised no/low, moderate  
18 and high associative stigma classes, respectively.  
19  
20  
21  
22  
23  
24  
25  
26  
27  
28  
29

30 The results of the multinomial logistic regression for the moderate and high associative stigma  
31 groups, with low stigma as the reference group are presented in Table 4. We found that staff  
32 working at IMH for less than one year ( $p=0.040$ ), and between six and ten years ( $p=0.029$ ) were  
33 less likely to have moderate associative stigma (versus staff working at IMH for more than 10  
34 years). Occupation was also a significant predictor; doctors ( $p=0.007$ ) and nurses ( $p=0.006$ ) were  
35 significantly more likely to experience moderate associative stigma compared to allied health staff.  
36 Factors associated with high associative stigma were lower education ( $p=0.042$ ), Indian ethnicity  
37 ( $p=0.043$ ) and being a nurse ( $p=0.001$ ).  
38  
39  
40  
41  
42  
43

44 Table 5 shows the results from multiple linear regression analyses. After adjusting for socio-  
45 demographic variables, high associative stigma remained significantly associated with lower job  
46 satisfaction scores ( $p<0.0001$ ).  
47  
48  
49

## 50 DISCUSSION

51 There is paucity in the current literature which investigates associative stigma experienced by  
52 mental health professionals. This is the first study to examine associative stigma among mental  
53 health professionals using latent class analysis and endeavors to expand and build our knowledge  
54  
55  
56  
57

1  
2  
3 and understanding of the patterns of associative stigma amongst each of the classes. The findings  
4 reveal that among the study sample, three distinct classes exist; no/low, moderate and high  
5 associative stigma which were associated with unique socio-demographic correlates. Moderate  
6 associative stigma was significantly associated with years of service and occupation, while high  
7 associative stigma was associated with Indian ethnicity, lower education and occupation.  
8  
9  
10

11  
12 Findings revealed that 48.7%, 40.5% and 10.8% of staff working at a psychiatric hospital  
13 experienced no/low, moderate and high associative stigma, respectively. Whilst almost half of the  
14 staff experienced no or low associative stigma (48.7%), the remaining experienced moderate or  
15 high associative stigma, which is of concern. The moderate associative stigma class comprised  
16 staff who were more likely to report higher response probabilities for the following items “People  
17 react negatively when they know they work in a mental health care setting”, “People make jokes  
18 about me for working in a mental health care setting”, “Once they know a person works in a mental  
19 health care setting, most people will take their opinions less seriously” and “Mental health work is  
20 dangerous”. These items are similar to those in the CASS scale which comprised items relating  
21 to the negative perceptions and stereotypes of mental healthcare, psychiatry and people with  
22 mental illnesses and people’s reluctance to disclose working in this field [15]. These items relate  
23 largely to how other people perceive them and how they react towards them as a result of their  
24 profession and therefore efforts to better educate the general population as well as interventions  
25 targeting medical and nursing students are needed to dispel such misconceptions and stigma  
26 surrounding psychiatry and mental health care [23]. High associative stigma comprised staff that  
27 were also more likely to endorse items about other people’s reactions however it also  
28 encompassed items about the mental health profession including “The mental health profession  
29 lacks a scientific basis” and “Working in a mental health care setting does not require special  
30 skills”. Given the higher positive endorsement of the latter items, this indicates that even among  
31 mental health professionals, there is a level of stigma, uncertainty and even negative perceptions  
32 relating to mental health care and psychiatry and similar findings have also been previously  
33 reported [9,11]. It is therefore possible that a consequence of experiencing ongoing associative  
34 stigma, results in these staff holding more discriminatory views, whereby they internalize this  
35 stigma or may have higher perceived stigma. Efforts within mental health care are needed to build  
36 self-esteem and self-confidence, whilst at the same time, taking the opportunity to highlight  
37 success stories in mental health to the public more frequently [24].  
38  
39  
40  
41  
42  
43  
44  
45  
46  
47  
48  
49  
50  
51  
52  
53  
54  
55  
56  
57  
58  
59  
60



1  
2  
3 Various socio-demographic differences were associated with moderate and high associative  
4 stigma. For example, Indians (compared to Chinese) were nearly three times more likely to  
5 experience high associative stigma. Whilst it is difficult to postulate why this may be, some  
6 possible explanations are provided. Firstly, high associative stigma was associated with higher  
7 probability of endorsing positive responses to items relating to (i) how staff perceive the mental  
8 health profession and (ii) how people react towards them. Regarding the latter, we do not know  
9 about the specific people stigmatizing these staff and therefore gaining a greater understanding  
10 of the types of people that judge and stigmatize mental health professionals would allow future  
11 anti-stigma efforts to be targeted towards these population sub-groups. For the former (how staff  
12 perceive the mental health profession), this relates to the individual's own personal views,  
13 whereby they perceive the discipline lacks a scientific basis, the profession doesn't require special  
14 skills or that mental health care doesn't contribute to the health of people, families and  
15 communities in a meaningful way. This could be an embedded cultural belief where in India  
16 psychiatry is still not considered an important medical speciality due to societal apprehensions  
17 and ignorance [25]. This is further substantiated by a recent study among a general population  
18 sample in India which found that one third of participants believed that psychiatrists specialize in  
19 psychiatry because they are not good enough for other specialties [26]. Mental illness stigma  
20 needs to be studied within its sociocultural context in order to understand its origins, meanings  
21 and consequences [27] and in doing so, this may provide great insight into the ethnic differences  
22 observed in relation to associative stigma. Future interventions designed to address associative  
23 stigma among mental health professionals should consider the impact of sociocultural influences.  
24  
25  
26  
27  
28  
29  
30  
31  
32  
33  
34  
35  
36  
37

38 Given the study sample comprised doctors, nurses and allied health professionals, the  
39 overwhelming majority were highly educated, with over 85% having a tertiary qualification or  
40 higher. Those with the least education, which still equates to approximately 10-11 years of  
41 education, were six times more likely to experience high associative stigma and these findings  
42 resonate with those of a recent study which also explored associative stigma among mental health  
43 professionals in China and the US [17]. Research locally and internationally has shown that those  
44 who are less educated tend to hold more stigmatizing views towards the mentally ill [28-30]. Whilst  
45 these studies are related to stigma towards people with a mental illness and not stigma by  
46 association, the two are inter-related and therefore could explain this finding. Another possible  
47 explanation could be that those working in mental healthcare are perceived to not 'require special  
48 skills' and therefore those with lower education are predominantly working in this profession.  
49 Alternatively, given that high associative stigma was related to a higher likelihood of positively  
50  
51  
52  
53  
54  
55  
56  
57

1  
2  
3 endorsing items such as “The mental health profession lacks a scientific basis” and “Working in  
4 a mental health care setting does not require special skills” this may suggest that staff with less  
5 education perceive that being highly educated is not essential to this profession.  
6  
7

8  
9 The number of years of service in a mental health hospital was associated with moderate  
10 associative stigma. Staff working at the psychiatric hospital for less than one year and those with  
11 6-10 years of service, were less likely to experience moderate associative stigma, compared to  
12 those with over 10 years of service, whilst no significant differences were observed for those with  
13 1-5 years of service. For newer staff (less than one year), their association via a professional  
14 capacity with people who have a mental illness would be minimal compared to those with over 10  
15 years of experience. Therefore they would have only been exposed to possible associative stigma  
16 for this short period and hence less likely to experience any form of stigma, discrimination or  
17 prejudice. It is difficult however to postulate why staff with 6-10 years of service would experience  
18 less moderate associative stigma, versus those with over 10 years of service. **Halter [8]** in her  
19 study among nurses found that age was positively correlated with viewing psychiatric nurses as  
20 skilled, logical, dynamic and or respected. The author speculated that years of experience  
21 increased the likelihood of contact with people with a mental illness, thus mediating the influence  
22 of stigmatizing attitudes **[31]**. We predicted, that as a result of working in mental healthcare for  
23 an extended period, staff would no longer be confronted with associative stigma and people would  
24 be less likely to ‘react negatively’ or ‘make jokes’ about where they work, whilst at the same time  
25 they would be ‘acclimatized’ to working in this setting. It could also be a result of some form of  
26 ‘stigma resistance’, whereby these staff can resist or ignore the stigma associated with their  
27 profession, however this does not explain why staff with 6-10 years of service are less likely to  
28 experience associative stigma compared to those with over 10 years of service. Further research  
29 exploring the impact of the number of years or experience in mental health care and associative  
30 stigma are needed.  
31  
32  
33  
34  
35  
36  
37  
38  
39  
40  
41  
42  
43  
44  
45

46 The strongest predictor of moderate and high associative stigma was occupation. Nurses were  
47 significantly more likely to experience both moderate and high associative stigma, while doctors  
48 were significantly more likely to experience moderate associative stigma, when compared to allied  
49 health staff. Numerous studies have recently investigated stigma towards mental health nursing  
50 **[14,32]**, psychiatrists **[33,34]** and the discipline of psychiatry and mental health in general **[24,35]**  
51 which is often perpetuated by nurses, doctors, medical and nursing students and health  
52 professionals working in other sectors, as well as the general public **[31]**. Studies among medical  
53  
54  
55  
56  
57

1  
2  
3 students have shown that the overall status of psychiatry is low [23], where perceived low prestige  
4 and low respect among other medical disciplines are among the main reasons for not choosing  
5 psychiatry [36-40]. Similarly, a recent study among nursing students in Singapore found that only  
6 5.2% of students would 'definitely decide to do' psychiatric nursing [41]. A study among doctors  
7 which assessed reasons why they left the specialty they had initially chosen found that among  
8 psychiatrists, the most common reasons reported included the specialty's poor public image and  
9 the perceived lack of respect among other doctors [42]. It is therefore possible that for some  
10 doctors, psychiatry was not their first preference, whilst for others the sense of being 'looked down  
11 upon' by other health professionals resulted in increased associative stigma.  
12  
13  
14  
15  
16  
17  
18

19 Several studies among nurses and nursing students have found that psychiatry is ranked as one  
20 of the least preferred, attractive and respected disciplines in nursing [8,43]. Halter [8] explored  
21 the characteristics attributed to nurses in multiple disciplines, where psychiatric nurses were often  
22 described as unskilled, illogical, idle and disrespected. Whilst it could not be concluded whether  
23 these attitudes and perceptions were a consequence of associative stigma, such perceptions  
24 about nurses working at the only tertiary psychiatric hospital in Singapore could explain why  
25 nurses were significantly more likely to experience associative stigma. An alternative explanation  
26 could be related to how nurses are perceived. Previous research in Singapore has shown that  
27 the local population often possesses low perceptions of nurses [44], which may further  
28 exacerbate the stigma they experience.  
29  
30  
31  
32  
33  
34  
35

36 It is also possible that this stigma experienced by psychiatrists and nurses operates in two  
37 directions; the first being the stereotypic attitudes or perceptions projected out by them, whilst the  
38 second is the associated attributes projected on them, which they may internalize [14].  
39 Irrespective of the type of stigma, it is important that mental health professionals are aware of this  
40 and how this may impact their role and work-related tasks. In order to address moderate and high  
41 associative stigma associated with nurses and psychiatrists, these mental health professionals  
42 need to explore and challenge such cases of stigma experienced by them. Associative stigma not  
43 only devalues the individual but also the profession as a whole and therefore mental health  
44 professionals play an important role in dispelling stigma related to mental illnesses [14].  
45  
46  
47  
48  
49  
50  
51

52 Associative stigma was found to be associated with job satisfaction. After adjusting for socio-  
53 demographic correlates, we found that high associative stigma was associated with poorer job  
54 satisfaction. Verhaeghe and Bracke [10] found associative stigma was associated with  
55  
56  
57

1  
2  
3 depersonalization and emotional exhaustion among mental health professionals in Belgium, with  
4 the latter leading to decreased job satisfaction. The consequences of stigma in relation to job  
5 satisfaction have been well documented. Similarly, associative stigma among mental health  
6 professionals, can contribute to job stress and poorer outcomes not only in terms of staff well-  
7 being but the quality of care provided to patients and therefore the implications can be detrimental  
8 to both staff and their patients. Due to the cross-sectional nature of this study, the relation between  
9 job satisfaction and associative stigma could be bi-directional and therefore exploring this  
10 association over time would be beneficial. Interventions exploring how associative stigma  
11 contributes to the development of emotional exhaustion, burnout and or job satisfaction and the  
12 impact this has for patients, the quality of care they receive and the relationship they have with  
13 mental health professionals are needed. Furthermore, developing programs with a particular  
14 focus on associative stigma and coping strategies to deal with this among mental health  
15 professionals would be beneficial [45].  
16  
17  
18  
19  
20  
21  
22  
23  
24

25 The findings of this study should be viewed in light of the following limitations. Firstly, at the time  
26 the study was conducted, there was no developed and validated psychometric associative stigma  
27 measure, and therefore items used to measure associative stigma were based on previous  
28 research. Whilst such items have previously been used to measure associative stigma among  
29 various health care professionals, the settings have varied and therefore a detailed pilot or expert  
30 review in the local setting, would have been beneficial. There are now psychometric instruments  
31 that do measure associative stigma such as the CASS, which have been validated in various  
32 populations and are contributing to what was an under researched field. This was a cross-  
33 sectional study among staff working at IMH and therefore these findings are not generalizable to  
34 all mental health professionals in Singapore, nor could causal relationships be established.  
35 However, given that this hospital is the primary provider of tertiary psychiatric care in Singapore,  
36 and all staff included in the study are involved with the care of patients with a mental illness, it  
37 provides valuable insight into the stigma associated with the mental health profession. The study  
38 was limited to doctors, nurses and allied health staff and therefore associative stigma of other  
39 staff including health care attendants, patient services associates and administrative staff was not  
40 gathered and may differ. Whilst one of the primary aims was to explore differences in associative  
41 stigma between occupations, we did not include doctors in the sample size calculation. At the  
42 time of the survey, we knew that less than 100 doctors were working at IMH and therefore efforts  
43 were made to recruit as many doctors as possible, given the small numbers in comparison to  
44 numbers of nurses and allied health staff. Data were not collected on response rates, but rather  
45  
46  
47  
48  
49  
50  
51  
52  
53  
54  
55  
56  
57  
58  
59  
60

1  
2  
3 once the desired quota of nurses and allied health staff was reached (i.e 200 of each group)  
4 recruitment ceased, therefore it is difficult to ascertain the degree of selection bias. Furthermore,  
5 data was not collected on those people that were invited to participate but chose not to respond  
6 and therefore it is possible that responders and non-responders experiences of associative stigma  
7 may differ. The invitation emails were sent to eligible staff through their institution email  
8 addresses. Data collected were based on self-report and therefore respondents may have  
9 provided socially desirable responses or may not have felt comfortable disclosing possible stigma  
10 they may have experienced. Finally, it is important to acknowledge that stigma in general is a  
11 complex and multi-faceted construct which has been theorised and defined in many ways and  
12 can present in different forms such as personal stigma, perceived stigma, self-stigma, structural  
13 stigma or associative stigma. This in itself poses various challenges as there may be some  
14 overlap in these constructs and how they are measured.  
15  
16  
17  
18  
19  
20  
21  
22  
23

24 These limitations notwithstanding, this is one of just a few studies to explore associative stigma  
25 among mental health professionals, and to our knowledge the only study to explore this within an  
26 multi-ethnic Asian setting, and has thus added to the existing sparse literature. Using latent class  
27 analysis, the current study has provided a greater understanding of the extent of associative  
28 stigma among psychiatrists, nurses and allied health staff working at a psychiatric hospital. A 3-  
29 class model of associative stigma was found to have the best fit, where classes were labeled as  
30 no/low, moderate and high associative stigma. Based on these classes, it would be beneficial to  
31 further explore this construct via longitudinal studies or repeatedly measuring associative stigma  
32 over time to compare outcomes such as quality of life and burnout, as well as different types of  
33 job satisfaction across the different classes in order to determine effective interventions to reduce  
34 associative stigma among mental health professionals. At the same time, there is also a scarcity  
35 of literature relating to the development and evaluation of interventions to combat stigma  
36 experienced by health professionals [23]. Research has however shown that increment or  
37 improvement in knowledge as well as actual contact with people who have a mental illness can  
38 help to reduce stigma, whilst improving the image of psychiatry and psychiatrists [24] and  
39 therefore future interventions addressing associative stigma should incorporate such strategies.  
40 Furthermore, in order to reduce stigma, interventions should also include information and  
41 education related to the stereotypes (e.g dangerousness) healthcare providers may experience,  
42 which can further exacerbate associative stigma.  
43  
44  
45  
46  
47  
48  
49  
50  
51  
52  
53  
54

55 There is a need to further explore the outcomes of associative stigma, not just from the  
56  
57

1  
2  
3 perspective of those experiencing this stigma (in this case mental health professionals) but the  
4 impact this stigma may have on their patients and potentially the wider community. Given that  
5 high associative stigma was associated with poorer job satisfaction, which has been shown to  
6 have poorer outcomes for patients [10], the implications of this finding are not only important to  
7 the well-being of staff but also patients. As stigma towards people with a mental illness,  
8 psychiatrists, and the mental health profession is highly interrelated, the ongoing process and  
9 difficult task of combating stigma related to mental illnesses continues. Associative stigma has  
10 received comparatively little attention from empirical researchers and continued efforts to address  
11 this under-studied yet important construct in conjunction with future efforts to dispel many of these  
12 misconceptions are needed.  
13  
14  
15  
16  
17  
18  
19

20 **Word Count:** 5848  
21

## 22 **DECLARATIONS**

23  
24  
25 **Ethics approval:** Ethical approval was obtained from the Domain Specific Review Board of the  
26 National Healthcare Group, Singapore prior to the launch of the survey.  
27

28 **Patient consent:** Obtained  
29

30 **Acknowledgement of funding:** This research was supported by the Singapore Ministry of  
31 Health's National Medical Research Council under the Centre Grant Programme (Grant No.:  
32 NMRC/CG/004/2013).  
33

34 **Competing interest:** The authors declare they have no competing interests  
35

36 **Author contributions:** LP developed the study design, collected and verified the data and wrote  
37 the manuscript. SC assisted with the data collection and verification and provided intellectual  
38 inputs to the manuscript. EA and QY analyzed and interpreted the data and provided intellectual  
39 inputs to the manuscript. BYC assisted with the set-up and monitored the online survey and  
40 provided intellectual inputs to the manuscript. JAV provided intellectual inputs into the study  
41 design and interpretation of the findings. SO and KLY provided intellectual inputs into the study  
42 design and provided inputs to the manuscript. HCC provided clinical inputs into the findings and  
43 edited the manuscript. SAC and MS assisted in study design, interpreted the data, and provided  
44 intellectual inputs on the manuscript. All authors read and approved the final manuscript.  
45  
46  
47  
48  
49

50 **Availability of data and materials:** Data is not available for online access, however readers who  
51 wish to gain access to the data can write to the senior author Dr Mythily Subramaniam at  
52 [mythily@imh.com.sg](mailto:mythily@imh.com.sg) with their requests. Access can be granted subject to the Institutional  
53  
54  
55  
56  
57

1  
2  
3 Review Board (IRB) and the research collaborative agreement guidelines. This is a requirement  
4 mandated for this research study by our IRB and funders.  
5

6 **Acknowledgement:** The authors would like to thank Dr Merav Ben Natan for sharing their  
7 associative stigma questionnaire.  
8  
9  
10  
11  
12  
13  
14  
15  
16  
17  
18  
19  
20  
21  
22  
23  
24  
25  
26  
27  
28  
29  
30  
31  
32  
33  
34  
35  
36  
37  
38  
39  
40  
41  
42  
43  
44  
45  
46  
47  
48  
49  
50  
51  
52  
53  
54  
55  
56  
57  
58  
59  
60

For peer review only



## REFERENCES

1. Link, B.G. and Phelan, J.C. (2001) Conceptualizing stigma. *Annual Review Sociology*, 27, 363-385
2. Corrigan PW, Kosyluk KA. Mental illness stigma: types, constructs, and vehicles for change. In: Corrigan PW, editor. *The stigma of disease and disability*. Washington, DC: American Psychological Association; 2014.
3. Goffman, E. *Stigma: Notes on the management of spoiled identity*. New York: Simon and Schuster. 1963
4. Glozier, N. Workplace Effects of the Stigmatization of Depression. *J. Occup. Env. Med.* 1998;40:793-800.
5. Corrigan PW and Watson AC. Understanding the impact of stigma on people with mental illness. *World Psychiatry*. 2002;1: 16–20.
6. Link, B. G., E. Struening, S. Neese-Todd, S. Asmussen, and J. C. Phelan. The Consequences of Stigma for the Self-Esteem of People with Mental Illnesses. *Psych Serv* 2001; 52:1621-26.
7. Markowitz FE. The Effects of Stigma on the Psychological Well-Being and Life Satisfaction of Persons with Mental Illness. *J. Health Soc. Behav* 1998;39:335-47.
8. Halter, M. J. Perceived characteristics of psychiatric nurses: Stigma by association. *Arch Psychiatr Nurs*, 2008; 22: 20-26.
9. Ross, CA., & Goldner, EM. Stigma, negative attitudes and discrimination towards mental illness within the nursing profession: A review of the literature. *Journal of Psychiatric and Mental Health Nursing*, 2009;16: 558-567.
10. Verhaeghe M and Bracke P. Associative Stigma among Mental Health Professionals: Implications for Professional and Service User Well-Being. *J. Health Soc. Behav* 2012; 53(1):17-32
11. Ben Natan M, Drori T and Hochman O. Associative Stigma related to Psychiatric Nursing within the Nursing Profession. *Arch Psych Nurs* 2015;29(6):388-392.
12. Vayshenker BA, DeLuca J, Bustle T, Yanos P. "As soon as people hear that word...": Associative stigma among clinicians working with people with serious mental illness, *Journal of Public Mental Health*, 2018;17(1):pp.20-28
13. Gouthro, T. J. Recognizing and addressing the stigma associated with mental health nursing: A critical perspective. *Issues Ment. Health Nurs*, 2009;30(11),669-676
14. Delaney KR. Psychiatric Mental Health Nurses: Stigma Issues We Fail to See. *Arch Psych Nurs*, 2012; 26: 333–335
15. Stuart H, Sartorius N, Liinamaa T; Images Study Group. Images of psychiatry and psychiatrists. *Acta Psychiatr Scand*. 2015;131(1):21–28.
16. Yanos, P. T., Vayshenker, B., Deluca, J., & O'Connor, L. K. Development and validation of a scale of mental health clinicians' experiences of associative stigma. *Psychiatric Services*, 2017;68, 1053-1060.
17. Lin, X., Rosenheck, R., Sun., B., Xie., G., Zhong., G., Tan., C., Li., Z., Yu., M., & He., H. Associative stigma experienced by mental health professionals in China and the United States. *Social Psychiatry and Psychiatric Epidemiology*. 2018; 1-9 <https://doi.org/10.1007/s00127-018-1643-6>
18. Pharris A, Hoa NP, Tishelman C, Marrone G, Kim Chuc NT, Brugha R, Thorson A. Community patterns of stigma towards persons living with HIV: a population-based latent class analysis from rural Vietnam. *BMC Public Health*. 2011 Sep 18;11:705.
19. Nylund KL, Asparouhov T, Muthen BO. Deciding on the number of classes in latent class analysis and growth mixture modeling: A Monte Carlo simulation study. *Structural equation modeling* 2007;14: 535–69
20. Hadzi-Pavlovic D (2009) Finding patterns and groupings: I. Introduction to latent class analysis. *Acta Neuropsychiatrica* 21: 312–13.



21. Collins LM, Lanza ST: Latent class and latent transition analysis with applications in the social, behavioral, and health sciences. Hoboken, New Jersey: John Wiley & Sons, Inc; 2010.
22. Brant, R. Assessing proportionality odds model for ordinal logistic regression. *Biometric*, 1990; 46, 1171-1178
23. Sartorius N, Gaebel W, Cleveland H, Stuart H, Akiyama T et al. WPA guidance on how to combat stigmatization of psychiatry and psychiatrists. *World Psychiatry* 2010;9:131-144
24. Moller-Leimkuhler AM, Möller HJ, Maier W, Gaebel W, Falkai P. EPA guidance on improving the image of psychiatry. *Eur Arch Psychiatry Clin Neurosci* 2016; 266:139–154
25. Sood M and Chadda RK. Women in psychiatry: A view from the Indian subcontinent. *Indian J Psychiatry*. 2009; 51(3): 199–201
26. Zieger A, Mungee A, Schomerus G, Ta TM, Weyers A, Böge K et al. Attitude toward psychiatrists and psychiatric medication: A survey from five metropolitan cities in India. *Indian J Psychiatry* 2017;59:341-6.
27. Thara R & Srinivasan TN. How stigmatizing is schizophrenia in India? *Int J Soc Psychiatry* 2000; 46: 135-41
28. Subramaniam M, Abdin E, Picco L, Pang S, Shafie S, Vaingankar JA, Kwok KW, Verma K and Chong SA. Stigma towards people with mental disorders and its components – a perspective from multi-ethnic Singapore. *Epidemiology and Psychiatric Sciences*, 2106; 28:1-12.
29. Griffiths KM, Christensen H, Jorm AF. Predictors of depression stigma. *BMC Psychiatry* 2008; 8:25.
30. Corrigan PW, Watson AC. The stigma of psychiatric disorders and the gender, ethnicity, and education of the perceiver. *Community Ment Health J* 2007;43, 439–458.
31. Alexander LA and Link BG. The impact of contact on stigmatizing attitudes toward people with mental illness. *Journal of Mental Health*, 2003;12, 271–289.
32. Halter, M. J. Stigma in psychiatric nursing. *Perspectives in Psychiatric Care*, 2002;38, 23-29.
33. Catthoor K, Hutsebaut J, Schrijvers D, De Hert M, Peuskens J, Sabbe B. Preliminary study of associative stigma among trainee psychiatrists in Flanders, Belgium. *World J Psychiatry* 2014;4:62–68
34. Gaebel W, Zäske H, Zielasek J, Cleveland H, Samjeske K et al. Stigmatization of psychiatrists and general practitioners: results of an international survey. *Eur Arch Psychiatry Clin Neurosci* 2015; 265:189–197
35. Gaebel W, Zäske H, Cleveland HR, Zielasek J, Stuart H, Arboleda-Florez J et al., Measuring the stigma of psychiatry and psychiatrists: Development of a questionnaire. *European Archives of Psychiatry and Clinical Neuroscience*, 2011; 261(2), 119-123.
36. Compton MT, Frank E, Elon L et al. Changes in U.S. medical students' specialty interests over the course of medical school. *J Gen Intern Med* 2008;23:1095-100.
37. Gat I, Abramowitz MZ, Bentov-Gofrit D et al. Changes in the attitudes of Israeli students at the Hebrew University Medical School toward residency in psychiatry: a cohort study. *Isr J Psychiatry Relat Sci* 2007;44:194-203.
38. Laugharne R, Appiah-Poku J, Laugharne J et al. Attitudes toward psychiatry among final-year medical students in Kumasi, Ghana. *Acad Psychiatry* 2009;33:71-5.
39. Malhi GS, Parker GB, Parker K et al. Shrinking away from psychiatry? A survey of Australian medical students' interest in psychiatry. *Aust N Zeal J Psychiatry* 2002;36:416-23.
40. Pailhez G, Bulbena A, Coll J et al. Attitudes and views on psychiatry: a comparison between Spanish and U.S. medical students. *Acad Psychiatry* 2005;29:82-91.

- 1
- 2
- 3 41. Ong HL, Seow E, Chua BY , Xie H, Wang J, Lau YW, Chong SA, Subramaniam M. Why is
- 4 psychiatric nursing not the preferred option for nursing students: A cross-sectional study
- 5 examining pre-nursing and nursing school factors *Nurse Education Today* 52 (2017) 95–102
- 6
- 7 42. Lambert TW, Turner G, Fazel S et al. Reasons why some UK medical graduates who
- 8 initially choose psychiatry do not pursue it as a long-term career. *Psychol Med* 2006;36:679-
- 9 84.
- 10 43. Malhi, G. S., Parker, G. B., Carr, V. J., Kirkby, K. C., Yellowlees, P., Boyce, P., et al.
- 11 Attitudes toward psychiatry among students entering medical school. *Acta Psychiatrica*
- 12 *Scandinavica*, 2003;107, 424–429.
- 13 44. Tay LH, Ang E and Hegney D. Nurses' perceptions of the barriers to effective
- 14 communication with inpatient cancer adults in Singapore. *J of Clin Nurs* 2012; 21:2647-58
- 15 45. Vayshenker BA, DeLuca J, Bustle T, Yanos P. "As soon as people hear that word...": associative stigma
- 16 among clinicians working with people with serious mental illness., *Journal of Public Mental Health*,
- 17 2018;17(1):20-28
- 18
- 19
- 20
- 21
- 22
- 23
- 24
- 25
- 26
- 27
- 28
- 29
- 30
- 31
- 32
- 33
- 34
- 35
- 36
- 37
- 38
- 39
- 40
- 41
- 42
- 43
- 44
- 45
- 46
- 47
- 48
- 49
- 50
- 51
- 52
- 53
- 54
- 55
- 56
- 57
- 58
- 59
- 60

**Table 1: Characteristics of the study sample**

| <b>Characteristics</b>                        | <b>n</b> | <b>%</b> |
|-----------------------------------------------|----------|----------|
| Age (mean years, SD)                          | 36.4     | 10.6     |
| Minimum to Maximum                            | 21 to    | 71       |
| Gender                                        |          |          |
| Female                                        | 291      | 63.0     |
| Male                                          | 171      | 37.0     |
| Ethnicity                                     |          |          |
| Chinese                                       | 278      | 60.2     |
| Malay                                         | 36       | 7.8      |
| Indian                                        | 64       | 13.8     |
| Filipino                                      | 59       | 12.8     |
| Myanmar                                       | 16       | 3.5      |
| Others                                        | 9        | 1.9      |
| Marital status                                |          |          |
| Never married                                 | 205      | 44.4     |
| Ever married                                  | 257      | 55.6     |
| Education level                               |          |          |
| Secondary/ ITE/'O' level                      | 18       | 3.9      |
| 'A' level/diploma                             | 49       | 10.6     |
| Bachelor                                      | 241      | 52.2     |
| Master or above                               | 154      | 33.3     |
| Residential status                            |          |          |
| Singapore Citizen                             | 320      | 69.2     |
| Permanent Resident                            | 59       | 12.8     |
| Non Resident                                  | 83       | 18.0     |
| Occupation                                    |          |          |
| Doctor                                        | 58       | 12.6     |
| Nurse                                         | 201      | 43.5     |
| Allied Health                                 | 203      | 43.9     |
| Years worked at Institute<br>Of Mental Health |          |          |
| Less than 1 year                              | 52       | 11.3     |
| 1-5 years                                     | 195      | 42.2     |
| 6-10 years                                    | 103      | 22.3     |
| More than 10 years                            | 112      | 24.2     |
| <b>Job satisfaction</b> (mean years, SD)      | 7.2      | 1.6      |
| Minimum to Maximum                            | 1 to     | 10       |

**SD= standard deviation**

**Table 2: Model comparisons and fit indices**

| Classes | AIC    | BIC           | CAIC    | ABIC   | Entropy |
|---------|--------|---------------|---------|--------|---------|
| 2       | 711.02 | 806.14        | 829.14  | 733.14 | 0.77    |
| 3       | 617.74 | <b>762.48</b> | 797.48  | 651.40 | 0.80    |
| 4       | 575.42 | 769.79        | 816.79  | 620.63 | 0.78    |
| 5       | 571.02 | 815.02        | 874.02  | 627.77 | 0.79    |
| 6       | 589.06 | 882.69        | 953.69  | 657.35 | 0.68    |
| 7       | 549.33 | 892.58        | 975.58  | 629.16 | 0.78    |
| 8       | 550.76 | 943.64        | 1038.64 | 642.13 | 0.80    |
| 9       | 567.26 | 1009.77       | 1116.77 | 670.18 | 0.80    |

Note: Akaike information criterion (AIC), Bayesian information criterion (BIC), consistent AIC (CAIC), adjusted BIC (ABIC) and entropy all measure model fit. These model comparison measurements were used for choosing the optimal number of classes in latent class analysis, where the models with the smallest values indicate a better fit.

**Table 3: Three latent class model of associative stigma prevalence and item-response probabilities**

| Item | Statement                                                                                                               | Endorsement rate** (n=462) | Latent class (Model 3)                |                                                       |                                    |
|------|-------------------------------------------------------------------------------------------------------------------------|----------------------------|---------------------------------------|-------------------------------------------------------|------------------------------------|
|      |                                                                                                                         |                            | CLASS 1<br>No/low<br>48.7%<br>(n=225) | CLASS 2<br>Moderate<br>Prevalence<br>40.5%<br>(n=187) | CLASS 3<br>High<br>10.8%<br>(n=50) |
|      |                                                                                                                         |                            | Item response probabilities*          |                                                       |                                    |
| 1    | People react negatively when they know I work in a mental health care setting                                           | 60.61                      | 0.46                                  | 0.70                                                  | 0.91                               |
| 2    | People make jokes about me for working in a mental health care setting                                                  | 63.85                      | 0.56                                  | 0.65                                                  | 0.91                               |
| 3    | I feel ashamed to be working in a mental health care setting                                                            | 4.76                       | 0.00                                  | 0.00                                                  | 0.39                               |
| 4    | I am reluctant to tell people I work in a mental health care setting                                                    | 14.50                      | 0.10                                  | 0.09                                                  | 0.49                               |
| 5    | I have been treated unfairly by others when they learn I work in a mental health care setting                           | 12.99                      | 0.04                                  | 0.13                                                  | 0.50                               |
| 6    | Most people think less of a person who works in a mental health care setting                                            | 28.14                      | 0.04                                  | 0.86                                                  | 0.77                               |
| 7    | Once they know a person works in a mental health care setting, most people will take their opinions less seriously      | 20.13                      | 0.00                                  | 0.65                                                  | 0.81                               |
| 8    | Mental health care contributes to the health of people, families, communities and society in unique and meaningful ways | 91.99                      | 0.08                                  | 0.15                                                  | 0.60                               |
| 9    | The mental health profession lacks a scientific basis                                                                   | 14.94                      | 0.16                                  | 0.27                                                  | 0.79                               |
| 10   | Working in a mental health care setting does not require special skills                                                 | 2.81                       | 0.02                                  | 0.02                                                  | 0.36                               |
| 11   | Mental health work is dangerous                                                                                         | 40.69                      | 0.45                                  | 0.59                                                  | 0.66                               |

1  
2  
3  
4  
5  
6  
7  
8  
9  
10  
11  
12  
13  
14  
15  
16  
17  
18  
19  
20  
21  
22  
23  
24  
25  
26  
27  
28  
29  
30  
31  
32  
33  
34  
35  
36  
37  
38  
39  
40  
41  
42  
43  
44  
45  
46  
47

\*Item response probability values range from 0 to 1, where numbers closer to 0 represent a low probability of endorsing a specific item, whereas values closer to 1 represent a high probability of endorsing the item. \*\*Endorsement rate was determined if respondents provided the following responses: sometimes, often, all the time, slightly agree or strongly agree.

For peer review only

**Table 4: Socio-demographic and employment related correlates of associative stigma among mental health professionals versus the reference group (no/low associative stigma)\*\***

|                      |                                     | Moderate Associative Stigma |             |             |              | High Associative Stigma |             |              |              |
|----------------------|-------------------------------------|-----------------------------|-------------|-------------|--------------|-------------------------|-------------|--------------|--------------|
|                      |                                     | Odds Ratio                  | 95% CI      |             | p value      | Odds Ratio              | 95% CI      |              | p value      |
|                      |                                     |                             | Lower       | Upper       |              |                         | Lower       | Upper        |              |
| Age                  |                                     | 0.98                        | 0.95        | 1.00        | 0.092        | 0.98                    | 0.94        | 1.02         | 0.345        |
| Sex                  | Female (Ref)                        |                             |             |             |              |                         |             |              |              |
|                      | Male                                | 1.23                        | 0.78        | 1.94        | 0.369        | 1.18                    | 0.57        | 2.43         | 0.655        |
| Residency status     | Singapore Citizen (Ref)             |                             |             |             |              |                         |             |              |              |
|                      | Permanent Resident                  | 1.34                        | 0.64        | 2.82        | 0.443        | 0.72                    | 0.21        | 2.48         | 0.607        |
|                      | Non Resident                        | 1.12                        | 0.47        | 2.65        | 0.801        | 0.36                    | 0.08        | 1.66         | 0.189        |
| Ethnicity            | Chinese (Ref)                       |                             |             |             |              |                         |             |              |              |
|                      | Malay                               | 0.59                        | 0.22        | 1.55        | 0.282        | 0.97                    | 0.29        | 3.26         | 0.965        |
|                      | Indian                              | 1.61                        | 0.80        | 3.27        | 0.186        | <b>2.97</b>             | <b>1.04</b> | <b>8.53</b>  | <b>0.043</b> |
|                      | Filipino                            | 0.88                        | 0.31        | 2.45        | 0.802        | 3.00                    | 0.63        | 14.38        | 0.170        |
|                      | Myanmar                             | 1.69                        | 0.43        | 6.62        | 0.450        | 0.92                    | 0.07        | 11.56        | 0.947        |
|                      | Others                              | 1.13                        | 0.25        | 5.19        | 0.874        | .                       | .           | .            | .            |
| Marital status       | Never married (Ref)                 |                             |             |             |              |                         |             |              |              |
|                      | Ever married                        | 1.13                        | 0.70        | 1.83        | 0.625        | 1.06                    | 0.48        | 2.37         | 0.885        |
| Education            | Secondary/ 'O/N' level <sup>a</sup> | 3.06                        | 0.77        | 12.10       | 0.111        | <b>6.18</b>             | <b>1.07</b> | <b>35.89</b> | <b>0.042</b> |
|                      | 'A' level <sup>b</sup> & diploma    | 1.61                        | 0.62        | 4.21        | 0.333        | 2.50                    | 0.61        | 10.28        | 0.203        |
|                      | Bachelor                            | 1.22                        | 0.71        | 2.11        | 0.470        | 1.28                    | 0.44        | 3.74         | 0.656        |
|                      | Masters or above (Ref)              |                             |             |             |              |                         |             |              |              |
| Occupation           | Doctor                              | <b>2.74</b>                 | <b>1.31</b> | <b>5.71</b> | <b>0.007</b> | 2.22                    | 0.46        | 10.84        | 0.324        |
|                      | Nurse                               | <b>2.44</b>                 | <b>1.29</b> | <b>4.64</b> | <b>0.006</b> | <b>6.62</b>             | <b>2.23</b> | <b>19.63</b> | <b>0.001</b> |
|                      | Allied Health (Ref)                 |                             |             |             |              |                         |             |              |              |
| Years worked at IMH* | <1 year                             | <b>0.36</b>                 | <b>0.13</b> | <b>0.95</b> | <b>0.040</b> | 0.23                    | 0.03        | 1.71         | 0.151        |
|                      | 1-5 years                           | 0.53                        | 0.25        | 1.09        | 0.083        | 0.98                    | 0.28        | 3.39         | 0.977        |
|                      | 6-10 years                          | <b>0.45</b>                 | <b>0.22</b> | <b>0.92</b> | <b>0.029</b> | 0.79                    | 0.24        | 2.55         | 0.689        |
|                      | >10 years (Ref)                     |                             |             |             |              |                         |             |              |              |

Ref= reference group CI= confidence interval\*Institute of Mental Health.

\*\*Multinomial logistic regression model.

<sup>a</sup>= 'O' and 'N' levels indicate 10 and 11 years of education, respectively.

<sup>b</sup>= 'A' level indicates 12 years of education.

**Table 5: Relationship between associative stigma and job satisfaction**

| Latent classes              | Job satisfaction |      |      | Beta coefficient | Model 1 |       | p value       | Adjusted Beta coefficient | Model 2 |       | p value          |
|-----------------------------|------------------|------|------|------------------|---------|-------|---------------|---------------------------|---------|-------|------------------|
|                             | n                | Mean | SD   |                  | 95% CI  |       |               |                           | 95% CI  |       |                  |
|                             |                  |      |      |                  | Lower   | Upper |               |                           | Lower   | Upper |                  |
| No/low associative stigma   | 225              | 7.24 | 1.52 | Ref.             |         |       |               | Ref.                      |         |       |                  |
| Moderate associative stigma | 187              | 7.26 | 1.51 | 0.02             | -0.28   | 0.32  | 0.9132        | -0.18                     | -0.49   | 0.12  | 0.2337           |
| High associative stigma     | 50               | 6.46 | 1.79 | -0.78            | -1.26   | -0.30 | <b>0.0013</b> | -1.08                     | -1.57   | -0.59 | <b>&lt;.0001</b> |

Ref= Reference group CI= confidence interval SD= standard deviation  
 Note: Job satisfaction scores were based on a single item (how satisfied are you with your job?) using a scale from 1 to 10, where 1 indicates very dissatisfied and 10 indicate very satisfied.  
 Model 1 = Simple linear regression  
 Model 2 = Multiple linear regression after adjusting for socio-demographic and employment related correlates including age, gender, ethnicity, residency status, marital status, education, occupation and years worked at Institute of Mental Health



1  
2  
3  
4  
5  
6  
7  
8  
9  
10  
11  
12  
13  
14  
15  
16  
17  
18  
19  
20  
21  
22  
23  
24  
25  
26  
27  
28  
29  
30  
31  
32  
33  
34  
35  
36  
37  
38  
39  
40  
41  
42  
43  
44  
45  
46  
47  
48  
49  
50  
51  
52  
53  
54  
55  
56  
57  
58  
59  
60

For peer review only

Figure 1: 3-class unconditional latent class analysis of associative stigma

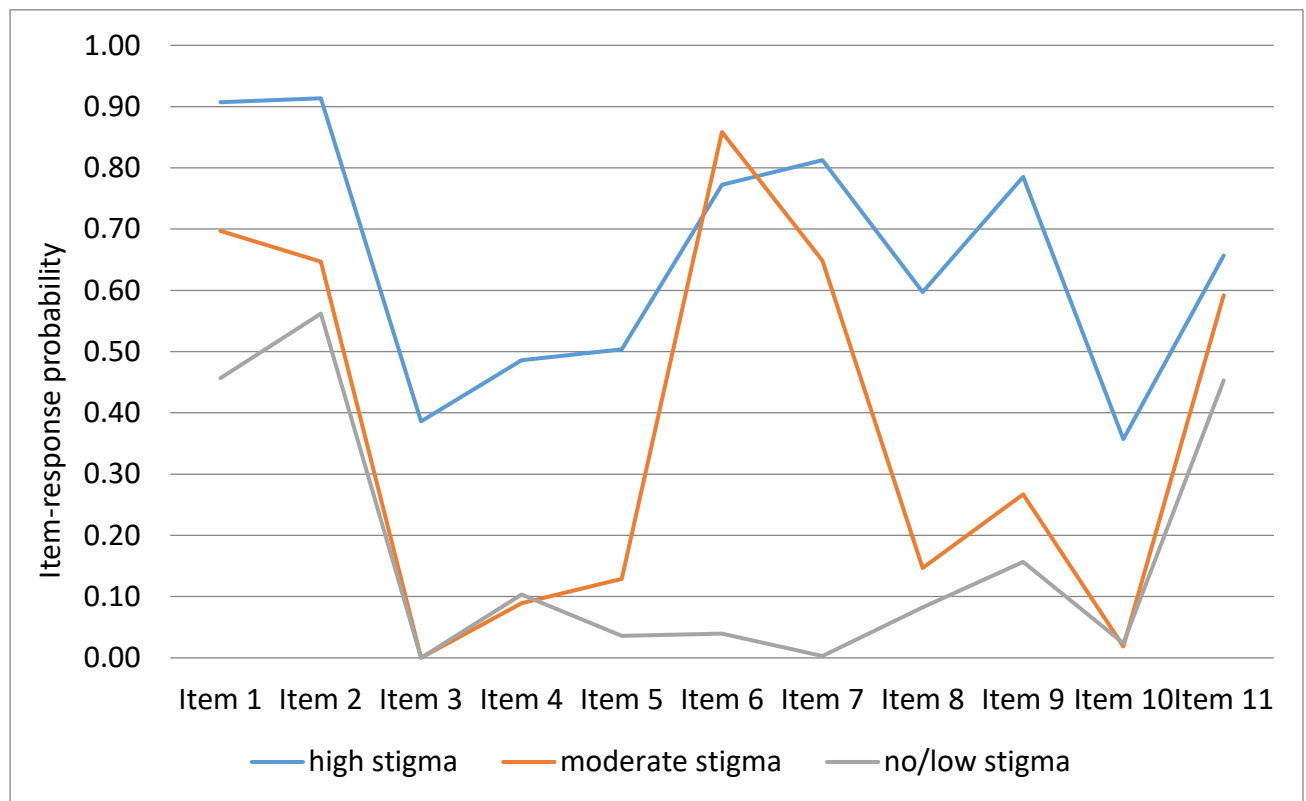

review only

**STROBE 2007 (v4) Statement—Checklist of items that should be included in reports of *cross-sectional studies***

| Section/Topic                | Item # | Recommendation                                                                                                                                                                       | Reported on page # |
|------------------------------|--------|--------------------------------------------------------------------------------------------------------------------------------------------------------------------------------------|--------------------|
| <b>Title and abstract</b>    | 1      | (a) Indicate the study's design with a commonly used term in the title or the abstract                                                                                               | 1                  |
|                              |        | (b) Provide in the abstract an informative and balanced summary of what was done and what was found                                                                                  | 2                  |
| <b>Introduction</b>          |        |                                                                                                                                                                                      |                    |
| Background/rationale         | 2      | Explain the scientific background and rationale for the investigation being reported                                                                                                 | 3                  |
| Objectives                   | 3      | State specific objectives, including any prespecified hypotheses                                                                                                                     | 4                  |
| <b>Methods</b>               |        |                                                                                                                                                                                      |                    |
| Study design                 | 4      | Present key elements of study design early in the paper                                                                                                                              | 5                  |
| Setting                      | 5      | Describe the setting, locations, and relevant dates, including periods of recruitment, exposure, follow-up, and data collection                                                      | 5                  |
| Participants                 | 6      | (a) Give the eligibility criteria, and the sources and methods of selection of participants                                                                                          | 5                  |
| Variables                    | 7      | Clearly define all outcomes, exposures, predictors, potential confounders, and effect modifiers. Give diagnostic criteria, if applicable                                             | 6                  |
| Data sources/<br>measurement | 8*     | For each variable of interest, give sources of data and details of methods of assessment (measurement). Describe comparability of assessment methods if there is more than one group | 6                  |
| Bias                         | 9      | Describe any efforts to address potential sources of bias                                                                                                                            |                    |
| Study size                   | 10     | Explain how the study size was arrived at                                                                                                                                            | 5                  |
| Quantitative variables       | 11     | Explain how quantitative variables were handled in the analyses. If applicable, describe which groupings were chosen and why                                                         | 7                  |
| Statistical methods          | 12     | (a) Describe all statistical methods, including those used to control for confounding                                                                                                | 7                  |
|                              |        | (b) Describe any methods used to examine subgroups and interactions                                                                                                                  |                    |
|                              |        | (c) Explain how missing data were addressed                                                                                                                                          |                    |
|                              |        | (d) If applicable, describe analytical methods taking account of sampling strategy                                                                                                   |                    |
|                              |        | (e) Describe any sensitivity analyses                                                                                                                                                |                    |
| <b>Results</b>               |        |                                                                                                                                                                                      |                    |

|                          |     |                                                                                                                                                                                                                                                                                                                                                                                                               |       |
|--------------------------|-----|---------------------------------------------------------------------------------------------------------------------------------------------------------------------------------------------------------------------------------------------------------------------------------------------------------------------------------------------------------------------------------------------------------------|-------|
| Participants             | 13* | (a) Report numbers of individuals at each stage of study—eg numbers potentially eligible, examined for eligibility, confirmed eligible, included in the study, completing follow-up, and analysed<br>(b) Give reasons for non-participation at each stage<br>(c) Consider use of a flow diagram                                                                                                               | 7-8   |
| Descriptive data         | 14* | (a) Give characteristics of study participants (eg demographic, clinical, social) and information on exposures and potential confounders<br>(b) Indicate number of participants with missing data for each variable of interest                                                                                                                                                                               | 7-8   |
| Outcome data             | 15* | Report numbers of outcome events or summary measures                                                                                                                                                                                                                                                                                                                                                          |       |
| Main results             | 16  | (a) Give unadjusted estimates and, if applicable, confounder-adjusted estimates and their precision (eg, 95% confidence interval). Make clear which confounders were adjusted for and why they were included<br>(b) Report category boundaries when continuous variables were categorized<br>(c) If relevant, consider translating estimates of relative risk into absolute risk for a meaningful time period | 8-9   |
| Other analyses           | 17  | Report other analyses done—eg analyses of subgroups and interactions, and sensitivity analyses                                                                                                                                                                                                                                                                                                                | 8-9   |
| <b>Discussion</b>        |     |                                                                                                                                                                                                                                                                                                                                                                                                               |       |
| Key results              | 18  | Summarise key results with reference to study objectives                                                                                                                                                                                                                                                                                                                                                      | 9-12  |
| Limitations              | 19  | Discuss limitations of the study, taking into account sources of potential bias or imprecision. Discuss both direction and magnitude of any potential bias                                                                                                                                                                                                                                                    | 13-14 |
| Interpretation           | 20  | Give a cautious overall interpretation of results considering objectives, limitations, multiplicity of analyses, results from similar studies, and other relevant evidence                                                                                                                                                                                                                                    | 14-15 |
| Generalisability         | 21  | Discuss the generalisability (external validity) of the study results                                                                                                                                                                                                                                                                                                                                         | 14    |
| <b>Other information</b> |     |                                                                                                                                                                                                                                                                                                                                                                                                               |       |
| Funding                  | 22  | Give the source of funding and the role of the funders for the present study and, if applicable, for the original study on which the present article is based                                                                                                                                                                                                                                                 | 15    |

\*Give information separately for cases and controls in case-control studies and, if applicable, for exposed and unexposed groups in cohort and cross-sectional studies.

**Note:** An Explanation and Elaboration article discusses each checklist item and gives methodological background and published examples of transparent reporting. The STROBE checklist is best used in conjunction with this article (freely available on the Web sites of PLoS Medicine at <http://www.plosmedicine.org/>, Annals of Internal Medicine at <http://www.annals.org/>, and Epidemiology at <http://www.epidem.com/>). Information on the STROBE Initiative is available at [www.strobe-statement.org](http://www.strobe-statement.org).
